# Supplementary material
Source: MDPI journal article supplement (https://www.mdpi.com/search?q=molecules-25-03187)
Supplement: s001 [file molecules-25-03187-s001.pdf]

Supporting Information

# 4-Arylthieno[2,3-*b*]pyridine-2-carboxamides are a new class of antiplasmodial agents

Sandra I. Schweda <sup>1,2</sup>, Arne Alder <sup>3,4,5</sup>, Tim Gilberger <sup>3,4,5</sup> and Conrad Kunick <sup>1,2,\*</sup>

1 Institut für Medizinische und Pharmazeutische Chemie, Technische Universität Braunschweig, Beethovenstraße 55, 38106 Braunschweig, Germany

2 Zentrum für Pharmaverfahrenstechnik (PVZ), Technische Universität Braunschweig, Franz-Liszt-Straße 35A, 38106 Braunschweig, Germany

3 Centre for Structural Systems Biology, 22607 Hamburg, Germany

4 Bernhard Nocht Institute for Tropical Medicine, 20359 Hamburg, Germany

5 University of Hamburg, 20146 Hamburg, Germany

\* Correspondence: c.kunick@tu-braunschweig.de

---

## Table of contents

|                                                                                                |    |
|------------------------------------------------------------------------------------------------|----|
| Figure S1: Structures and names of compounds <b>9a-9af</b> and <b>17a-17l</b>                  | 1  |
| Figure S2-S5: Spectral data of <b>9a</b>                                                       | 9  |
| Figure S6-S9: Spectral data of <b>9e</b>                                                       | 13 |
| Figure S10-S13: Spectral data of <b>9j</b>                                                     | 17 |
| Figure S14-S18: Spectral data of <b>9m</b>                                                     | 21 |
| Figure S19-S22: Spectral data of <b>9n</b>                                                     | 26 |
| Figure S23-S26: Spectral data of <b>9y</b>                                                     | 30 |
| Figure S27-S31: Spectral data of <b>9z</b>                                                     | 34 |
| Figure S32-S35: Spectral data of <b>9ac</b>                                                    | 39 |
| Figure S36-S40: Spectral data of <b>17a</b>                                                    | 43 |
| Figure S41-S45: Spectral data of <b>17b</b>                                                    | 48 |
| Figure S46-S49: Spectral data of <b>17e</b>                                                    | 53 |
| Figure S50-S53: Spectral data of <b>17f</b>                                                    | 57 |
| Figure S54-S57: Spectral data of <b>17g</b>                                                    | 61 |
| Figure S58-S61: Spectral data of <b>17h</b>                                                    | 65 |
| Figure S62-S79: HPLC chromatograms of <b>9a, 9e, 9m, 9y, 9ac, 17a, 17b, 17f</b> and <b>17g</b> | 69 |

Figure S1:

3,6-Diamino-4-(3-chlorophenyl)-*N*-(4-chlorophenyl)-5-cyanothieno[2,3-*b*]pyridine-2-carboxamide **9a** (KuSaSch018)

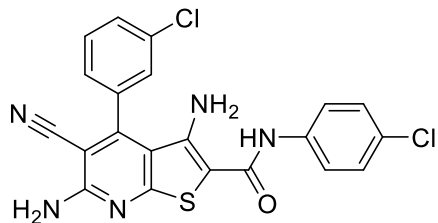

3,6-Diamino-*N*-(4-chlorophenyl)-5-cyano-4-(3-methylphenyl)thieno[2,3-*b*]pyridine-2-carboxamide **9e** (KuSaSch031)

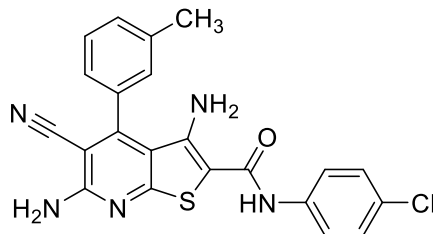

3,6-Diamino-*N*-(2-chlorophenyl)-5-cyano-4-(3-fluorophenyl)thieno[2,3-*b*]pyridine-2-carboxamide **9b** (KuSaSch022)

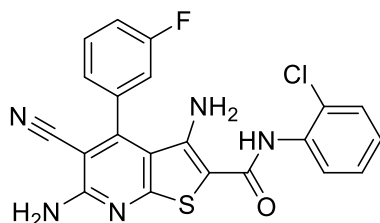

3,6-Diamino-*N*-(2-chlorophenyl)-5-cyano-4-(3-methylphenyl)thieno[2,3-*b*]pyridine-2-carboxamide **9f** (KuSaSch032)

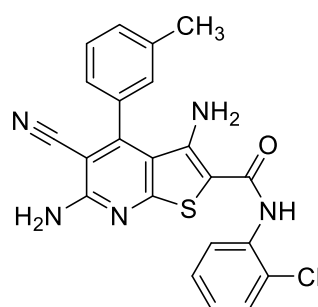

3,6-Diamino-*N*-(2-chlorophenyl)-4-(3-chlorophenyl)-5-cyanothieno[2,3-*b*]pyridine-2-carboxamide **9c** (KuSaSch027)

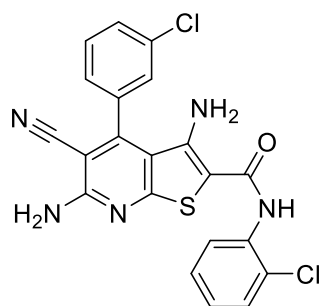

3,6-Diamino-5-cyano-*N*-(4-fluorophenyl)-4-(3-methylphenyl)thieno[2,3-*b*]pyridine-2-carboxamide **9g** (KuSaSch033)

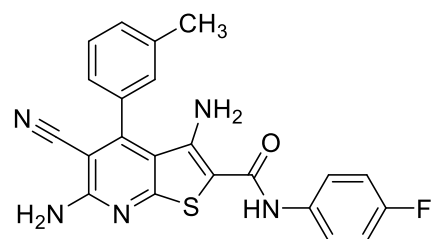

3,6-Diamino-4-(3-chlorophenyl)-5-cyano-*N*-(4-fluorophenyl)thieno[2,3-*b*]pyridine-2-carboxamide **9d** (KuSaSch028)

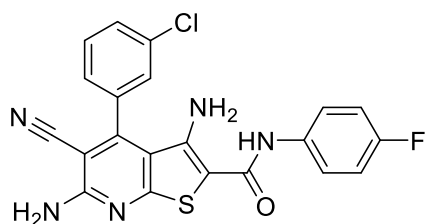

3,6-Diamino-*N*-(4-chlorophenyl)-5-cyano-4-(3-fluorophenyl)thieno[2,3-*b*]pyridine-2-carboxamide **9h** (KuSaSch037)

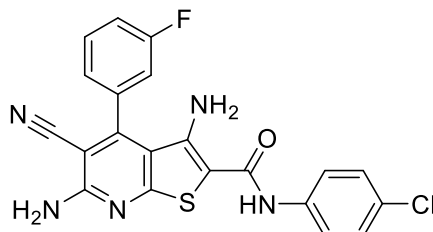

3,6-Diamino-5-cyano-4-(3-fluorophenyl)-*N*-(4-fluorophenyl)thieno[2,3-*b*]pyridine-2-carboxamide **9i** (KuSaSch038)

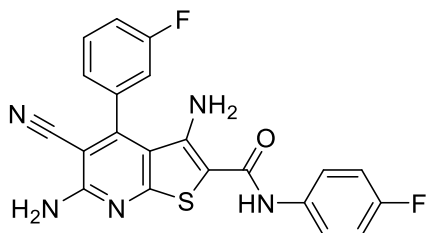

3,6-Diamino-5-cyano-*N*-cyclopropyl-4-(3-methylphenyl)thieno[2,3-*b*]pyridine-2-carboxamide **9m** (KuSaSch134)

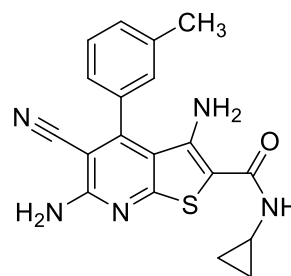

3,6-Diamino-5-cyano-*N*-methyl-4-(3-methylphenyl)thieno[2,3-*b*]pyridine-2-carboxamide **9j** (KuSaSch127)

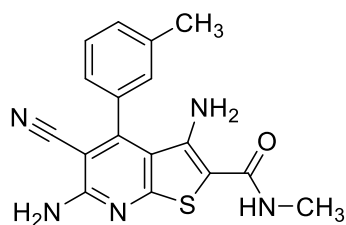

3,6-Diamino-5-cyano-*N*-(2-morpholinoethyl)-4-(3-methylphenyl)thieno[2,3-*b*]pyridine-2-carboxamide **9n** (KuSaSch135)

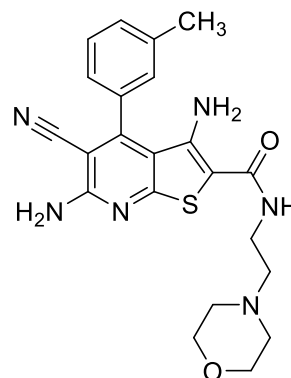

3,6-Diamino-5-cyano-*N*-heptyl-4-(3-methylphenyl)thieno[2,3-*b*]pyridine-2-carboxamide **9k** (KuSaSch129)

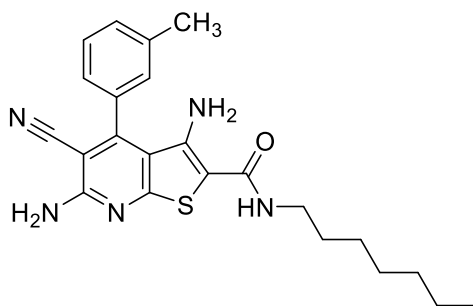

3,6-Diamino-5-cyano-*N*-(2-cyclopropylethyl)-4-(3-methylphenyl)thieno[2,3-*b*]pyridine-2-carboxamide **9o** (KuSaSch137)

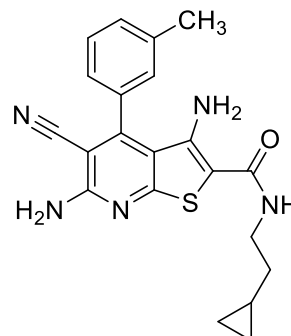

3,6-Diamino-5-cyano-*N*-isopropyl-4-(3-methylphenyl)thieno[2,3-*b*]pyridine-2-carboxamide **9l** (KuSaSch131)

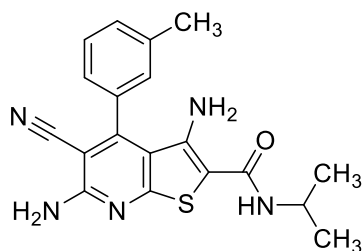

*tert*-Butyl 4-(3-chloro-4-[3,6-diamino-2-[(3-chlorophenyl)carbamoyl]-5-cyanothieno[2,3-*b*]pyridin-4-yl]phenyl)piperazine-1-carboxylate **9p** (KuSaSch041)

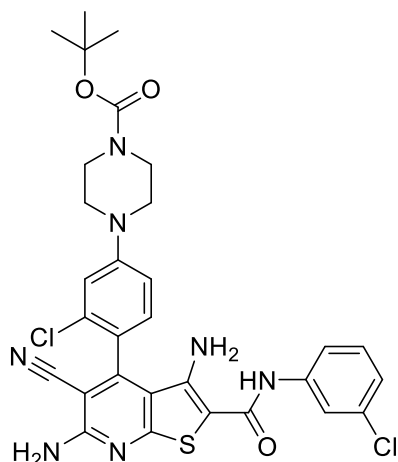

3,6-Diamino-4-[2-chloro-4-(piperazin-1-yl)phenyl]-*N*-(3-chlorophenyl)-5-cyanothieno[2,3-*b*]pyridine-2-carboxamide hydrochloride **9q** (KuSaSch043)

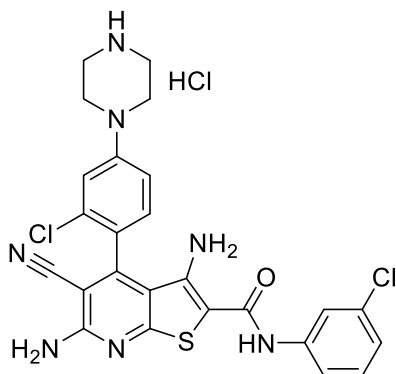

3,6-Diamino-4-(2-chloro-4-morpholinophenyl)-*N*-(3-chlorophenyl)-5-cyanothieno[2,3-*b*]pyridine-2-carboxamide **9r** (KuSaSch050)

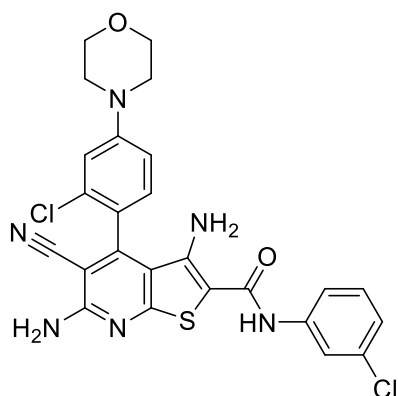

3,6-Diamino-4-[2-chloro-4-(pyrrolidin-1-yl)phenyl]-*N*-(3-chlorophenyl)-5-cyanothieno[2,3-*b*]pyridine-2-carboxamide **9s** (KuSaSch051)

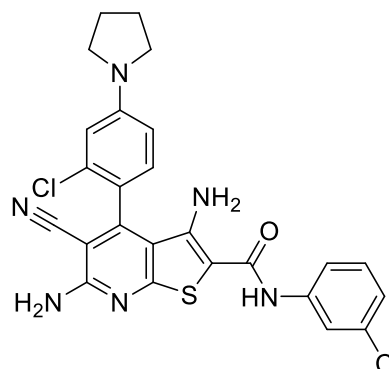

3,6-Diamino-4-[2-chloro-4-(pyrrolidin-1-yl)phenyl]-*N*-(2-chlorophenyl)-5-cyanothieno[2,3-*b*]pyridine-2-carboxamide **9t** (KuSaSch055)

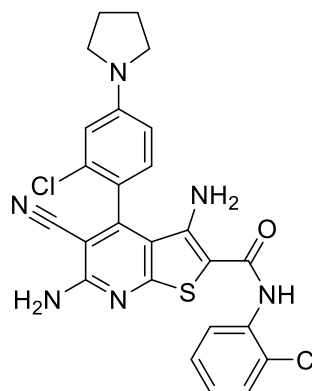

3,6-Diamino-4-(2-chloro-4-morpholinophenyl)-*N*-(2-chlorophenyl)-5-cyanothieno[2,3-*b*]pyridine-2-carboxamide **9u** (KuSaSch056)

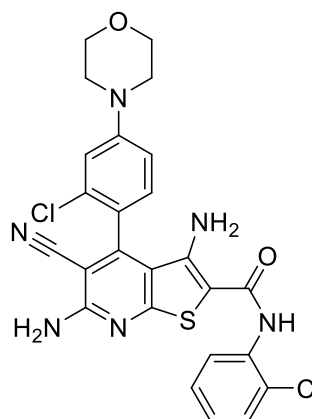

3,6-Diamino-4-(2-chloro-4-morpholinophenyl)-5-cyanothieno[2,3-*b*]pyridine-2-carboxamide **9v**  
(KuSaSch057)

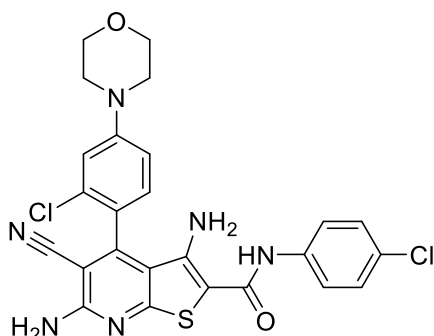

*tert*-Butyl {2-[(3-chloro-4-(3,6-diamino-2-[(3-chlorophenyl)carbamoyl]-5-cyanothieno[2,3-*b*]pyridin-4-yl)phenyl)(methylamino)ethyl]carbamate **9w**  
(KuSaSch058)

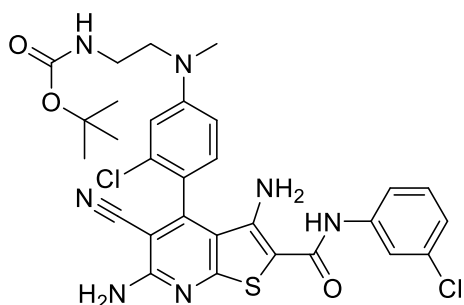

3,6-Diamino-4-(2-chloro-4-morpholinophenyl)-5-cyano-*N*-(4-fluorophenyl)thieno[2,3-*b*]pyridine-2-carboxamide **9x** (KuSaSch059)

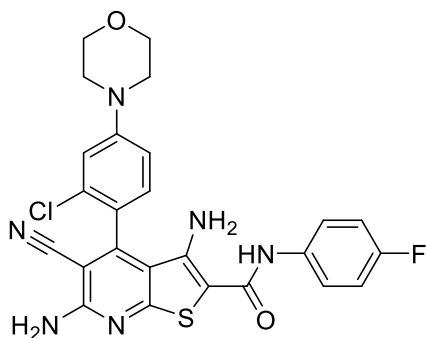

*tert*-Butyl {2-[(3-chloro-4-(3,6-diamino-2-[(4-chlorophenyl)carbamoyl]-5-cyanothieno[2,3-*b*]pyridin-4-yl)phenyl)(methylamino)ethyl]carbamate **9y**  
(KuSaSch060)

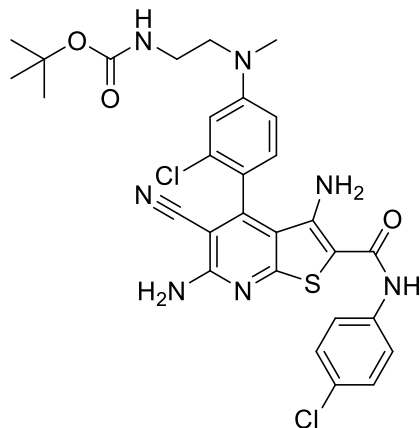

3,6-Diamino-4-[2-chloro-4-(pyrrolidin-1-yl)phenyl]-*N*-(4-chlorophenyl)-5-cyanothieno[2,3-*b*]pyridine-2-carboxamide **9z** (KuSaSch063)

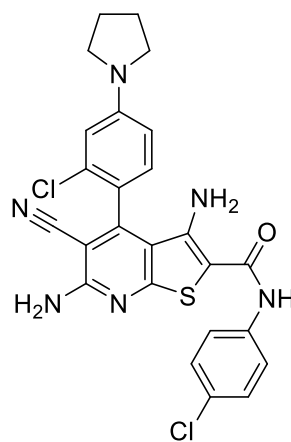

3,6-Diamino-4-[2-chloro-4-(pyrrolidin-1-yl)phenyl]-5-cyano-*N*-(4-fluorophenyl)thieno[2,3-*b*]pyridine-2-carboxamide **9aa** (KuSaSch064)

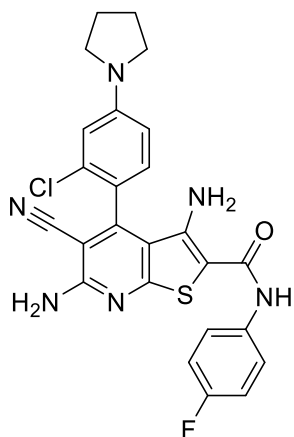

*tert*-Butyl {2-[(3-chloro-4-{3,6-diamino-5-cyano-2-[(4-fluorophenyl)carbamoyl]thieno[2,3-*b*]pyridin-4-yl]phenyl)(methyl)amino]ethyl}carbamate **9ac** (KuSaSch073)

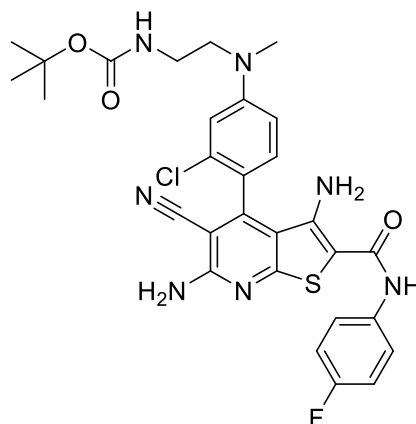

3,6-Diamino-4-(2-chloro-4-[(2-(dimethylamino)ethyl)(methyl)amino]phenyl)-5-cyano-*N*-(4-fluoro-phenyl)thieno[2,3-*b*]pyridine-2-carboxamide **9ab** (KuSaSch067)

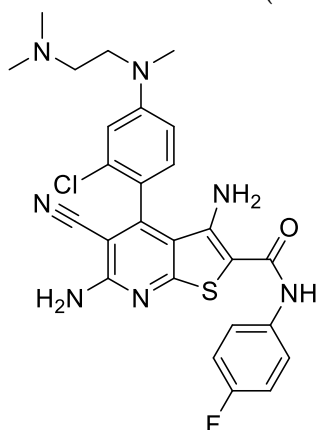

*tert*-Butyl {2-[(3-chloro-4-{3,6-diamino-2-[(2-chlorophenyl)carbamoyl]-5-cyanothieno[2,3-*b*]pyridin-4-yl]phenyl)(methyl)amino]ethyl}carbamate **9ad** (KuSaSch074)

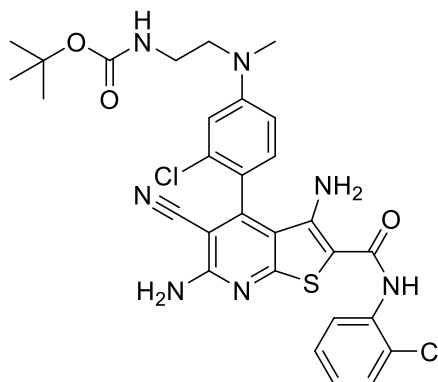

3,6-Diamino-4-[4-[(2-aminoethyl)(methyl)amino]-2-chlorophenyl]-*N*-(3-chlorophenyl)-5-cyano-thieno[2,3-*b*]pyridine-2-carboxamide hydrochloride **9ae** (KuSaSch075)

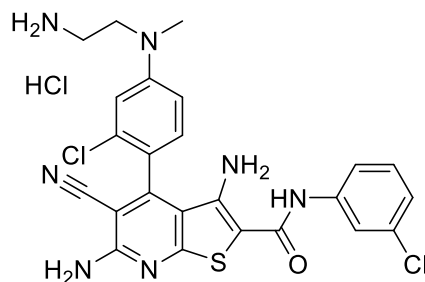

3,6-Diamino-4-(2-chloro-4-[[2-(dimethylamino)ethyl](methyl)amino]phenyl)-N-(3-chlorophenyl)-5-cyanothieno[2,3-*b*]pyridine-2-carboxamide **9af** (KuSaSch090)

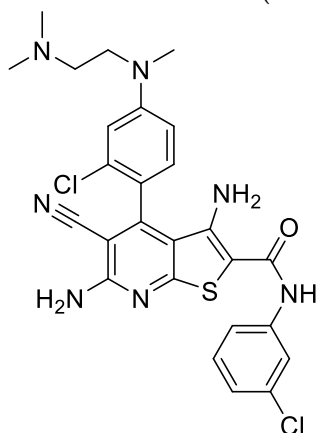

*tert*-Butyl 4-(4-{3-amino-2-[(4-chlorophenyl)carbamoyl]-6,7-dihydro-5*H*-cyclopenta[*b*]thieno[3,2-*e*]pyridin-4-yl]-3-chlorophenyl)piperazine-1-carboxylate **17a** (KuSaSch095)

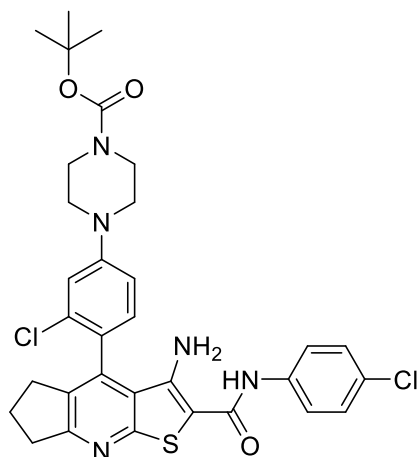

3-Amino-*N*-(4-chlorophenyl)-4-phenyl-6,7-dihydro-5*H*-cyclopenta[*b*]thieno[3,2-*e*]pyridine-2-carboxamide **17b** (KuSaSch100)

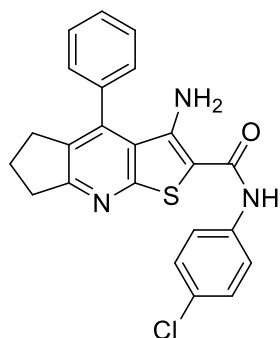

3-Amino-*N*-(4-fluorophenyl)-4-phenyl-6,7-dihydro-5*H*-cyclopenta[*b*]thieno[3,2-*e*]pyridine-2-carboxamide **17c** (KuSaSch101)

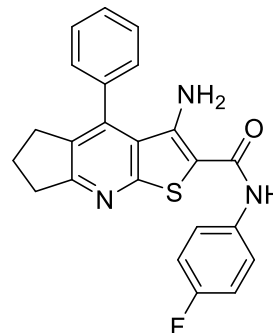

3-Amino-*N*-(4-chlorophenyl)-4-phenyl-5,6,7,8-tetrahydrothieno[2,3-*b*]quinoline-2-carboxamide **17d** (KuSaSch105)

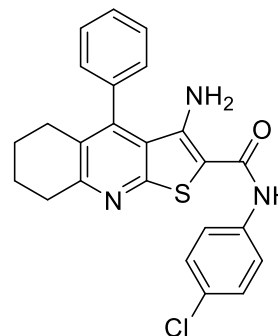

3-Amino-*N*-(4-chlorophenyl)-4-(3-methylphenyl)-5,6,7,8-tetrahydrothieno[2,3-*b*]quinoline-2-carboxamide **17e** (KuSaSch107)

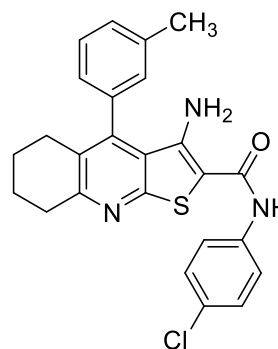

3-Amino-*N*-(4-chlorophenyl)-4-(3-methylphenyl)-6,7-dihydro-5*H*-cyclopenta[*b*]thieno[3,2-*e*]pyridine-2-carboxamide **17f** (KuSaSch110)

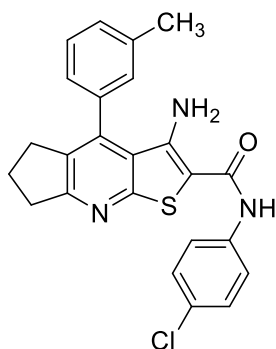

3-Amino-2-[(4-chlorophenyl)carbamoyl]-6-methyl-4-(3-methylphenyl)thieno[2,3-*b*]pyridine-5-carboxylic acid **17i** (KuSaSch114)

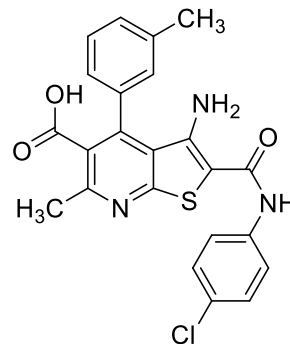

*tert*-Butyl 3-amino-2-[(4-chlorophenyl)carbamoyl]-6-methyl-4-phenylthieno[2,3-*b*]pyridine-5-carboxylate **17g** (KuSaSch111)

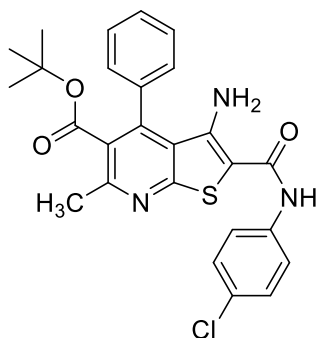

3-Amino-2-[(4-chlorophenyl)carbamoyl]-6-methyl-4-phenylthieno[2,3-*b*]pyridine-5-carboxylic acid **17j** (KuSaSch115)

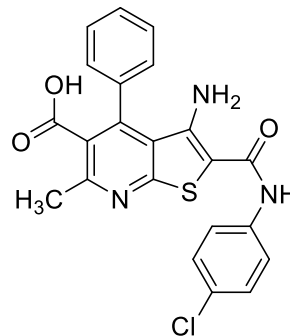

*tert*-Butyl 3-amino-2-[(4-chlorophenyl)carbamoyl]-6-methyl-4-(3-methylphenyl)thieno[2,3-*b*]pyridine-5-carboxylate **17h** (KuSaSch112)

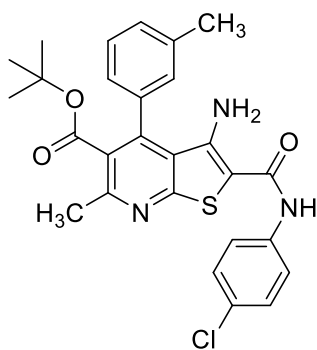

*tert*-Butyl 4-(4-[3-amino-2-[(4-chlorophenyl)carbamoyl]-5,6,7,8-tetrahydrothieno[2,3-*b*]quinolin-4-yl]-3-chlorophenyl)piperazine-1-carboxylate **17k** (KuSaSch118)

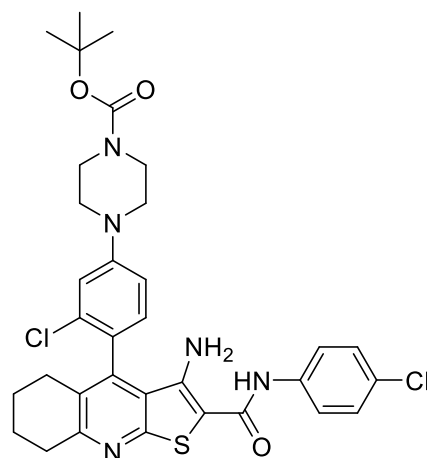



*tert*-Butyl 4-(4-[3-amino-2-[(4-chlorophenyl)carbamoyl]-6-methylthieno[2,3-*b*]pyridin-4-yl]-3-chlorophenyl)piperazine-1-carboxylate **171** (KuSaSch122)

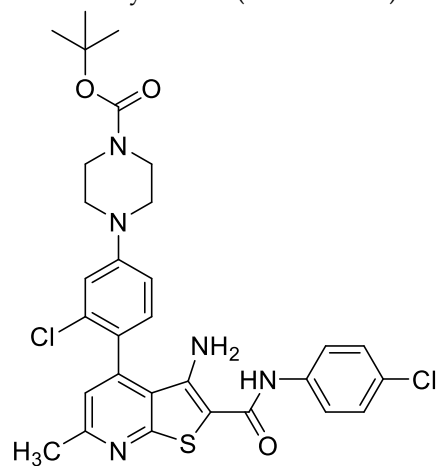

Figure S2:  $^1\text{H-NMR}$  spectrum of **9a** (KuSaSch018).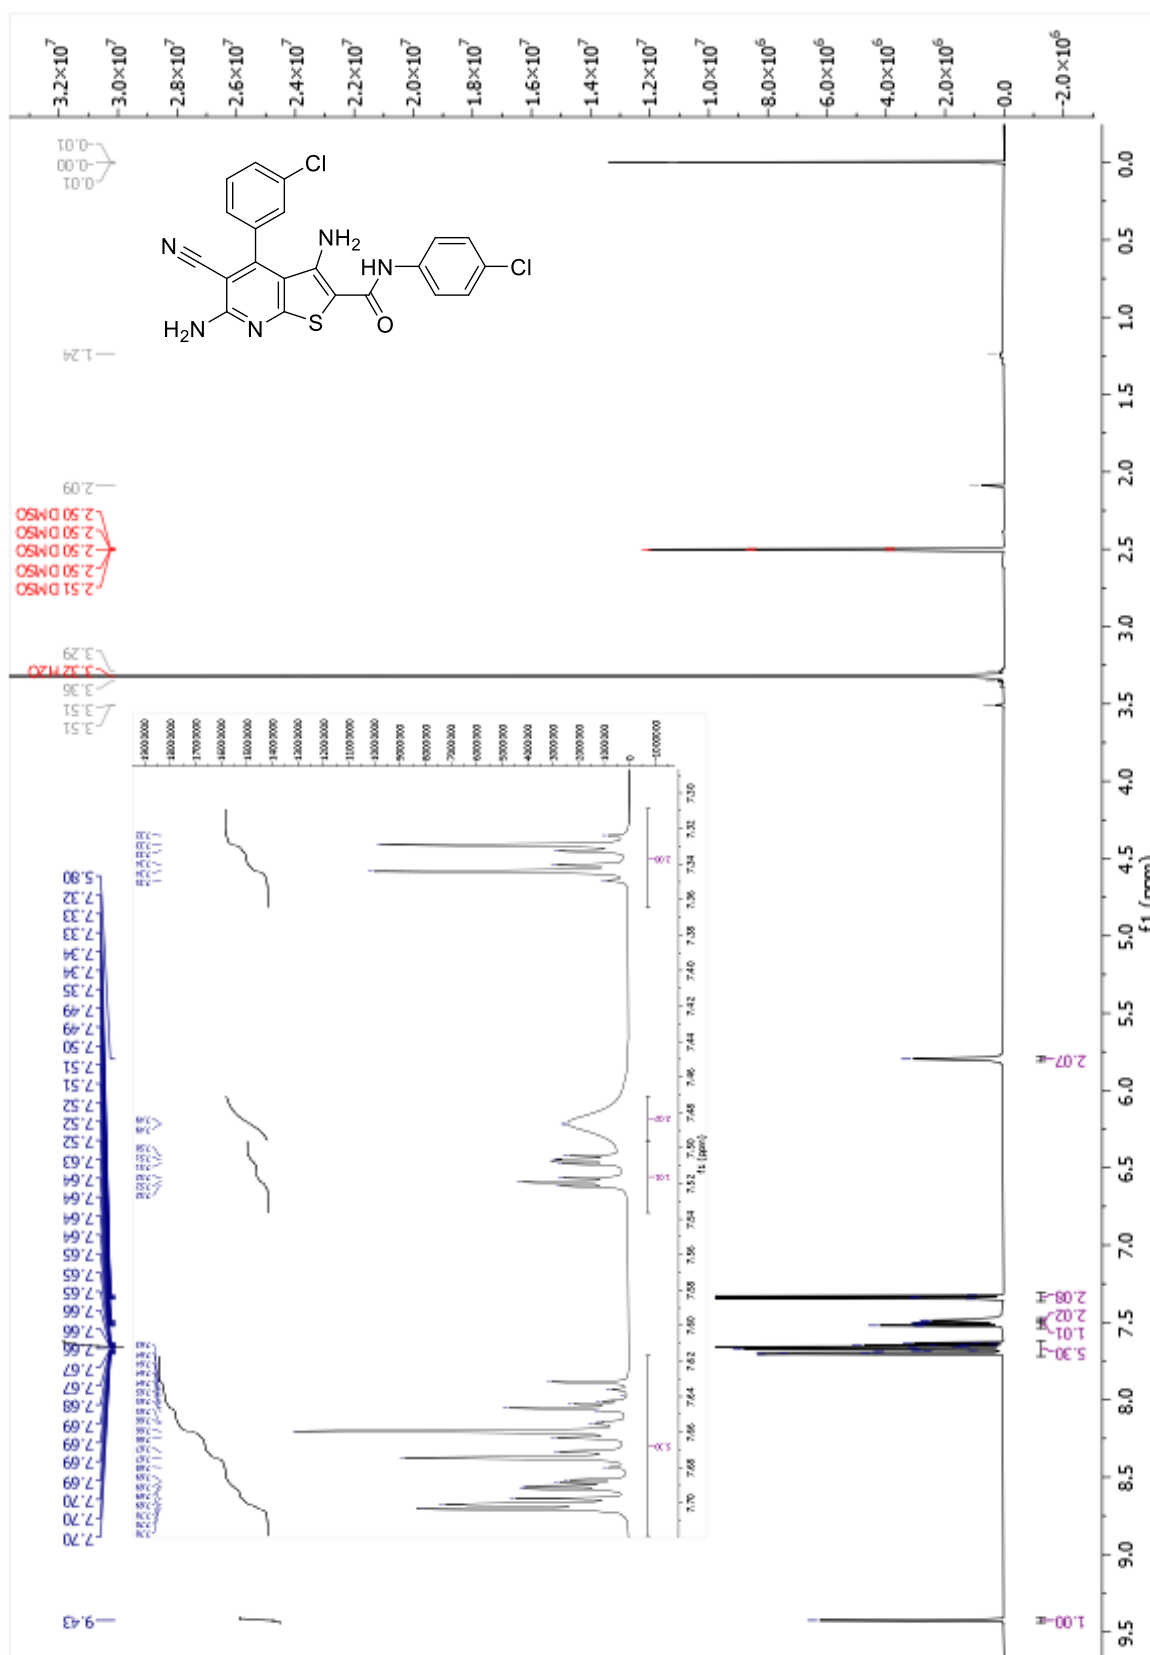

Figure S3:  $^{13}\text{C}$ -NMR spectrum of **9a** (KuSaSch018).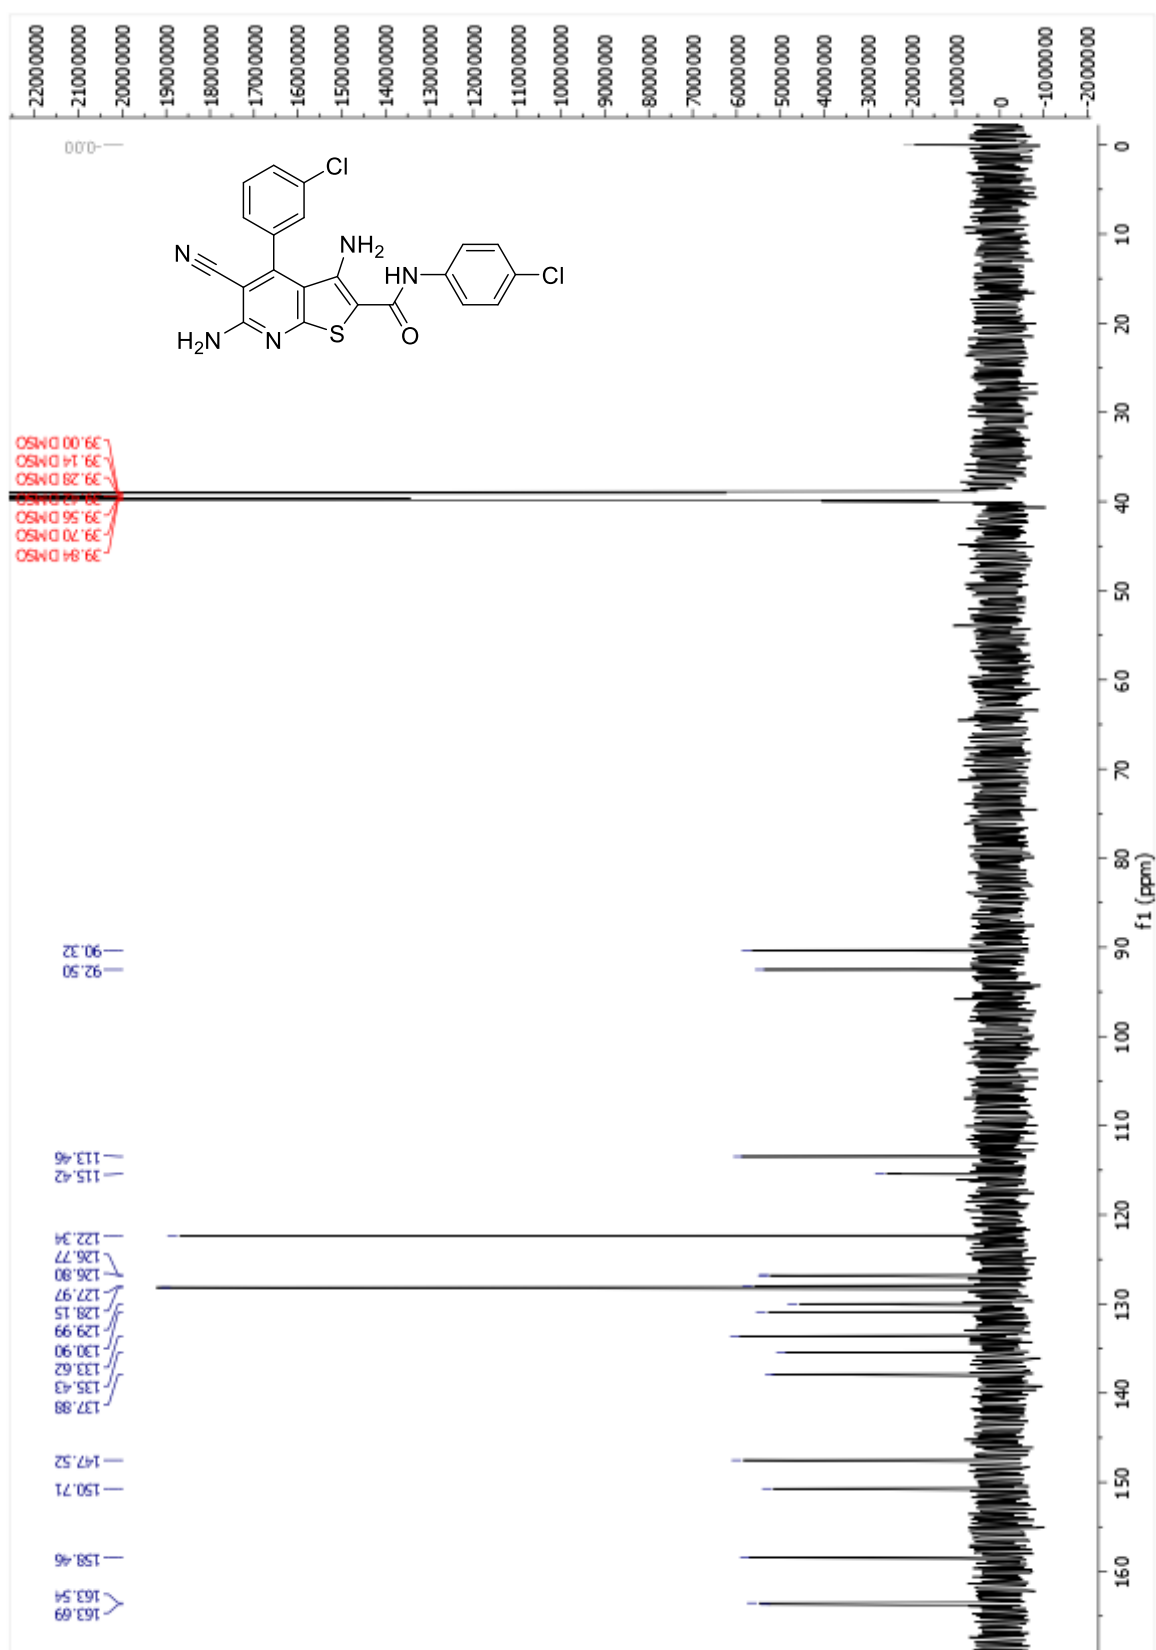

Figure S4: IR spectrum of **9a** (KuSaSch018).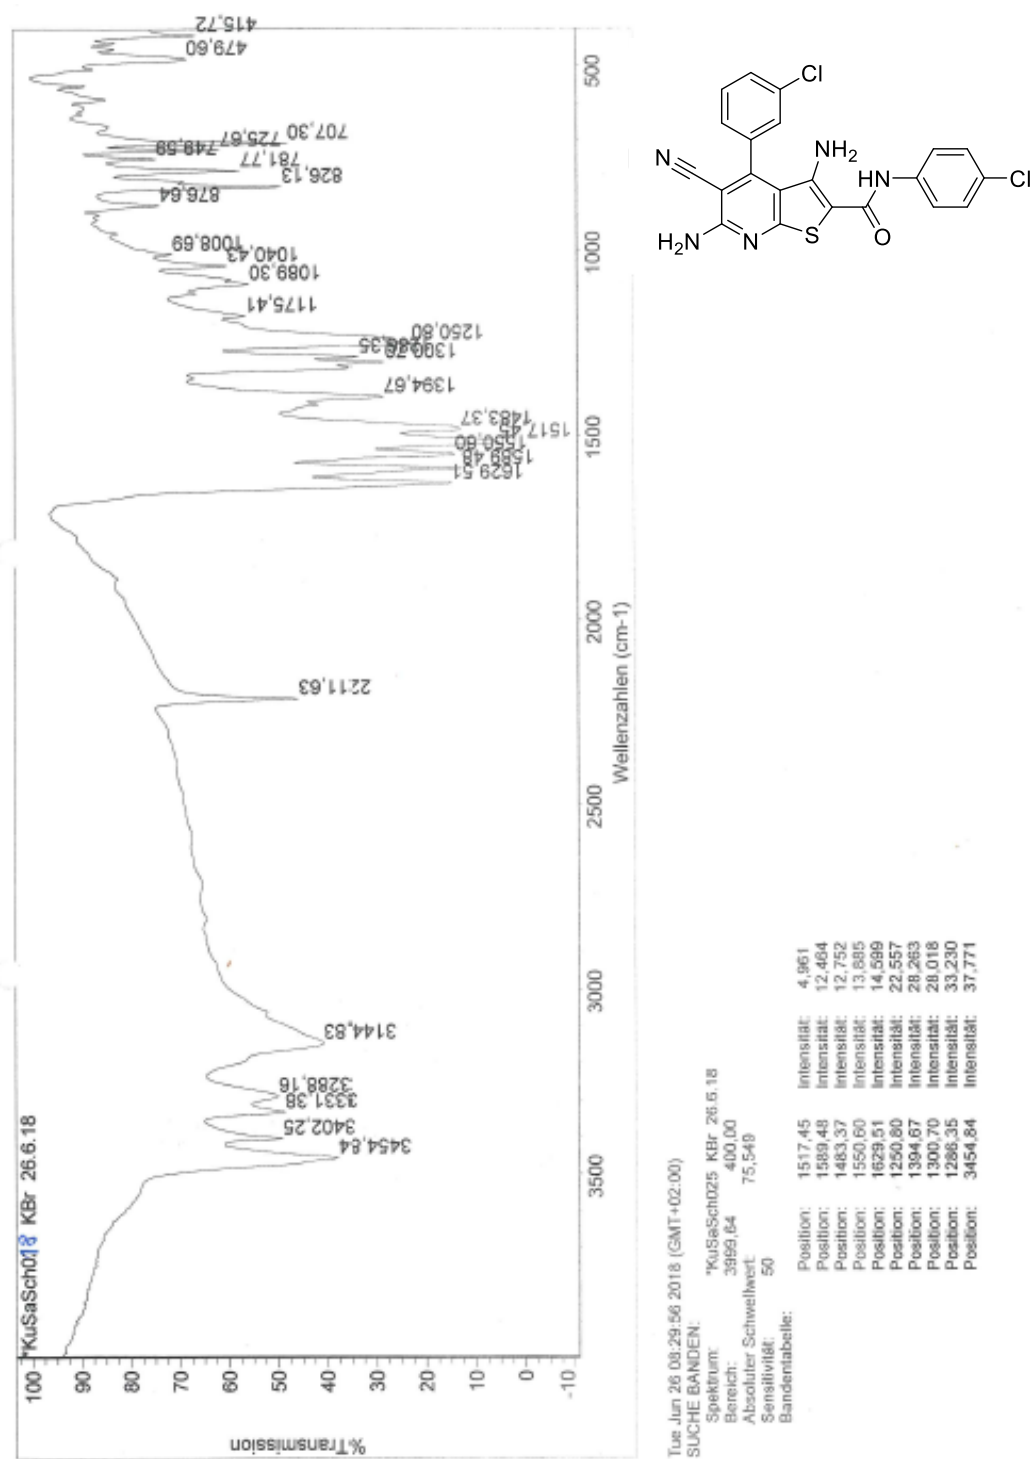

Figure S5: APCI-MS spectrum of **9a** (KuSaSch018).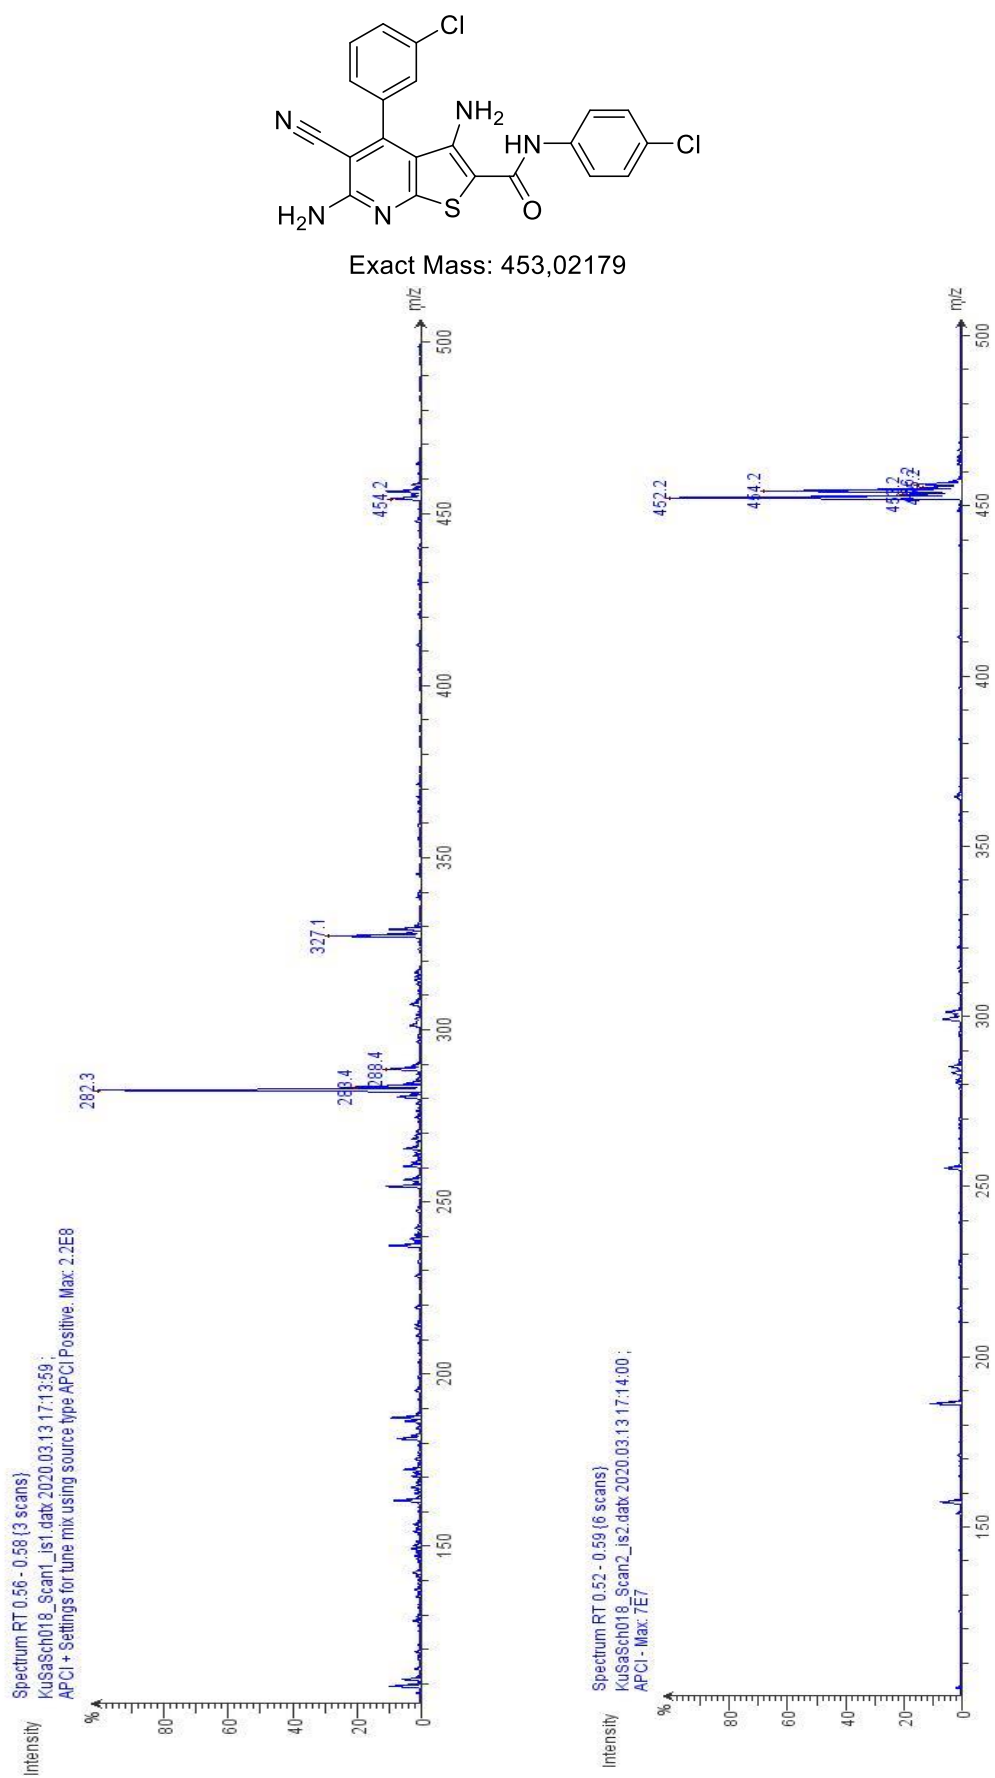

Figure S6:  $^1\text{H-NMR}$  spectrum of **9e** (KuSaSch031).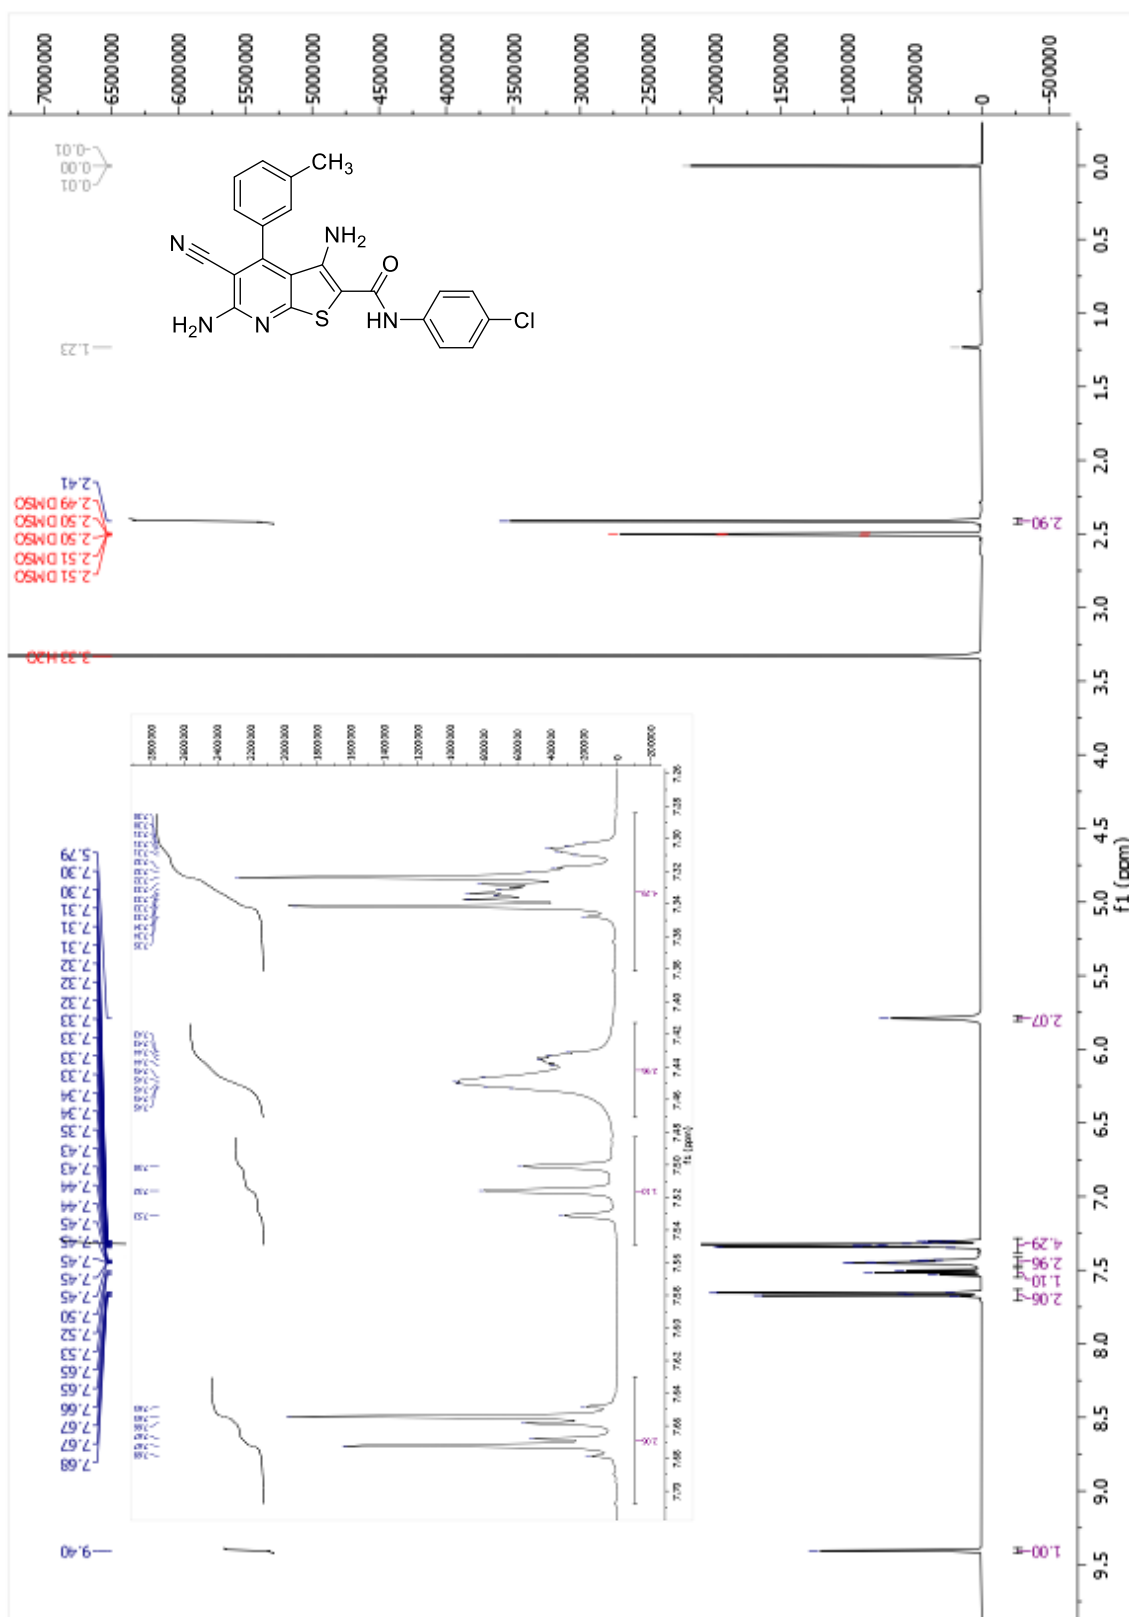

Figure S7:  $^{13}\text{C}$ -NMR spectrum of **9e** (KuSaSch031).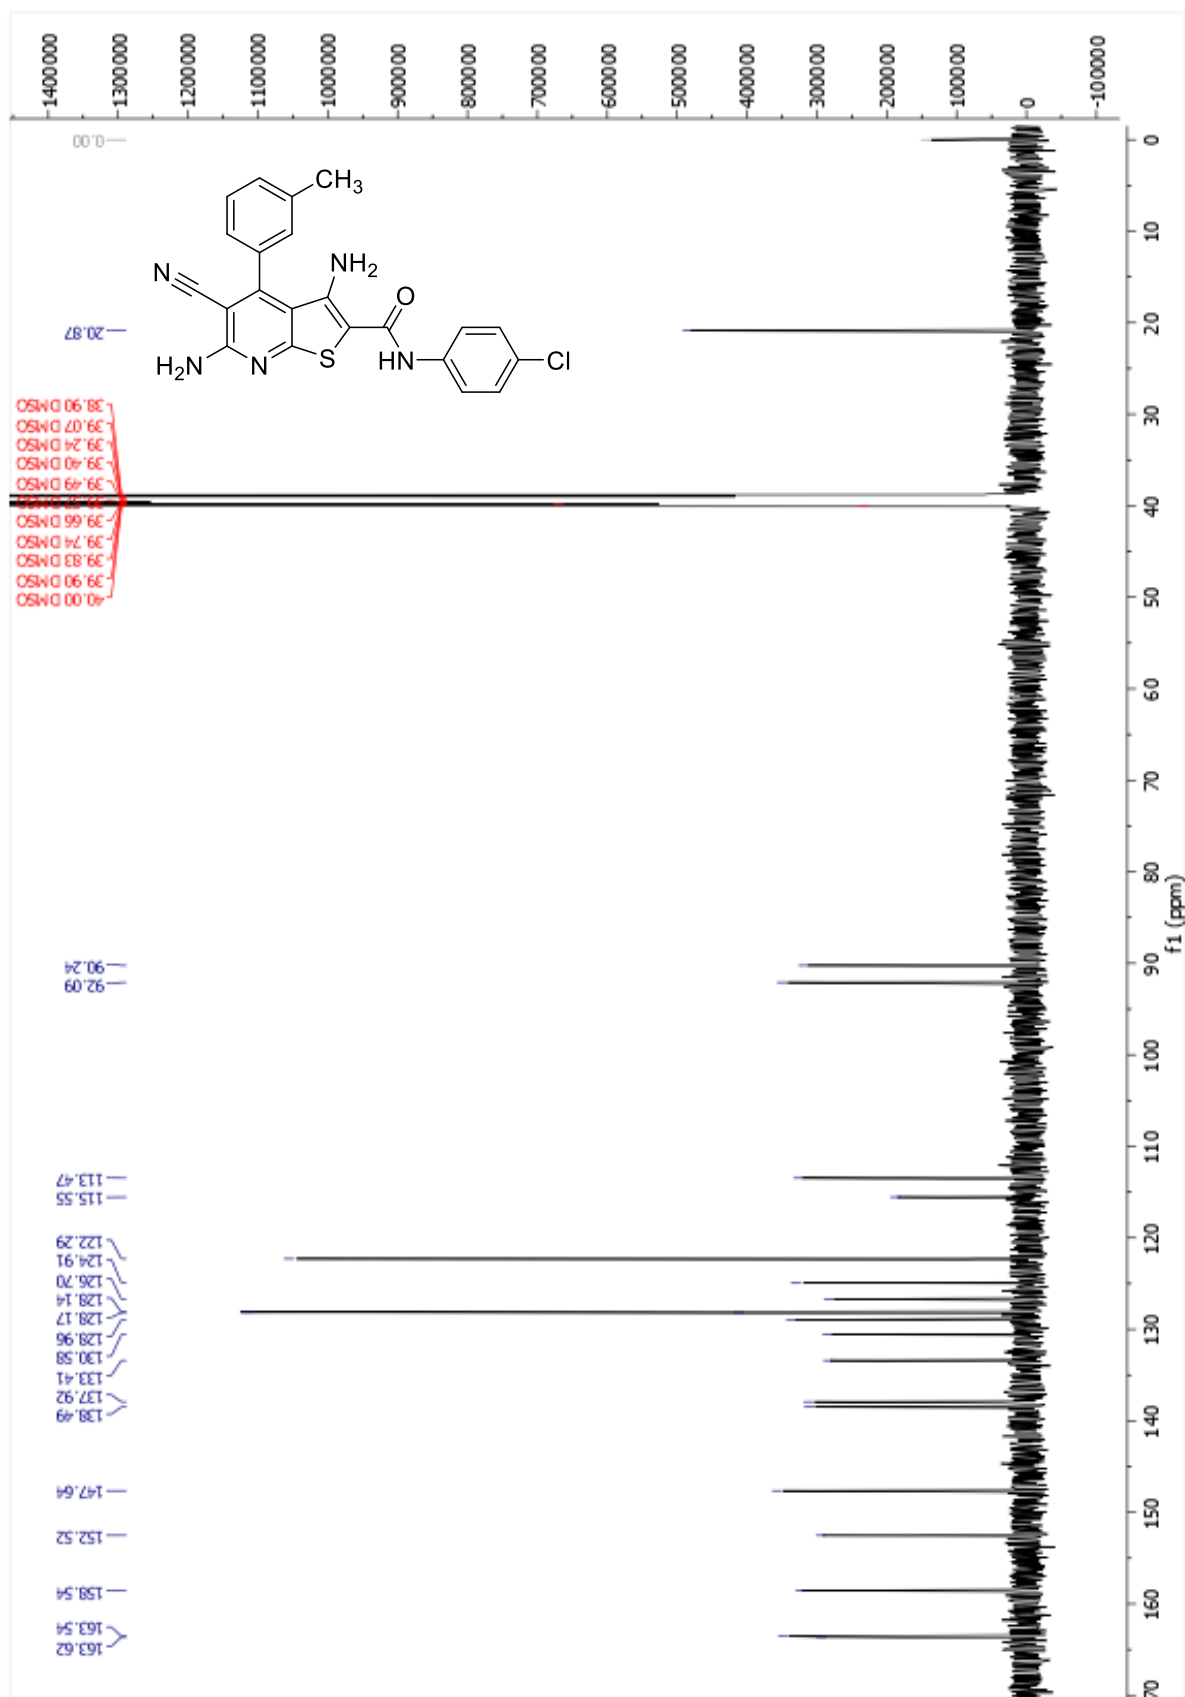

Figure S8: IR spectrum of **9e** (KuSaSch031).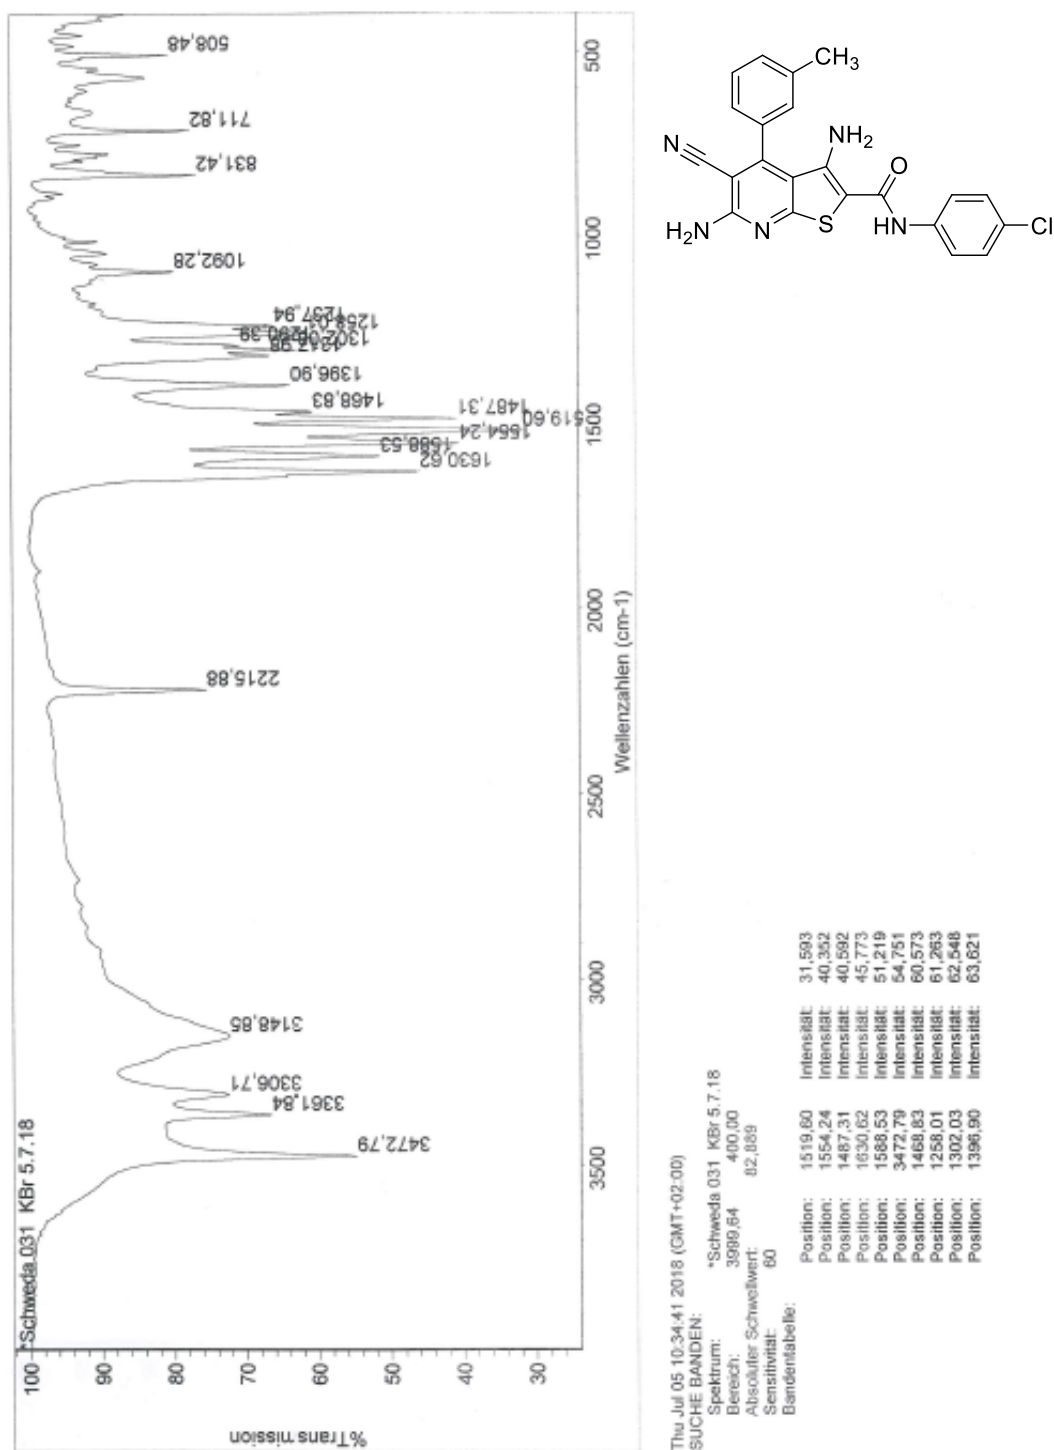



Figure S9: APCI-MS spectrum of **9e** (KuSaSch031).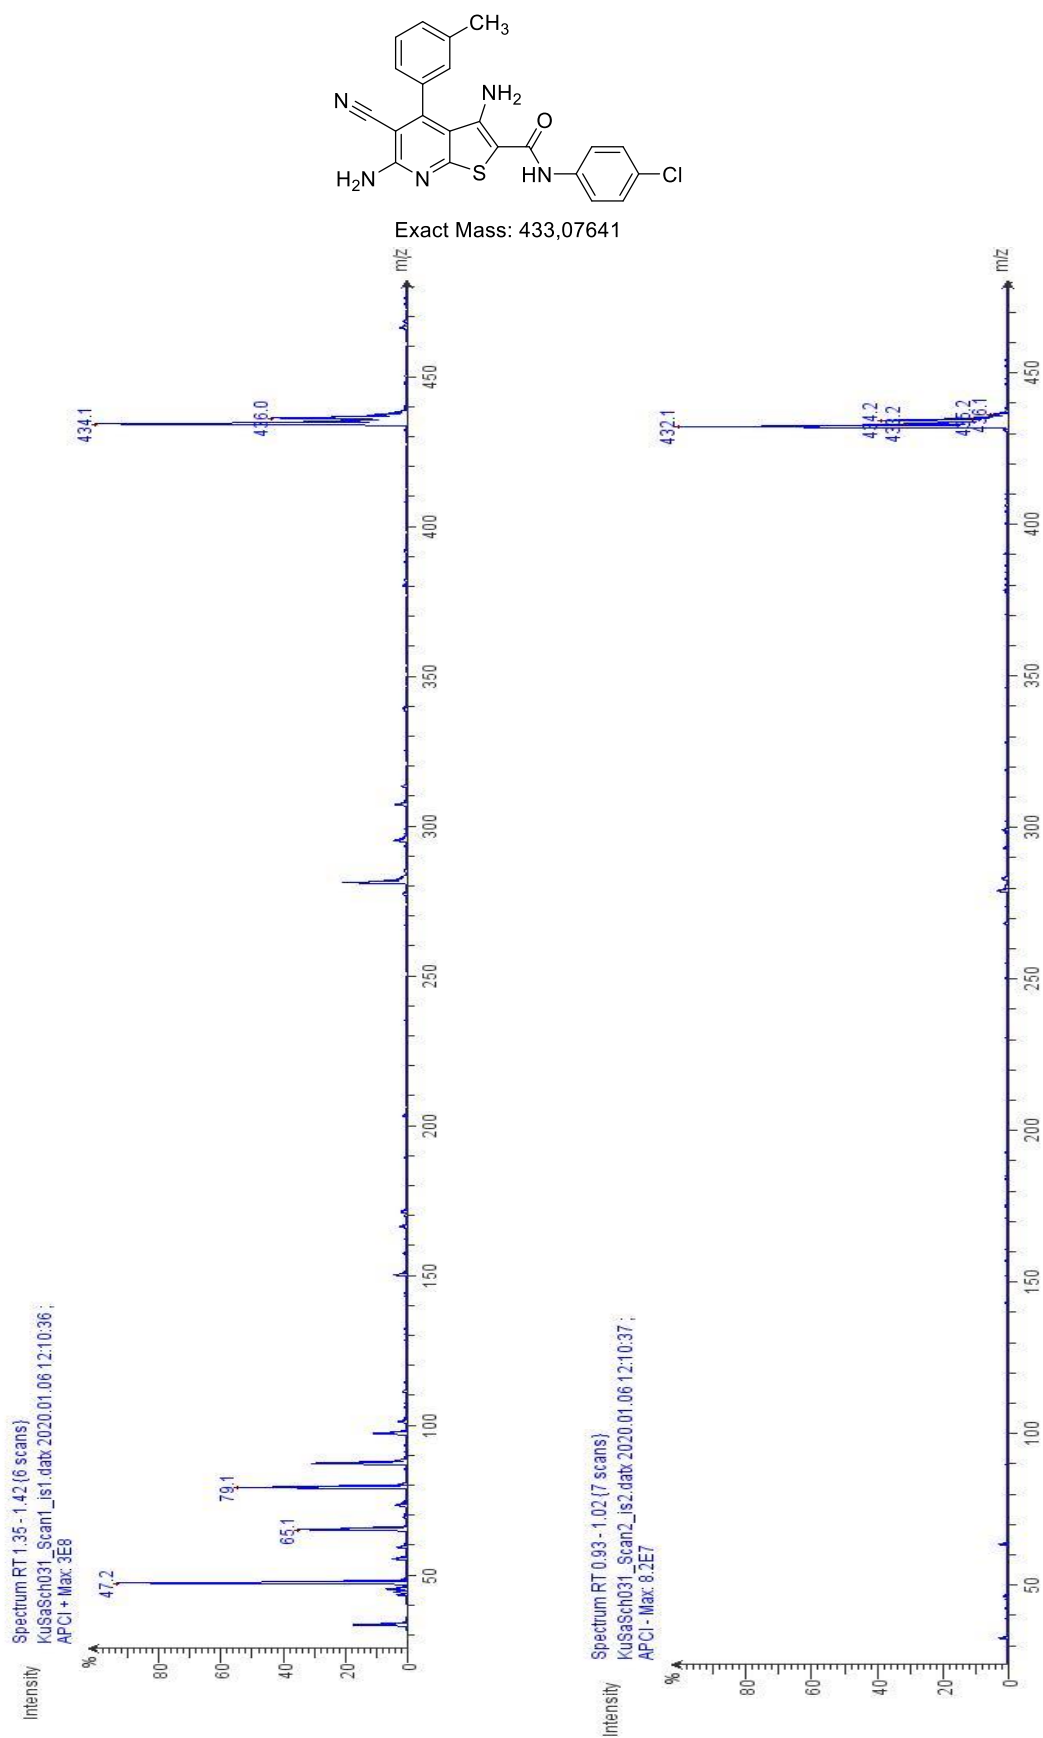

Figure S10:  $^1\text{H-NMR}$  spectrum of **9j** (KuSaSch127).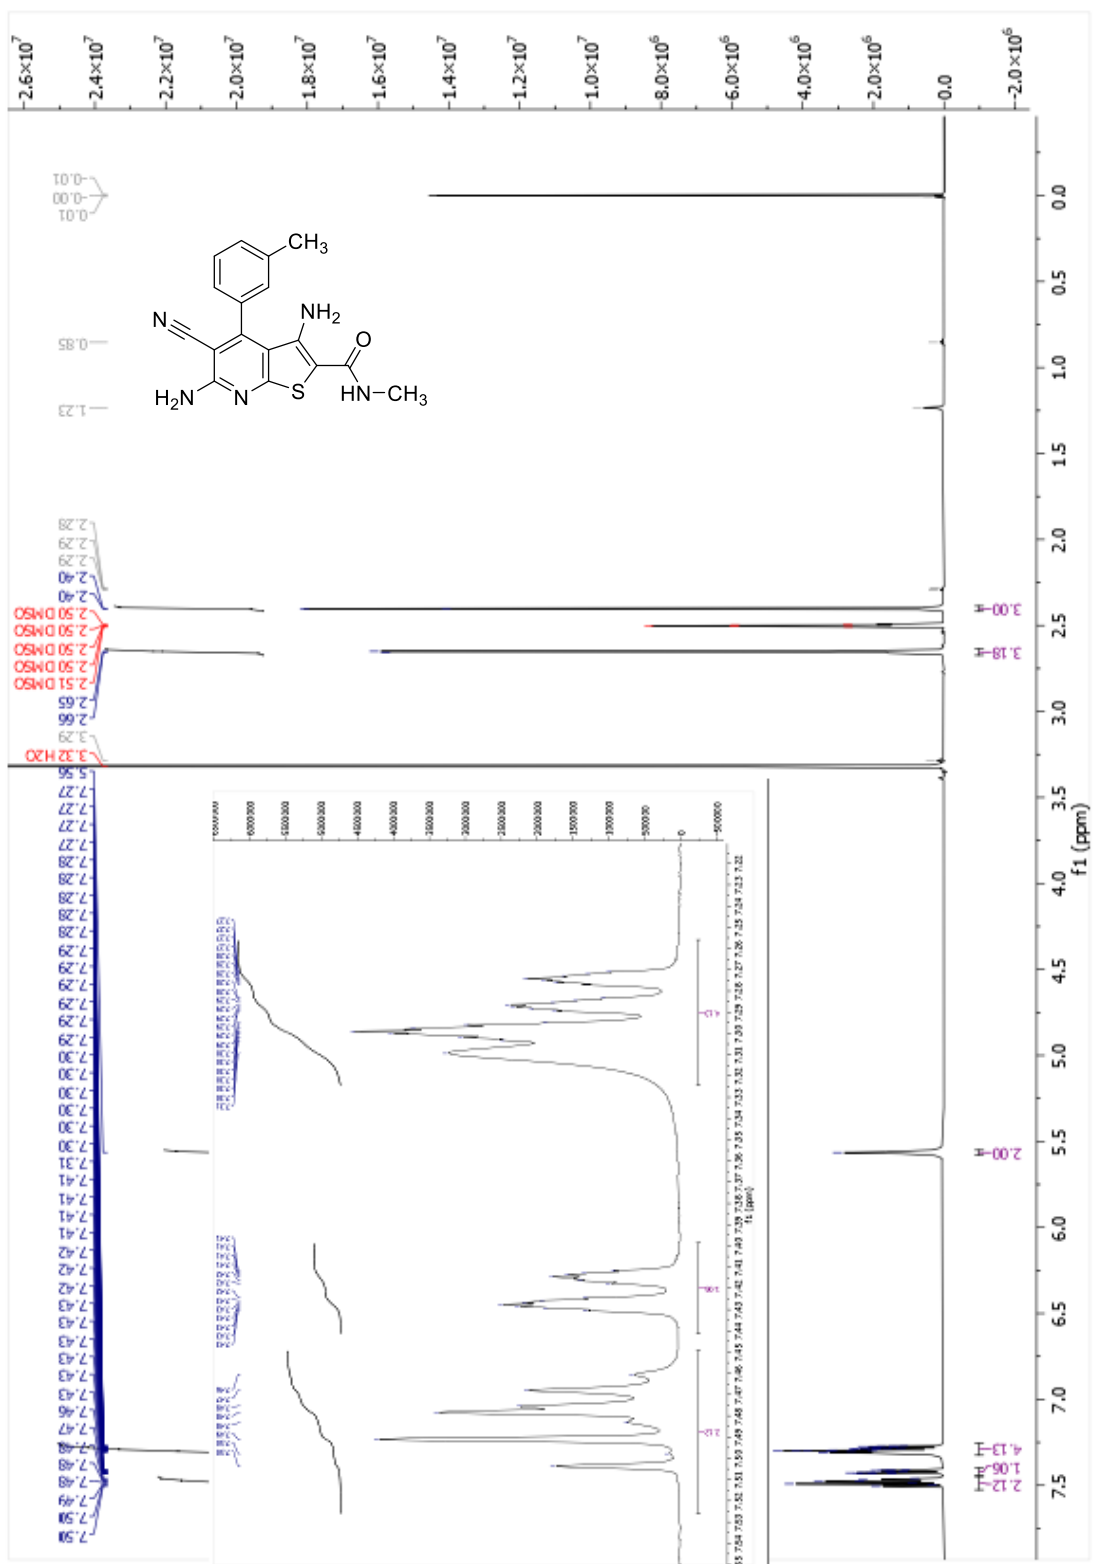

Figure S11:  $^{13}\text{C}$ -NMR spectrum of **9j** (KuSaSch127).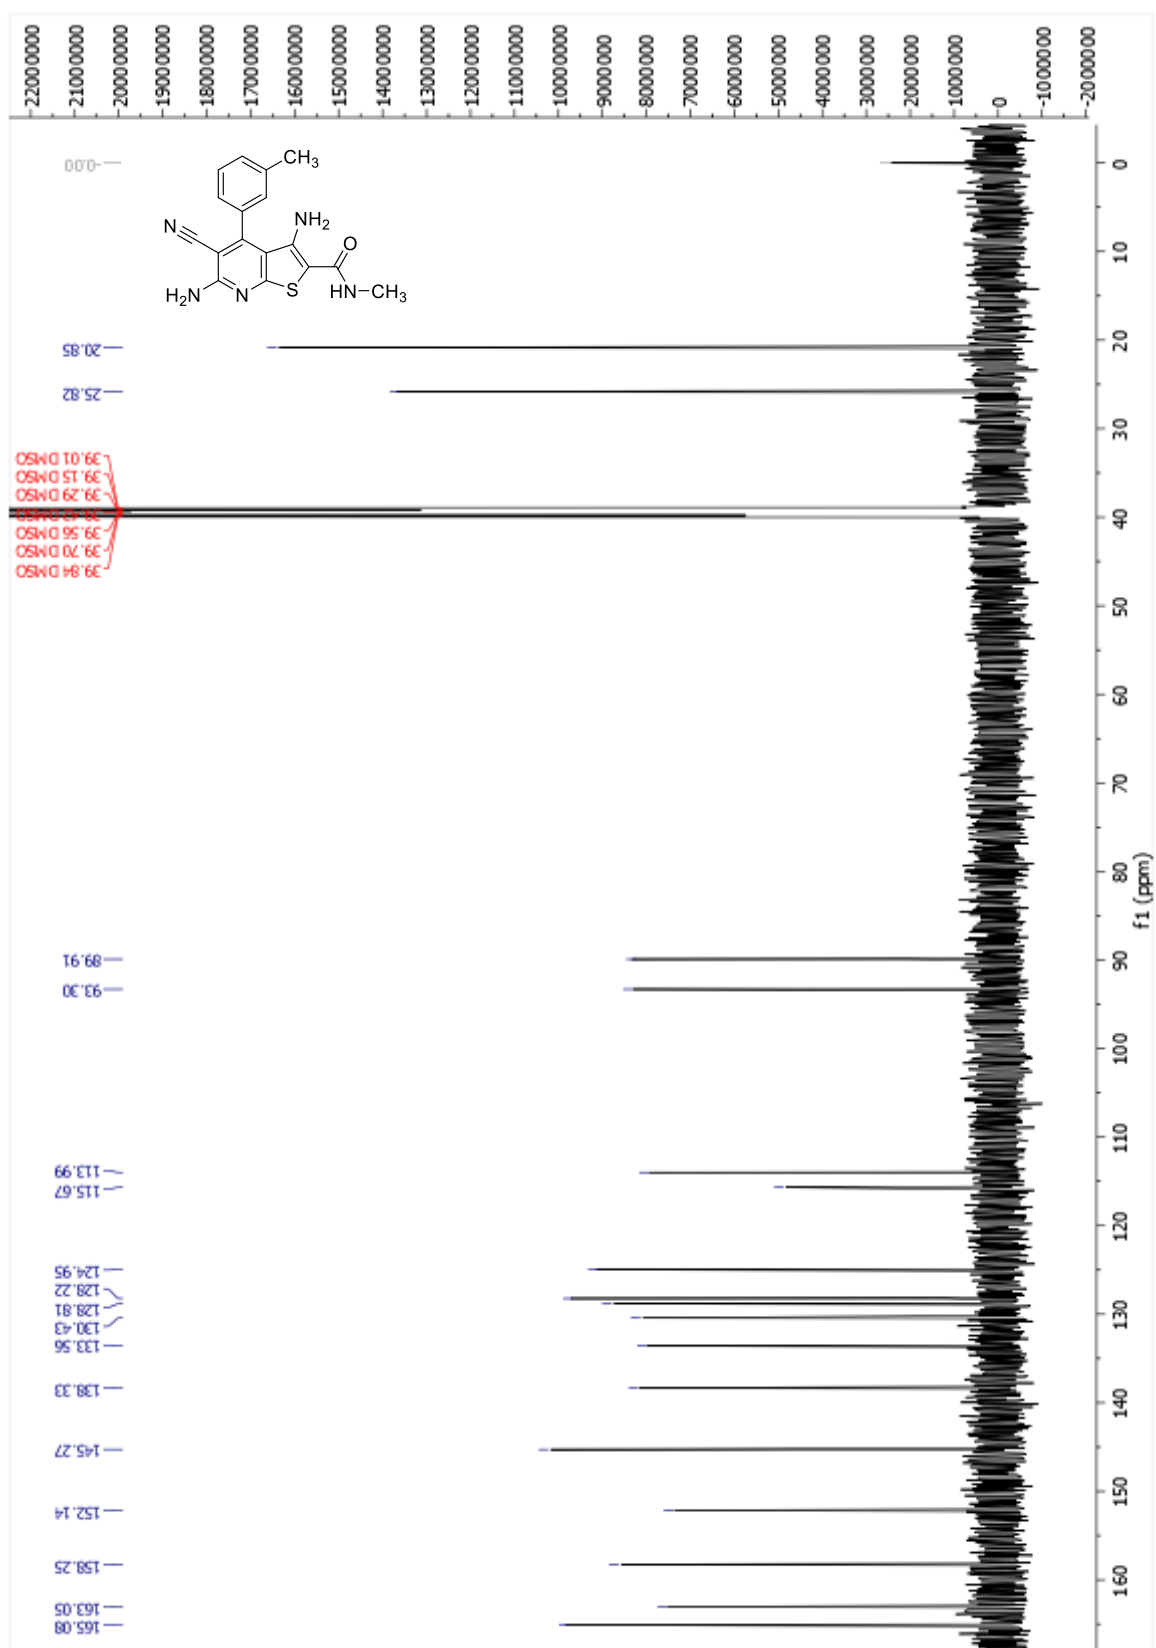

Figure S12: IR spectrum of 9j (KuSaSch127).

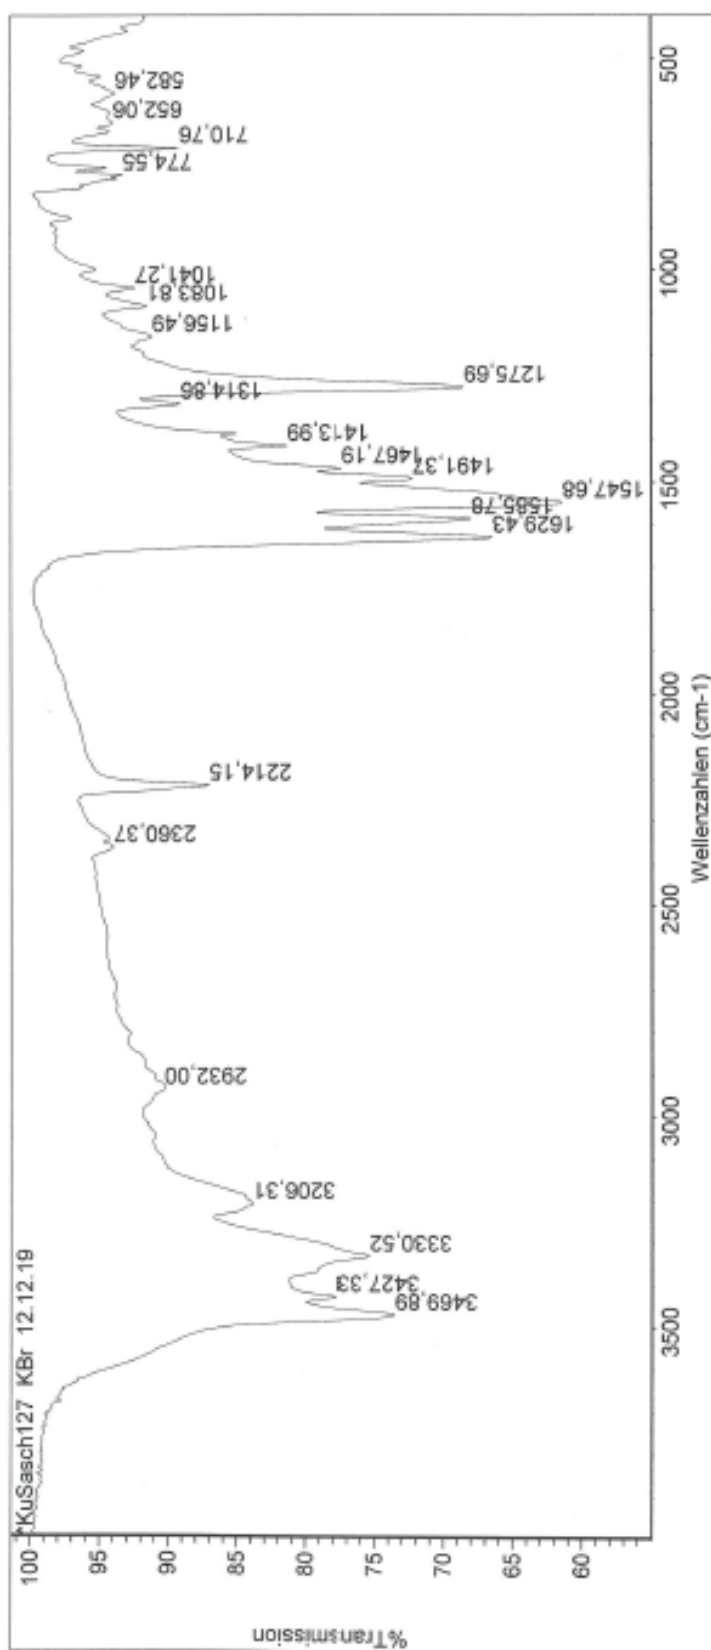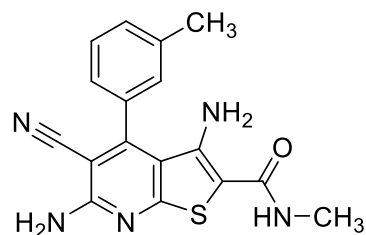

Thu Dez 12 11:18:13 2019 (GMT+01:00)

SUCHE BANDEN:

Spektrum: \*KuSaSch127 KBr 12.12.19

Bereich: 3999,64 400,00

Absoluter Schwellwert: 94,207

Sensitivität: 50

Bandentabelle:

| Position: | Intensität: |
|-----------|-------------|
| 1547,68   | 61,382      |
| 1629,43   | 66,423      |
| 1585,78   | 67,954      |
| 1275,69   | 68,481      |
| 1491,37   | 72,201      |
| 3469,89   | 73,509      |
| 3330,52   | 75,346      |

Figure S13: APCI-MS spectrum of **9j** (KuSaSch127).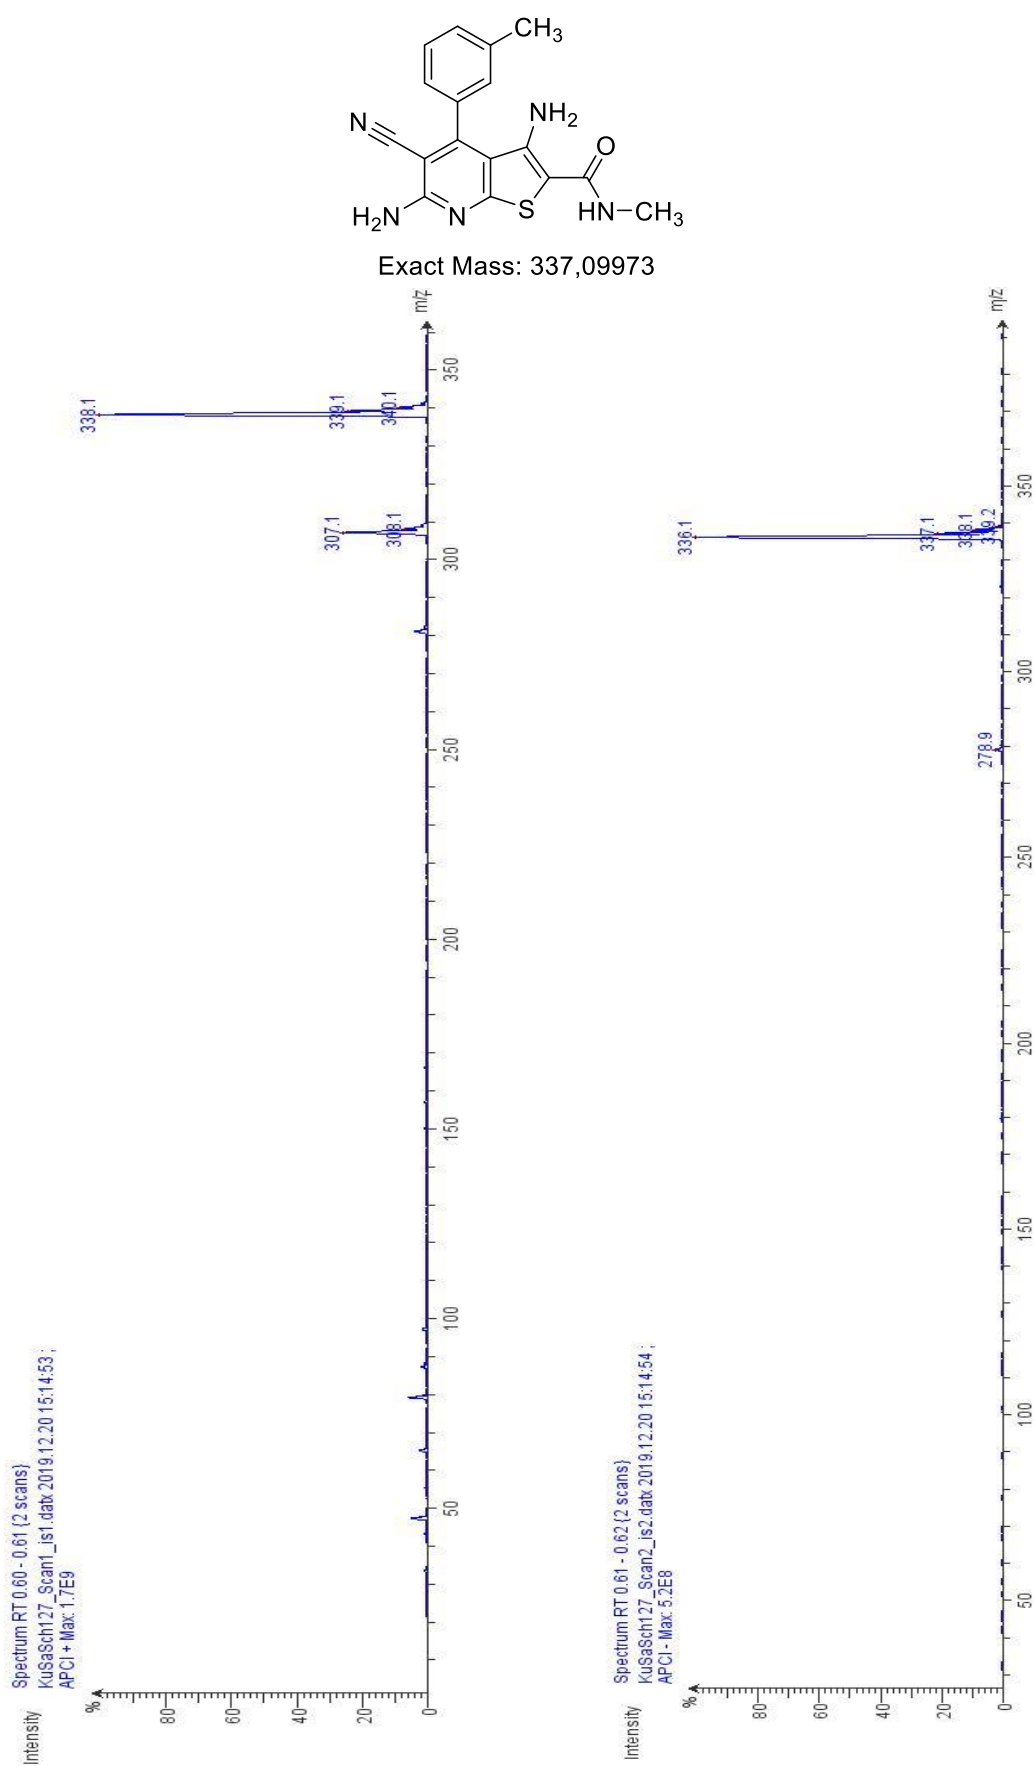

Figure S14: <sup>1</sup>H-NMR spectrum of **9m** (KuSaSch134).

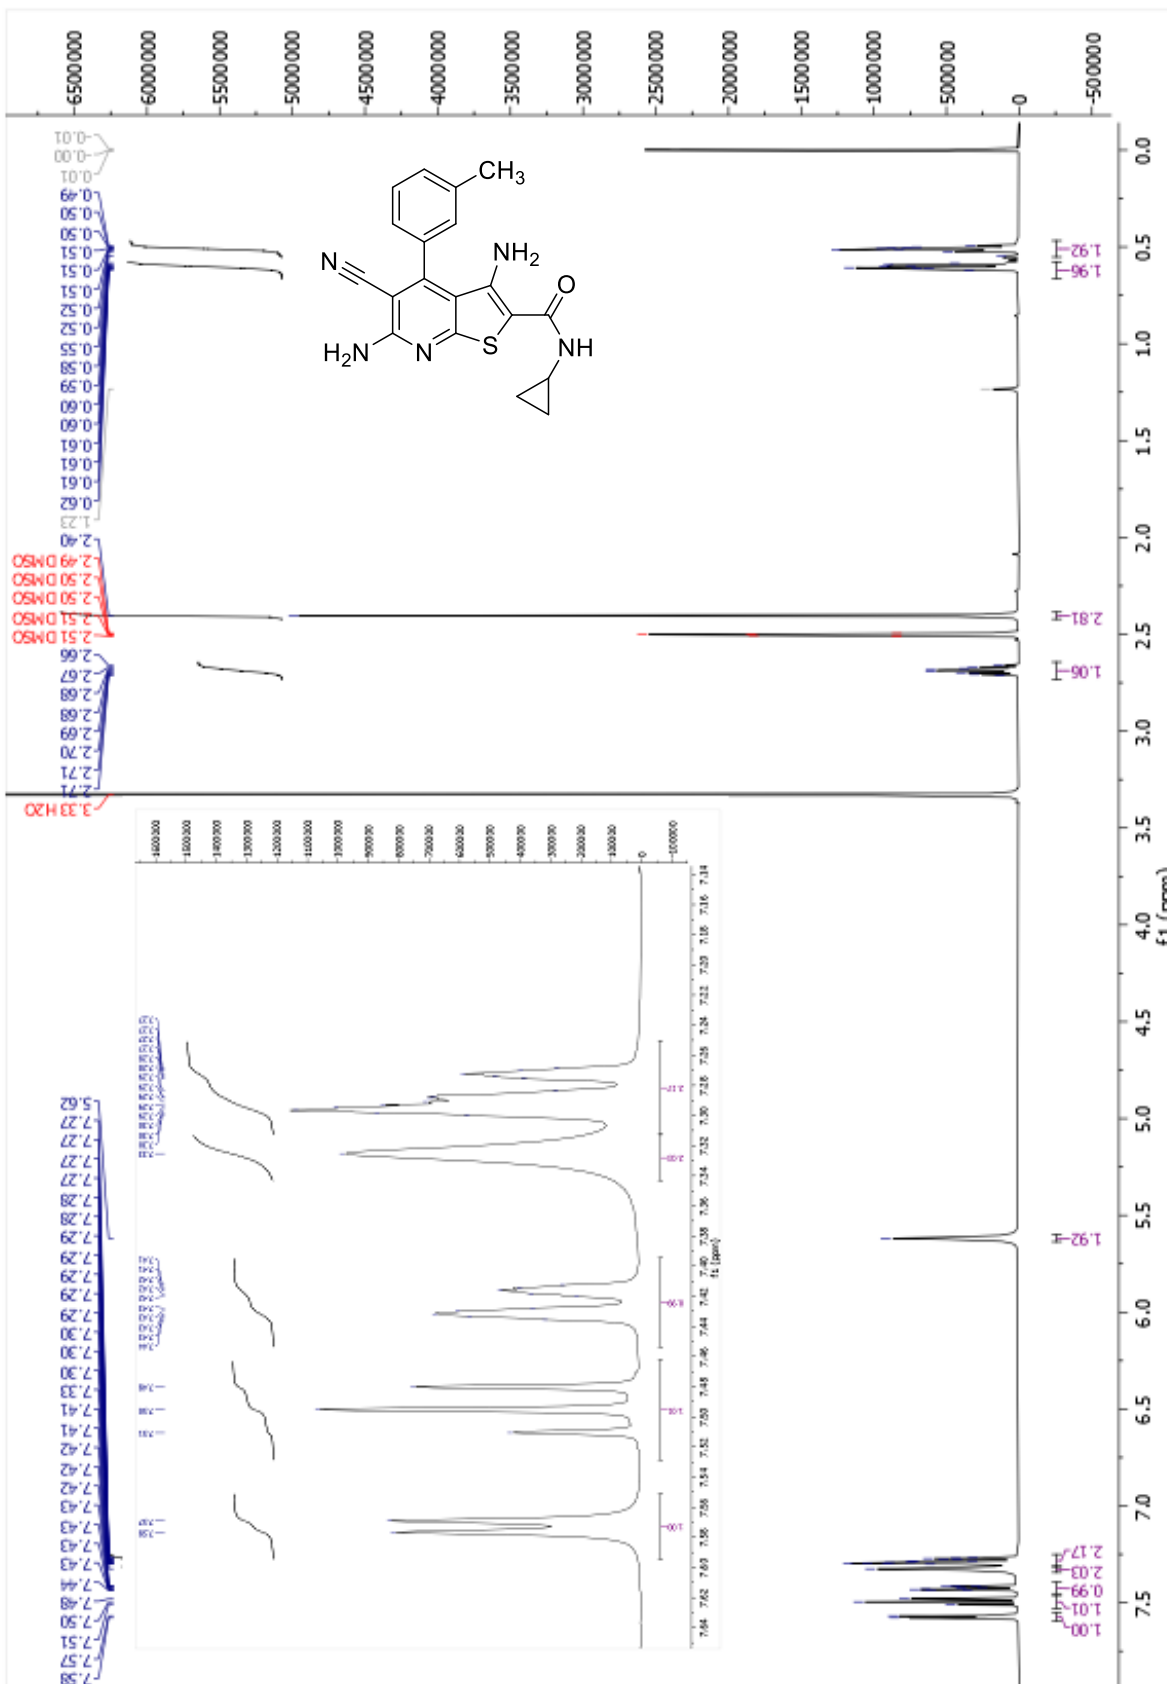

Figure S15:  $^{13}\text{C}$ -NMR spectrum of **9m** (KuSaSch134).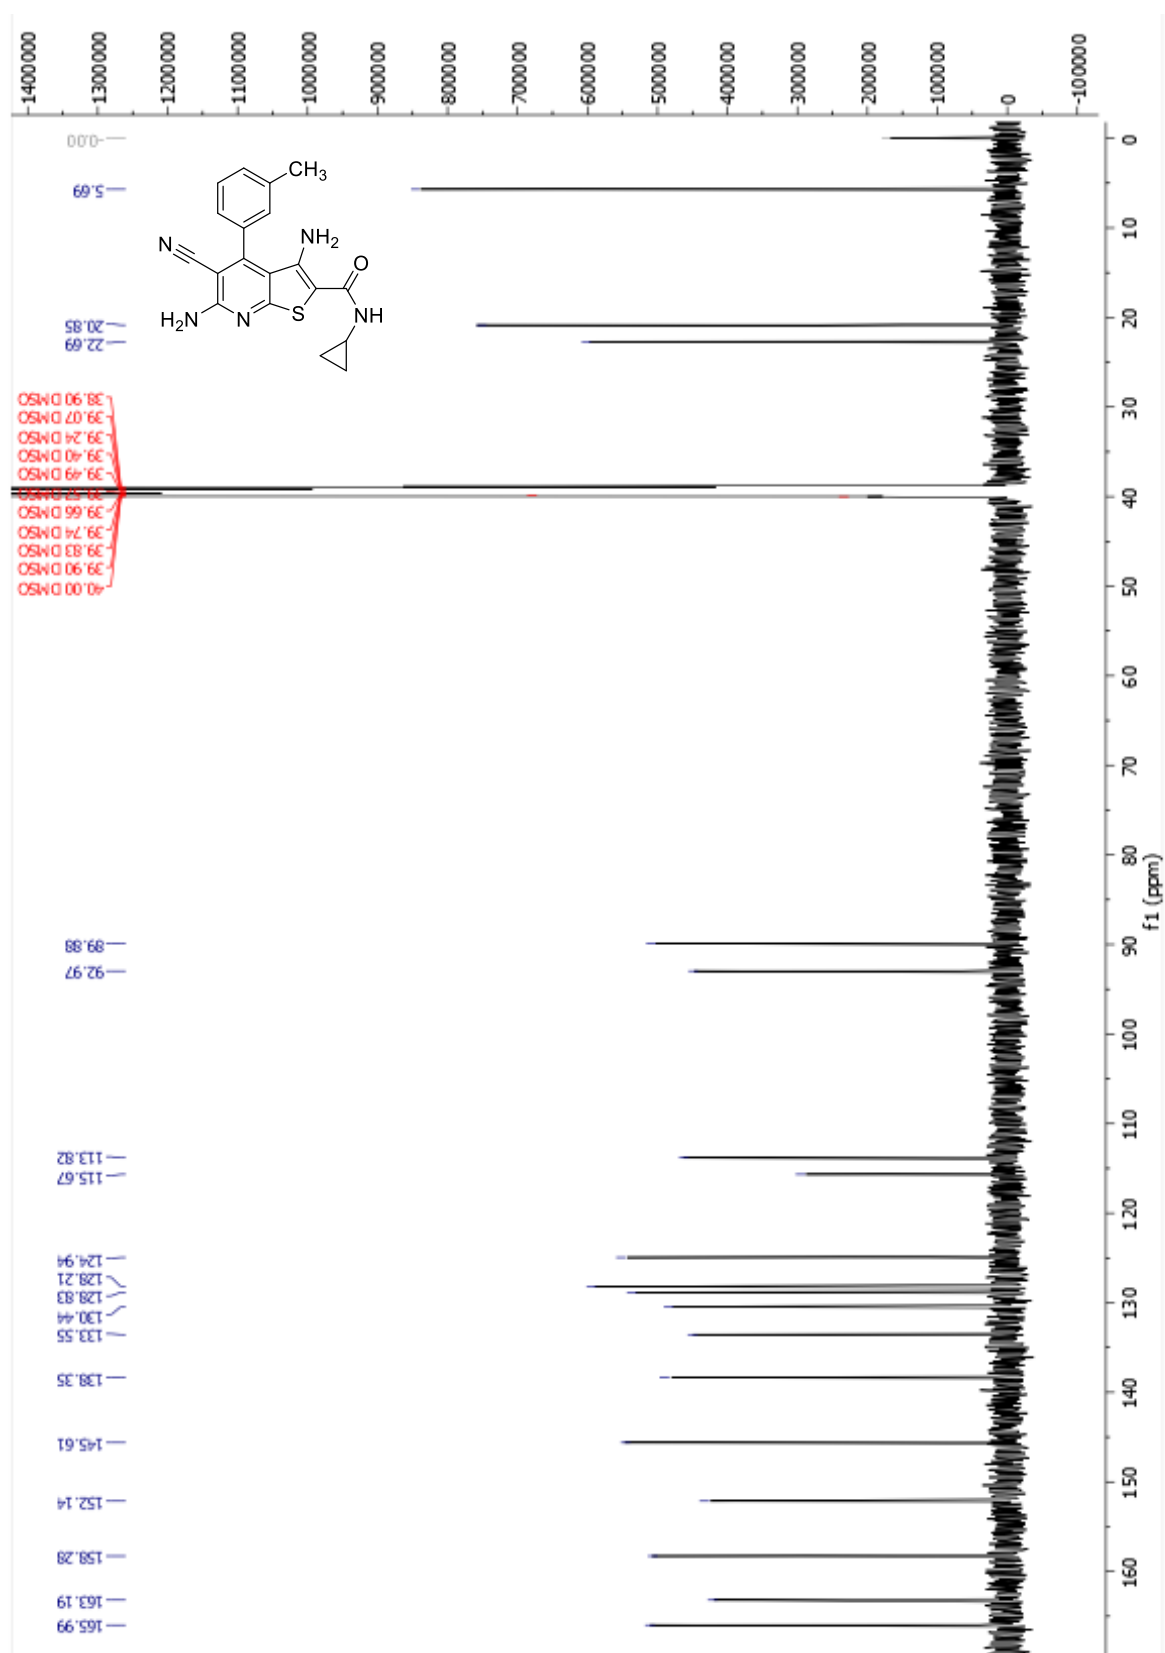

Figure S16: HSQC-NMR spectrum of **9m** (KuSaSch134). The black circle confirms two protons under one carbon signal.

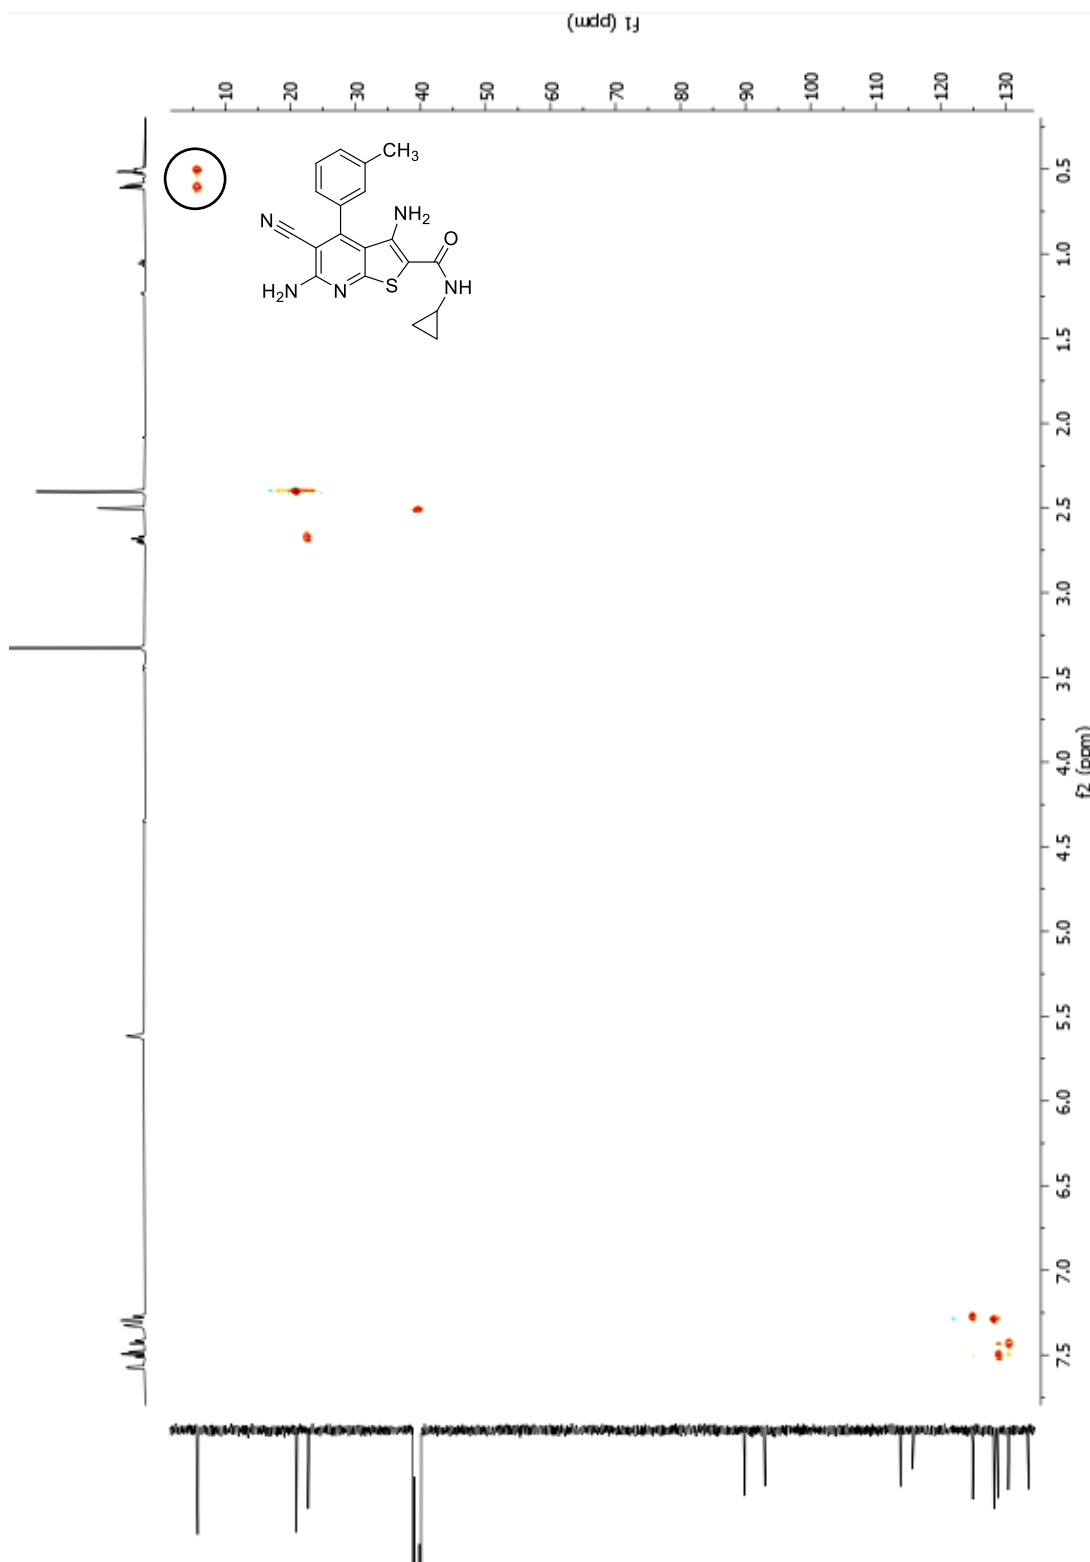



Figure S17: IR spectrum of **9m** (KuSaSch134).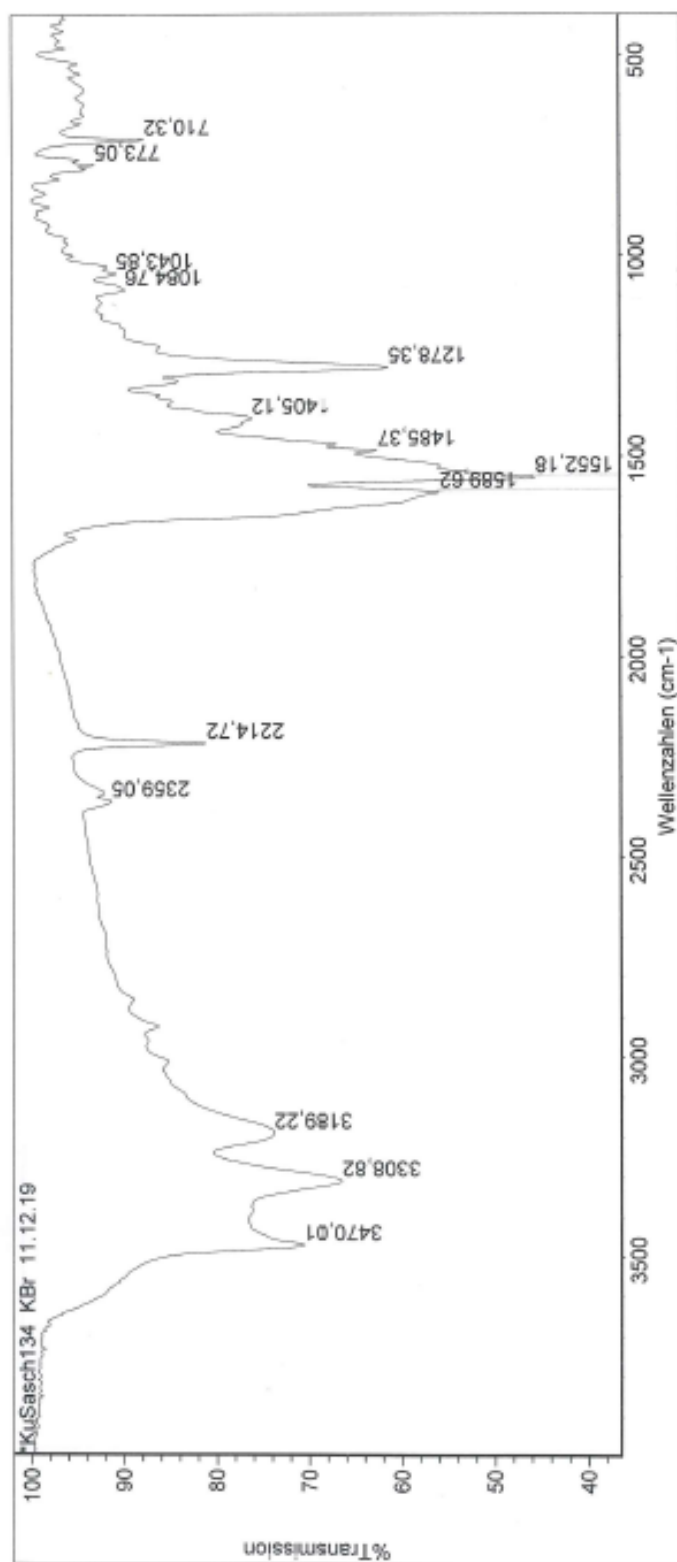

Wed Dez 11 11:23:20 2019 (GMT+01:00)

SUCHE BANDEN:

Spektrum: \*KuSaSch134 KBr 11.12.19

Bereich: 3999,64 400,00

Absoluter Schwellwert: 93,920

Sensitivität: 50

Bandentabelle:

|           |         |             |        |
|-----------|---------|-------------|--------|
| Position: | 1552,18 | Intensität: | 45,562 |
| Position: | 1589,62 | Intensität: | 55,857 |
| Position: | 1278,35 | Intensität: | 61,297 |
| Position: | 1485,37 | Intensität: | 62,488 |
| Position: | 3308,82 | Intensität: | 66,459 |
| Position: | 3470,01 | Intensität: | 70,606 |
| Position: | 3189,22 | Intensität: | 73,792 |

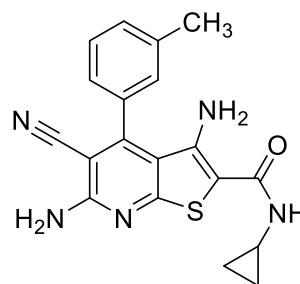

Figure S18: APCI-MS spectrum of **9m** (KuSaSch134).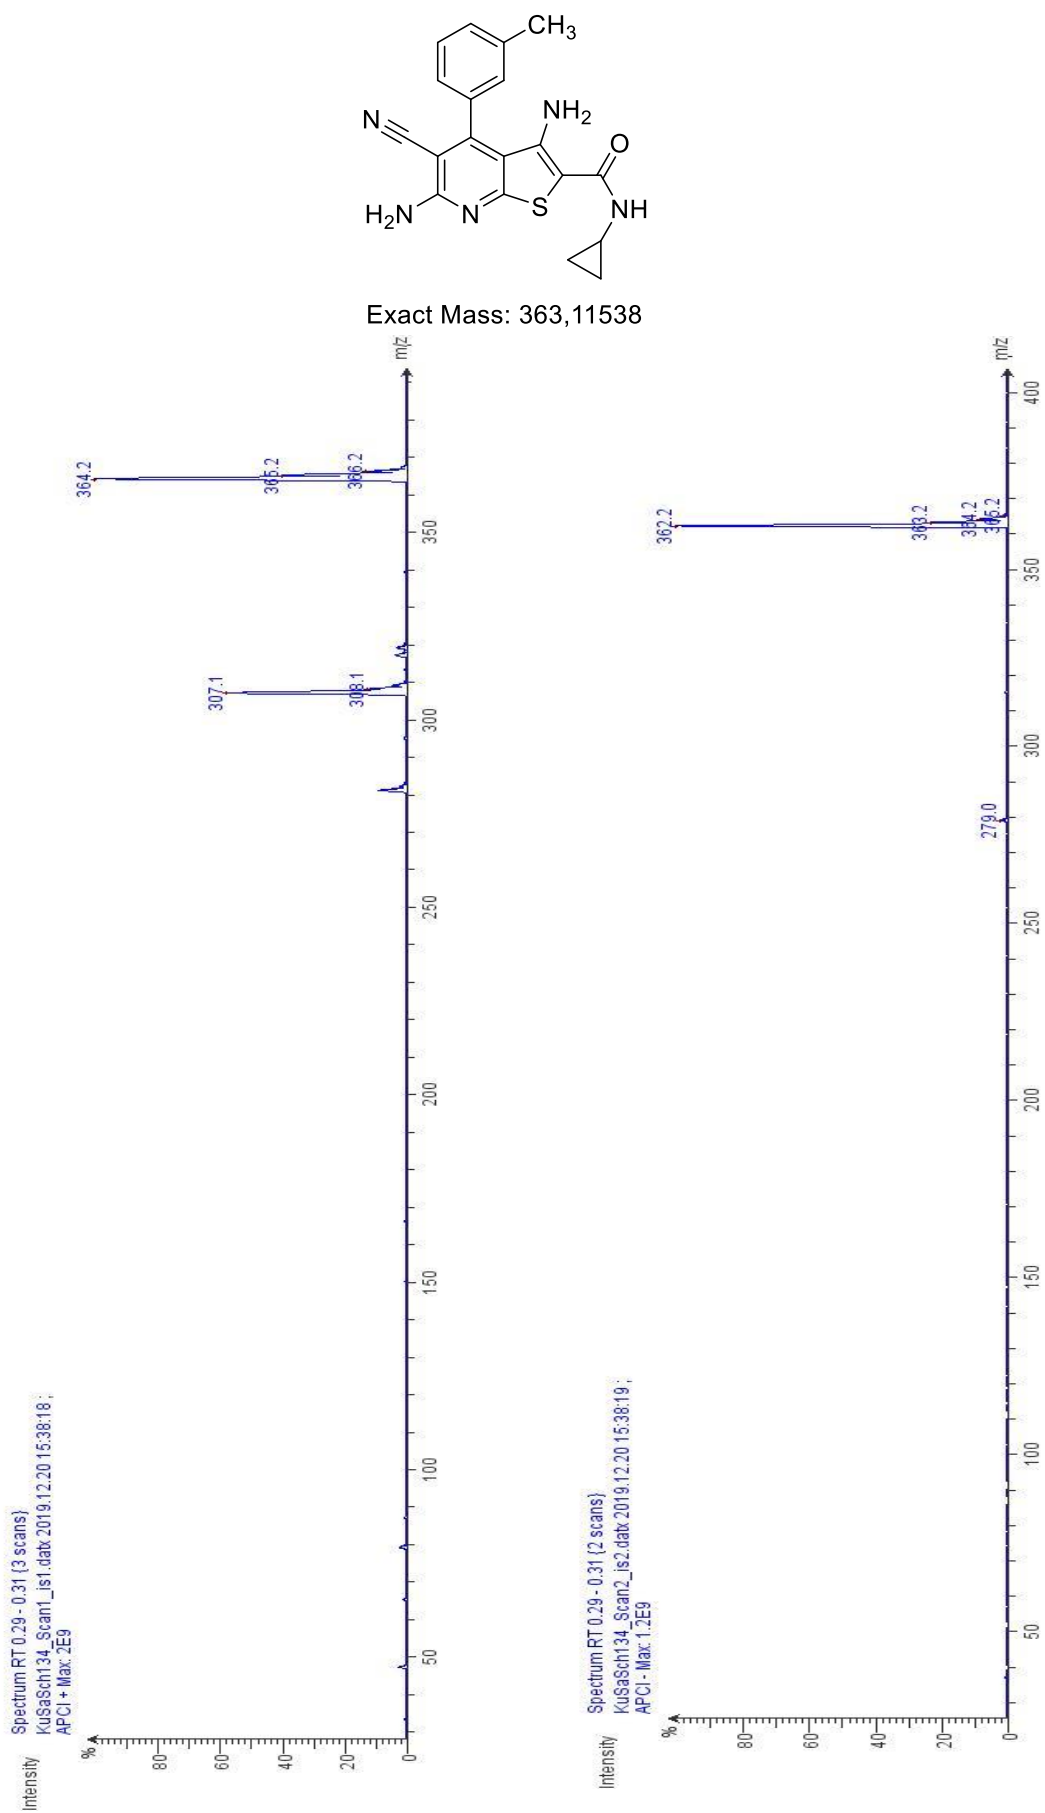

Figure S19: <sup>1</sup>H-NMR spectrum of **9n** (KuSaSch135).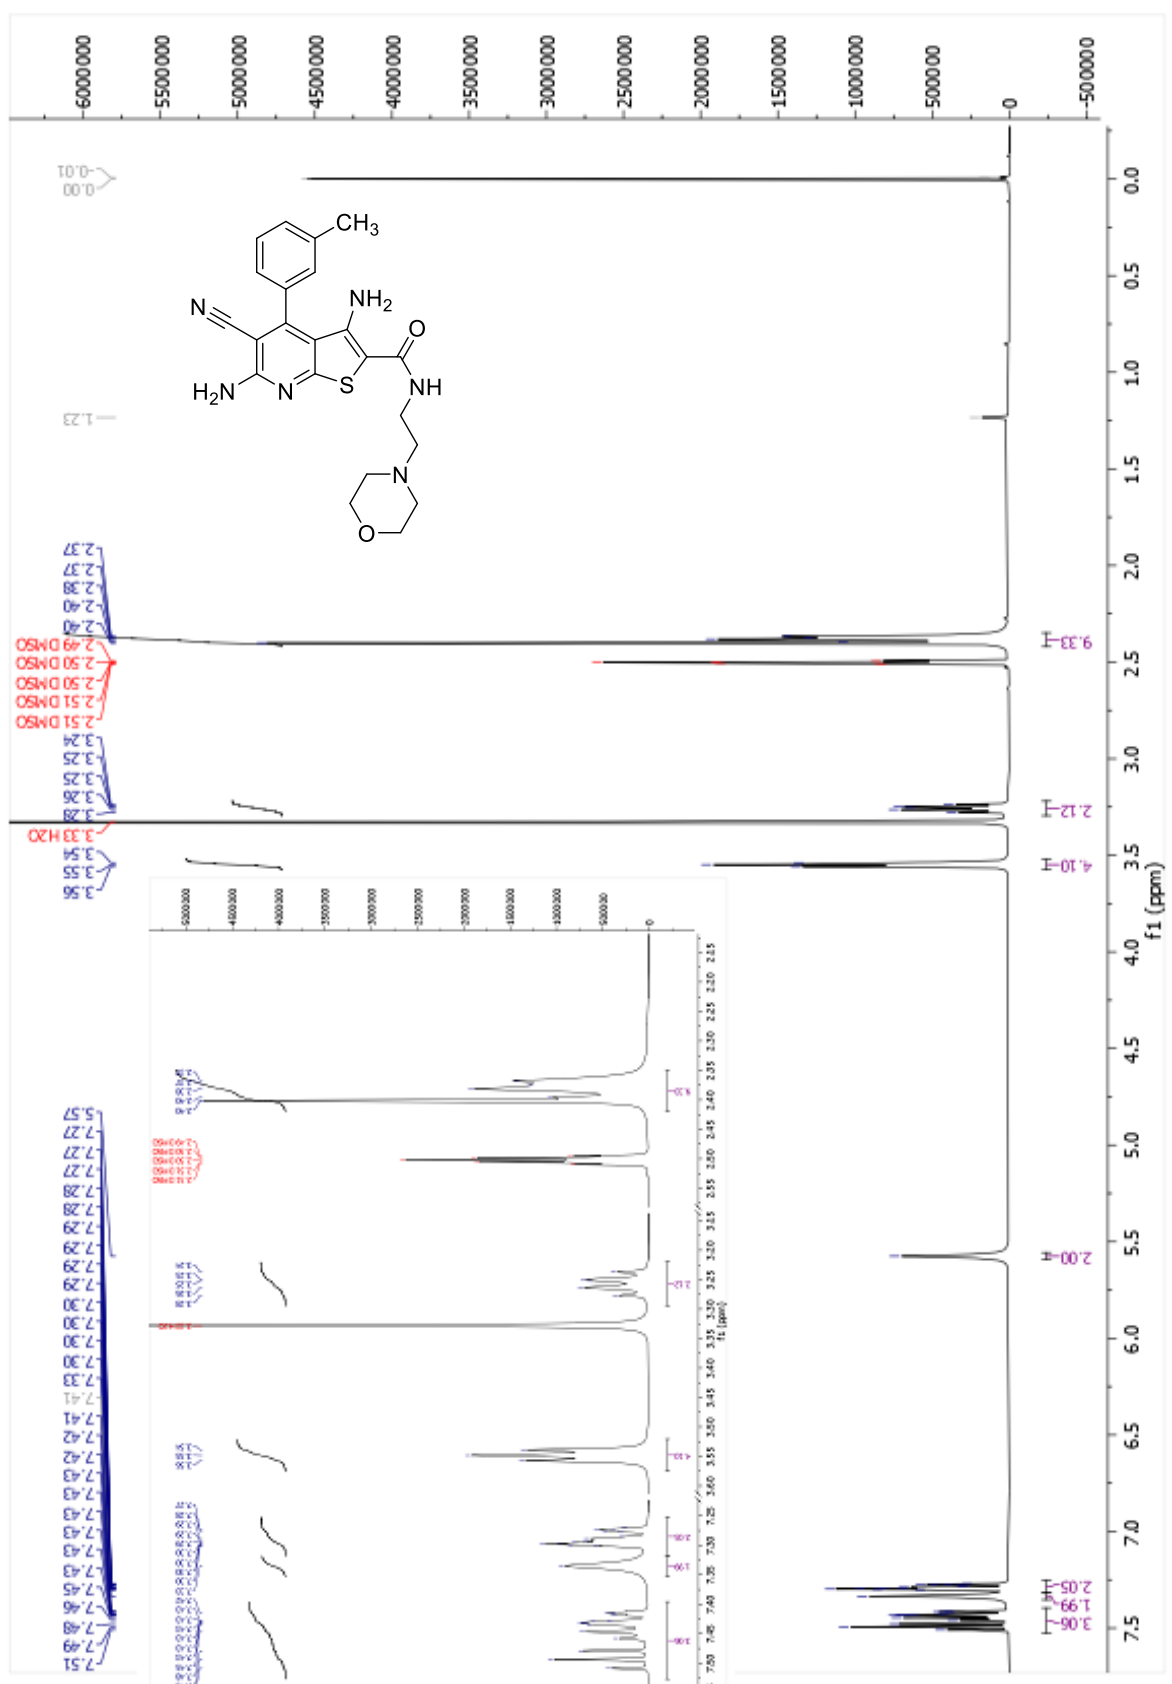

Figure S20:  $^{13}\text{C}$ -NMR spectrum of **9n** (KuSaSch135).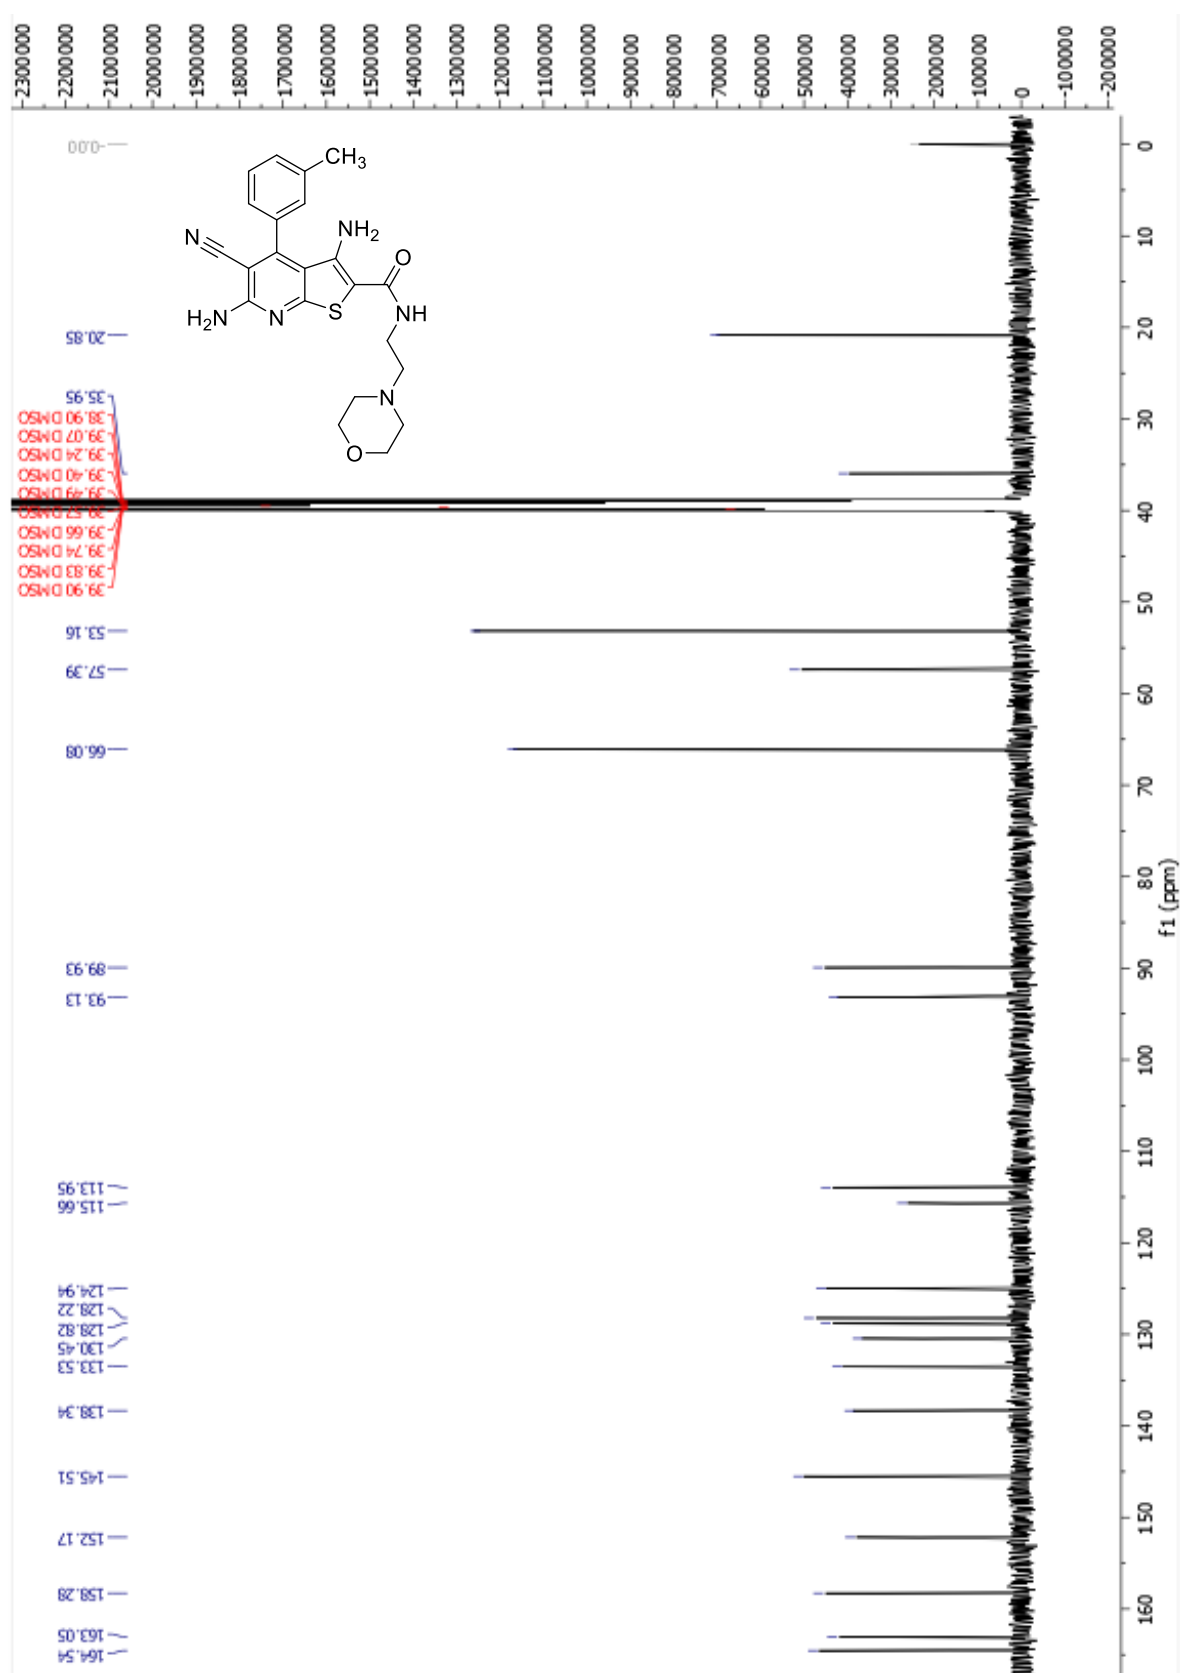

Figure S21: IR spectrum of **9n** (KuSaSch135).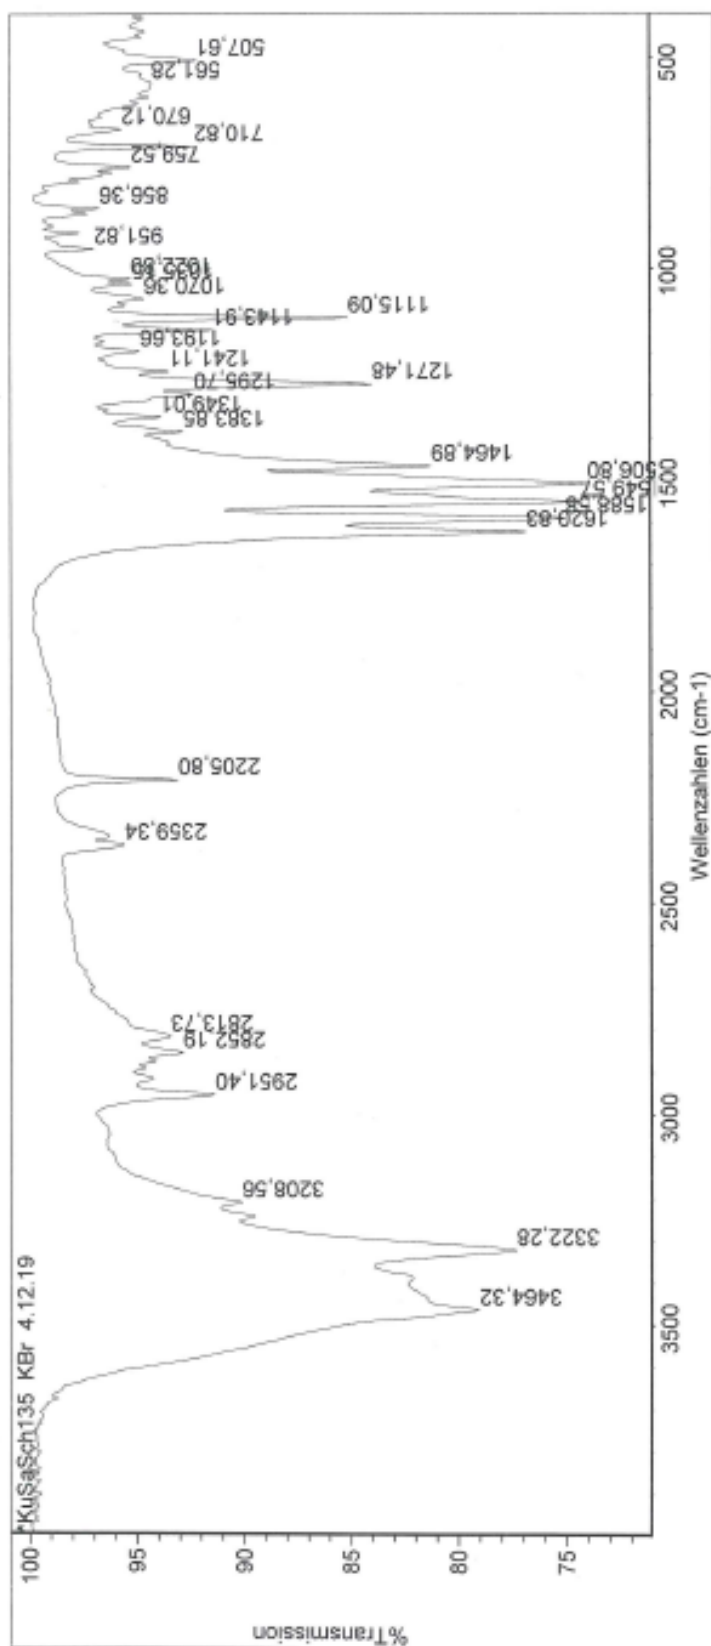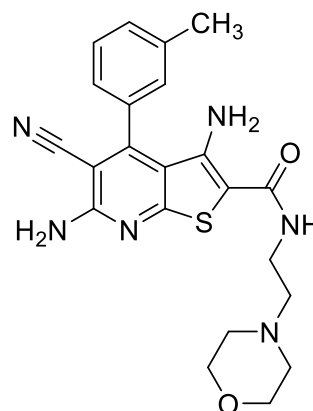

Wed Dez 04 09:19:29 2019 (GMT+01:00)

SUCHE BANDEN:

Spektrum: \*KuSaSch135 KBr 4.12.19

Bereich: 3999,64 400,00

Absoluter Schwellwert: 97,563

Sensitivität: 50

Bandentabelle:

|           |         |             |        |
|-----------|---------|-------------|--------|
| Position: | 1506,80 | Intensität: | 73,996 |
| Position: | 1549,57 | Intensität: | 74,303 |
| Position: | 1588,58 | Intensität: | 75,008 |
| Position: | 1620,83 | Intensität: | 76,825 |
| Position: | 3322,28 | Intensität: | 77,341 |
| Position: | 3464,32 | Intensität: | 79,061 |
| Position: | 1464,89 | Intensität: | 81,240 |

Figure S22: APCI-MS spectrum of **9n** (KuSaSch135).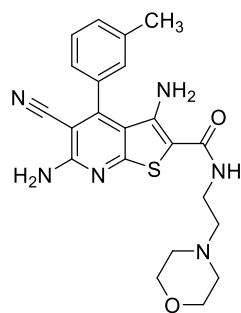

Exact Mass: 436,16814

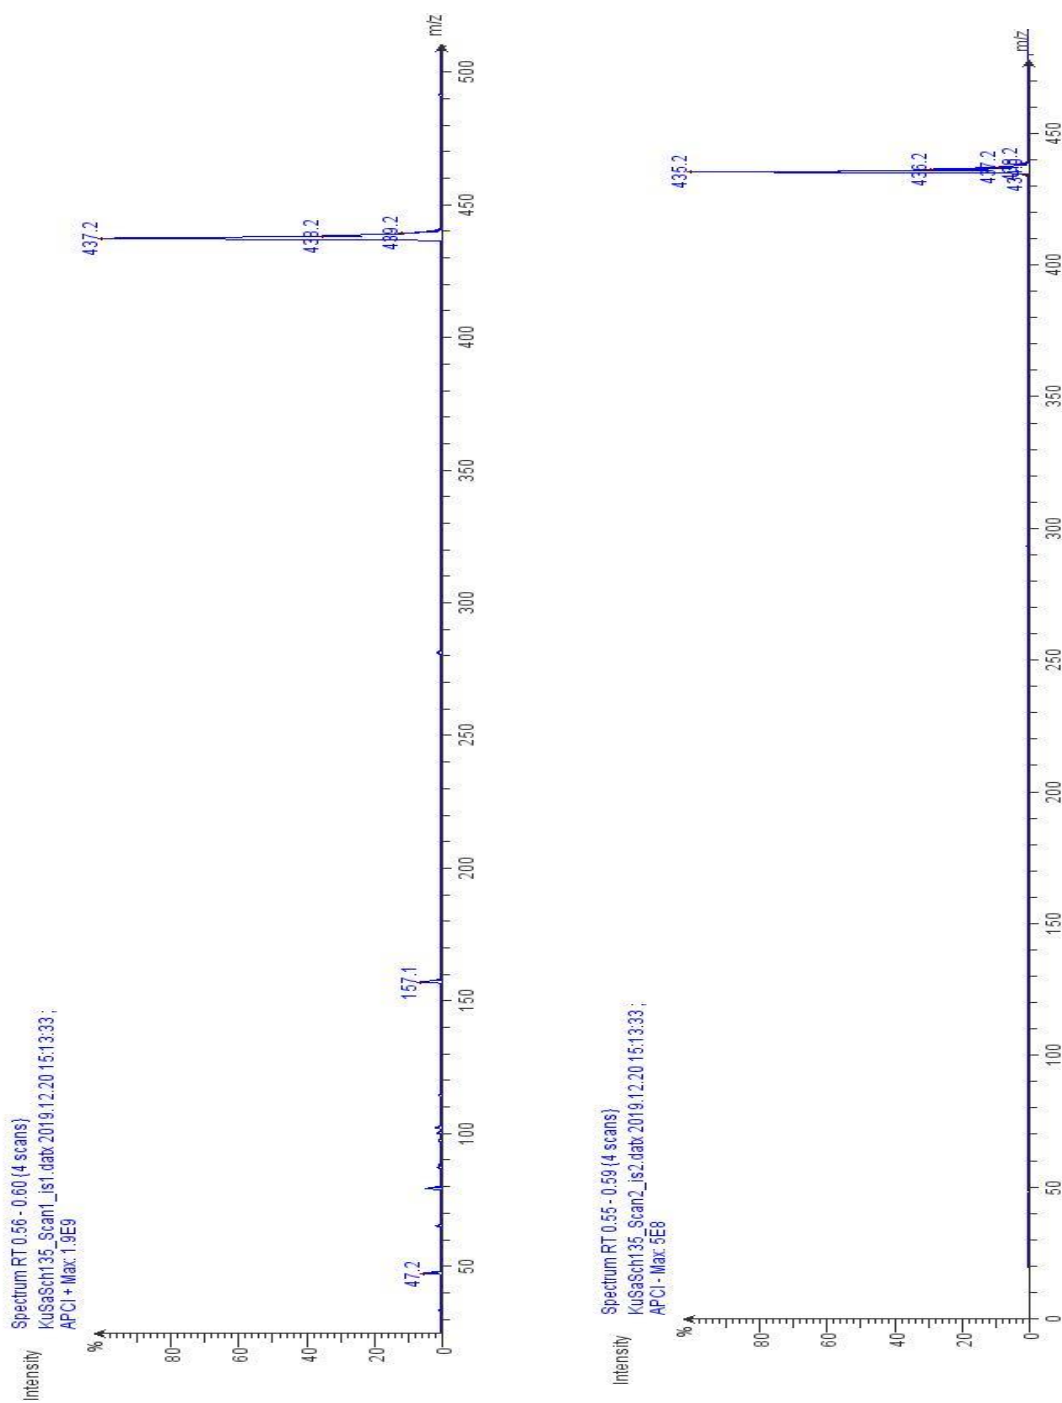

Figure S23:  $^1\text{H-NMR}$  spectrum of **9y** (KuSaSch060).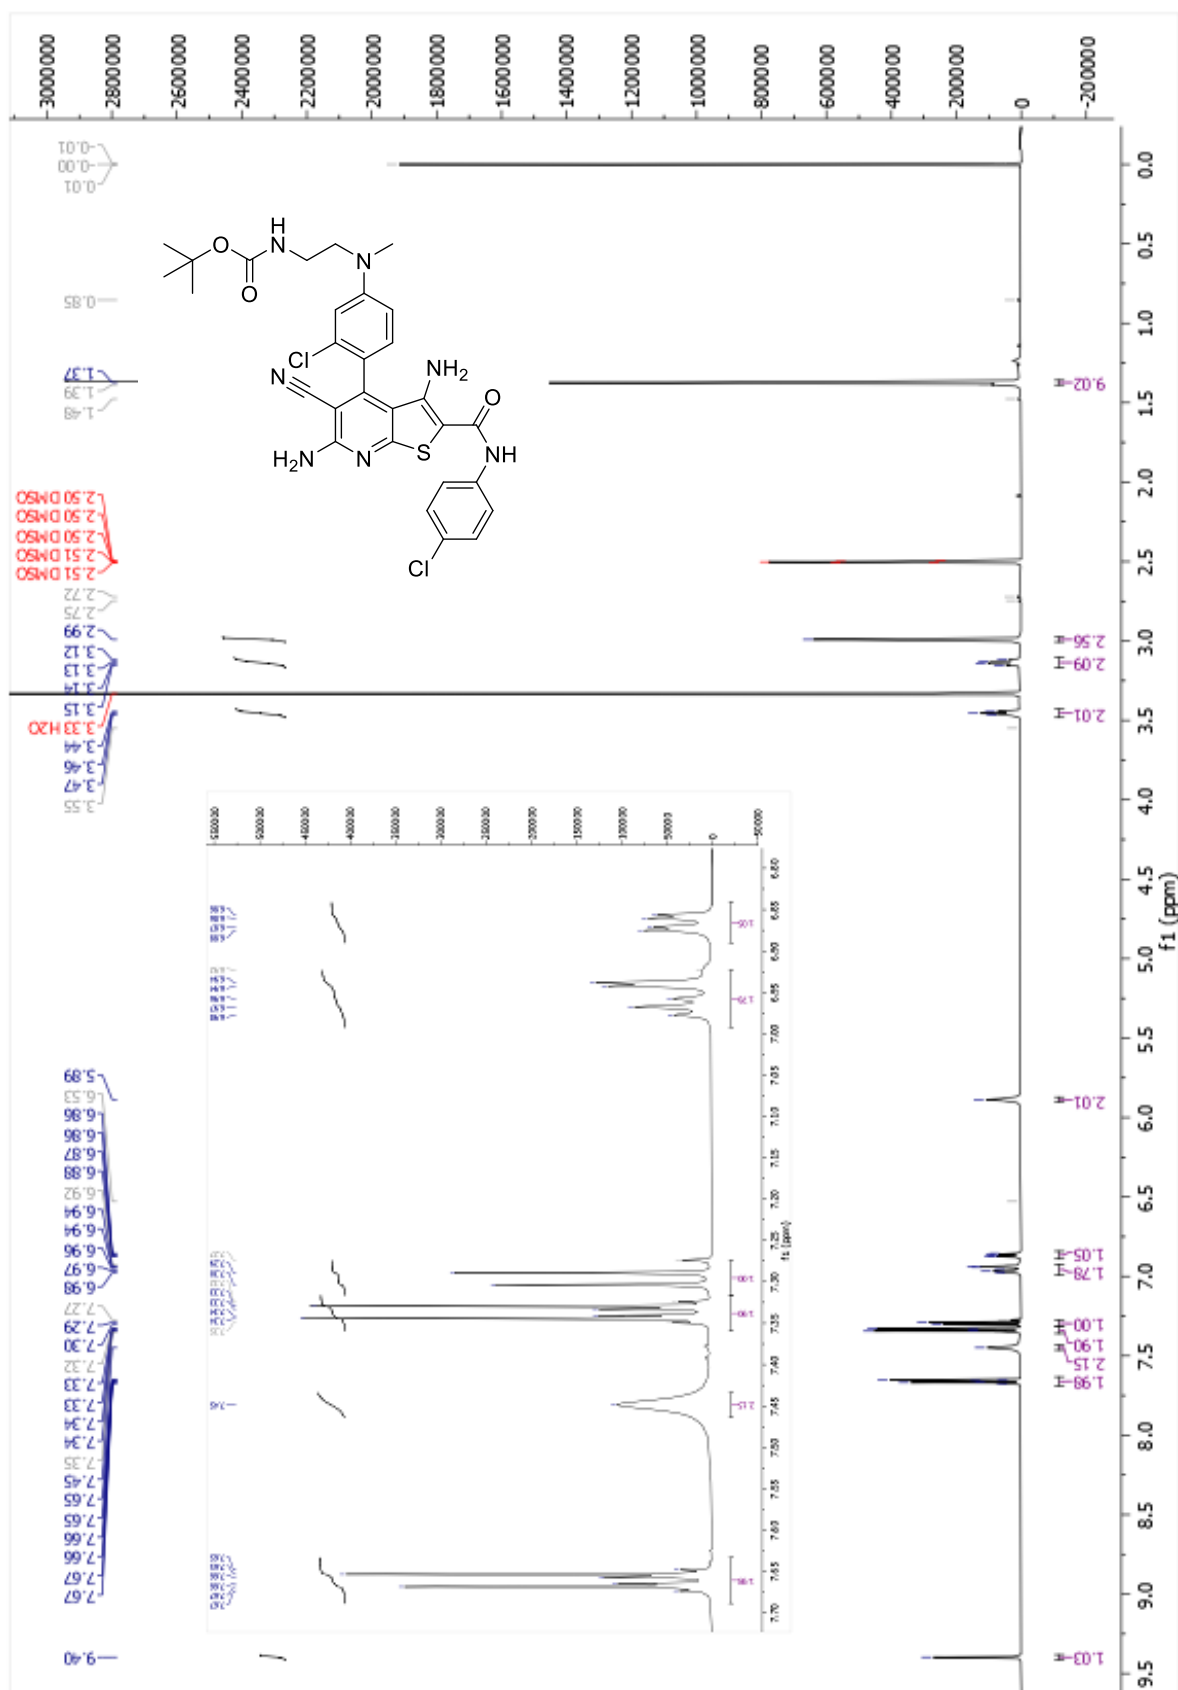

Figure S24:  $^{13}\text{C}$ -NMR spectrum of **9y** (KuSaSch060).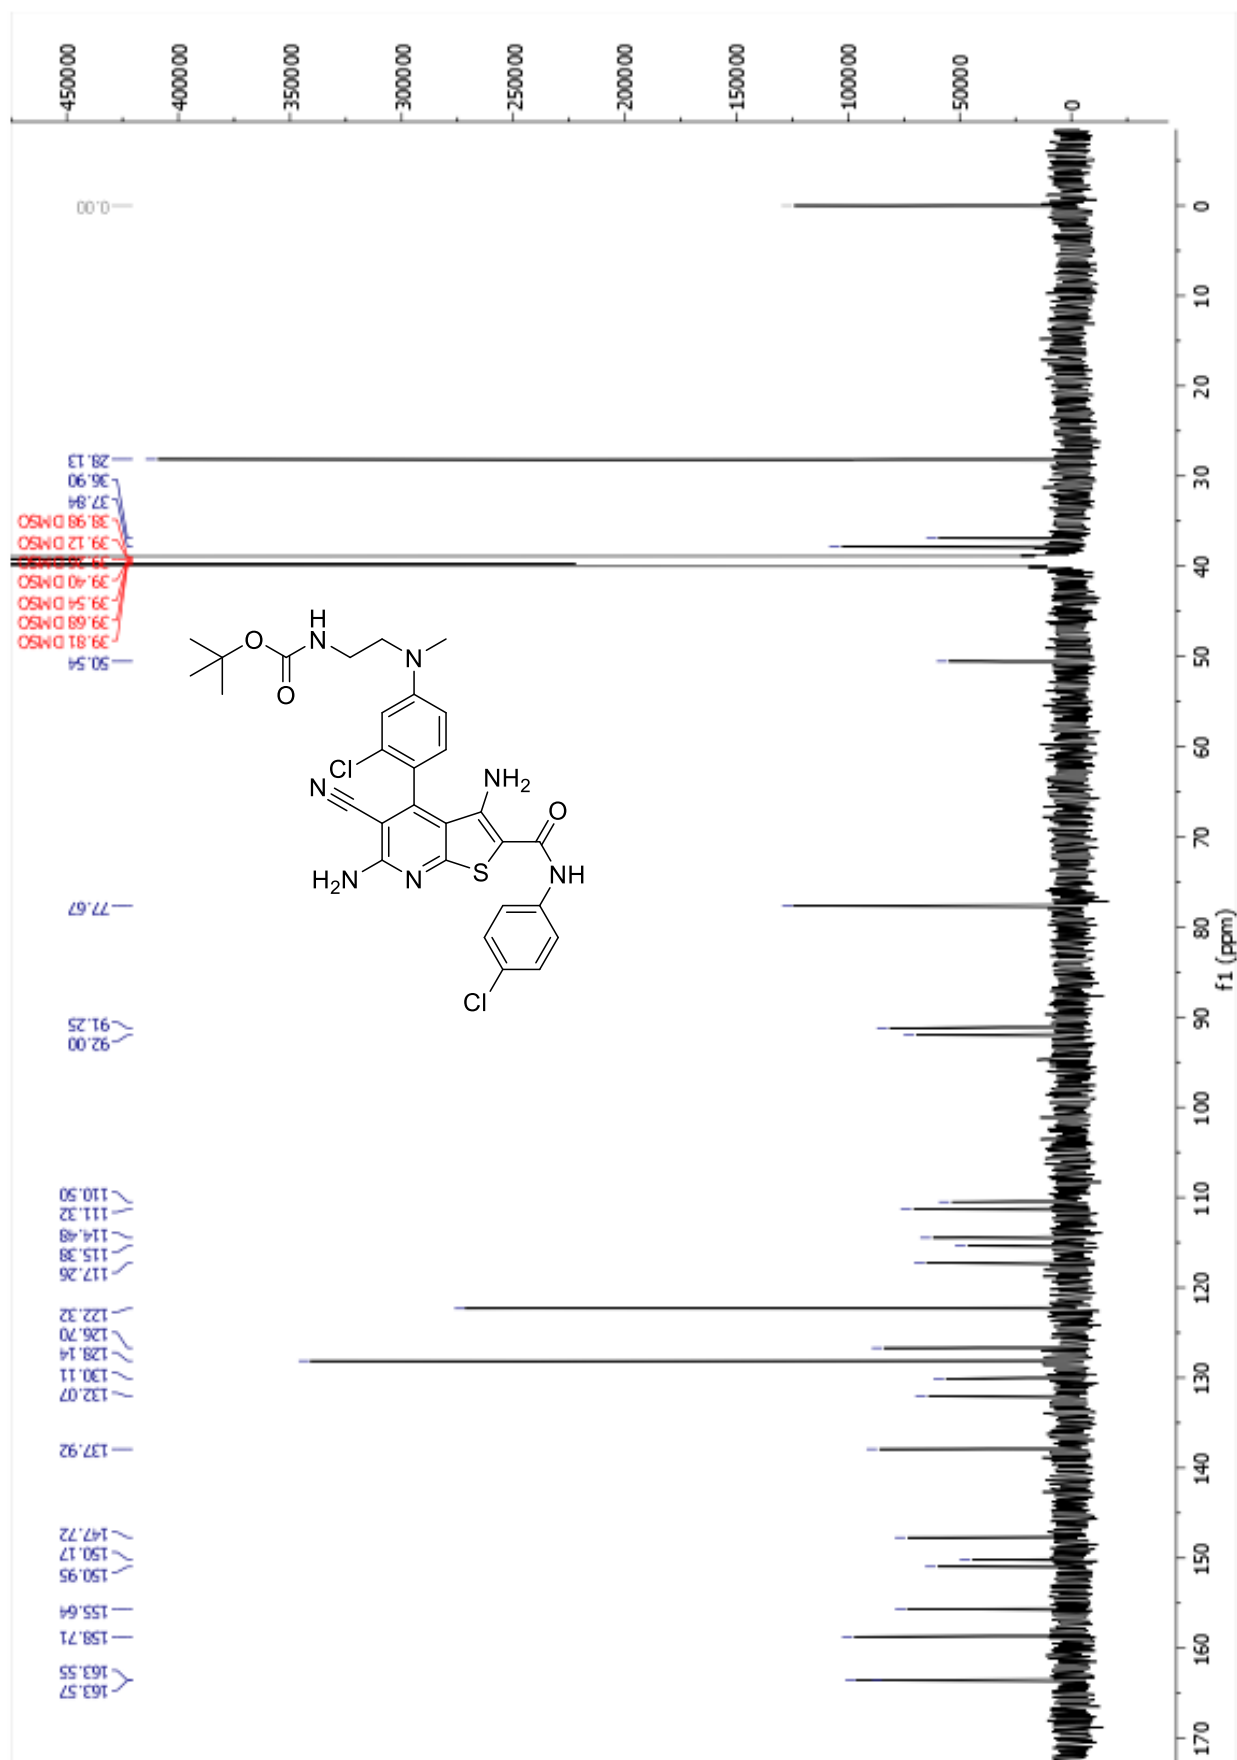



Figure S25: IR spectrum of **9y** (KuSaSch060).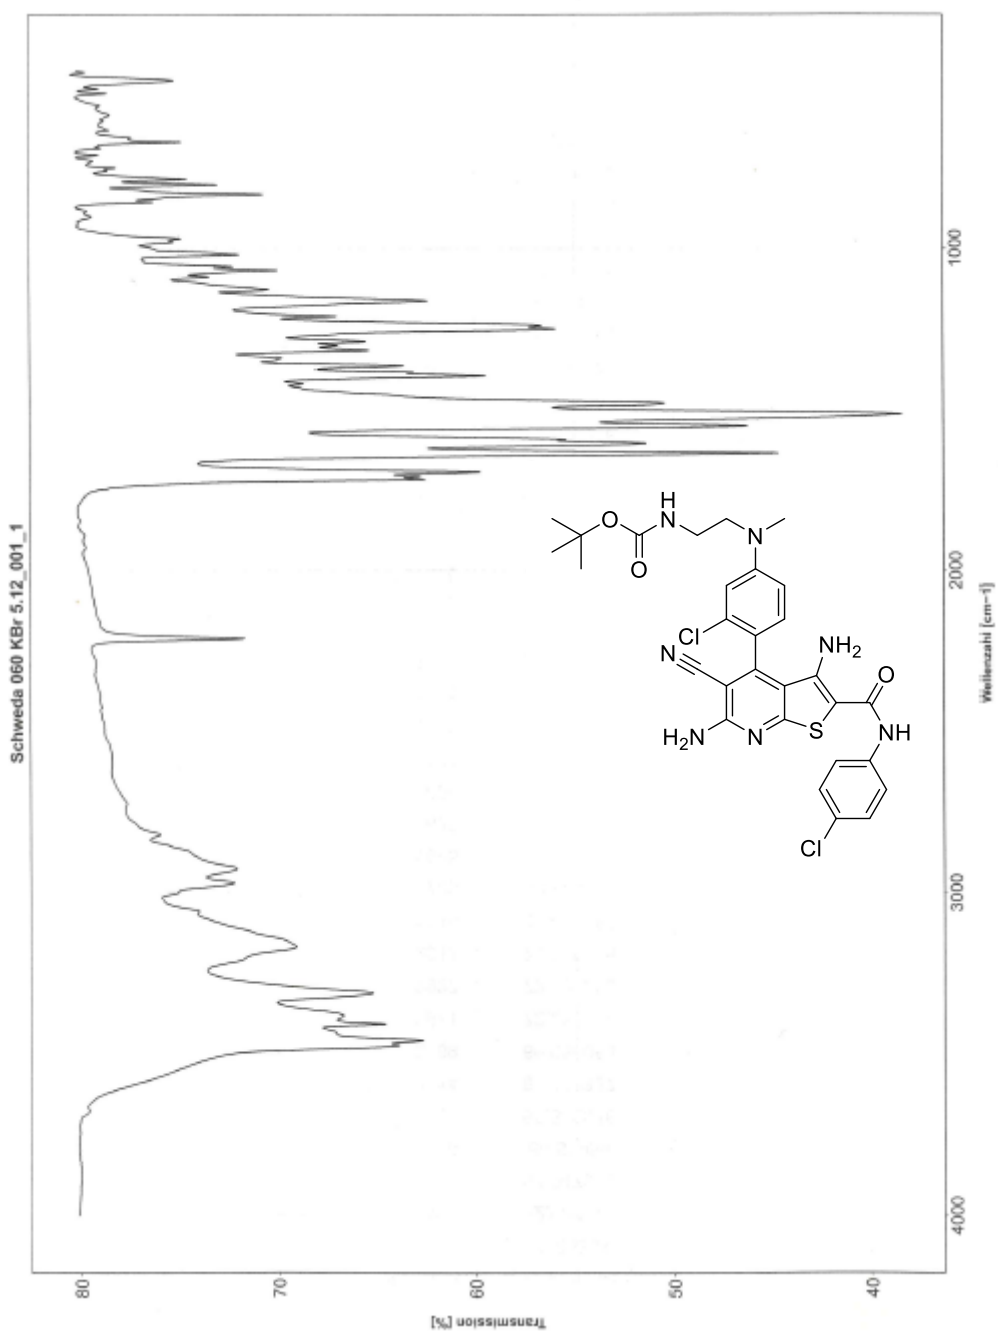

Figure S26: APCI-MS spectrum of **9y** (KuSaSch060).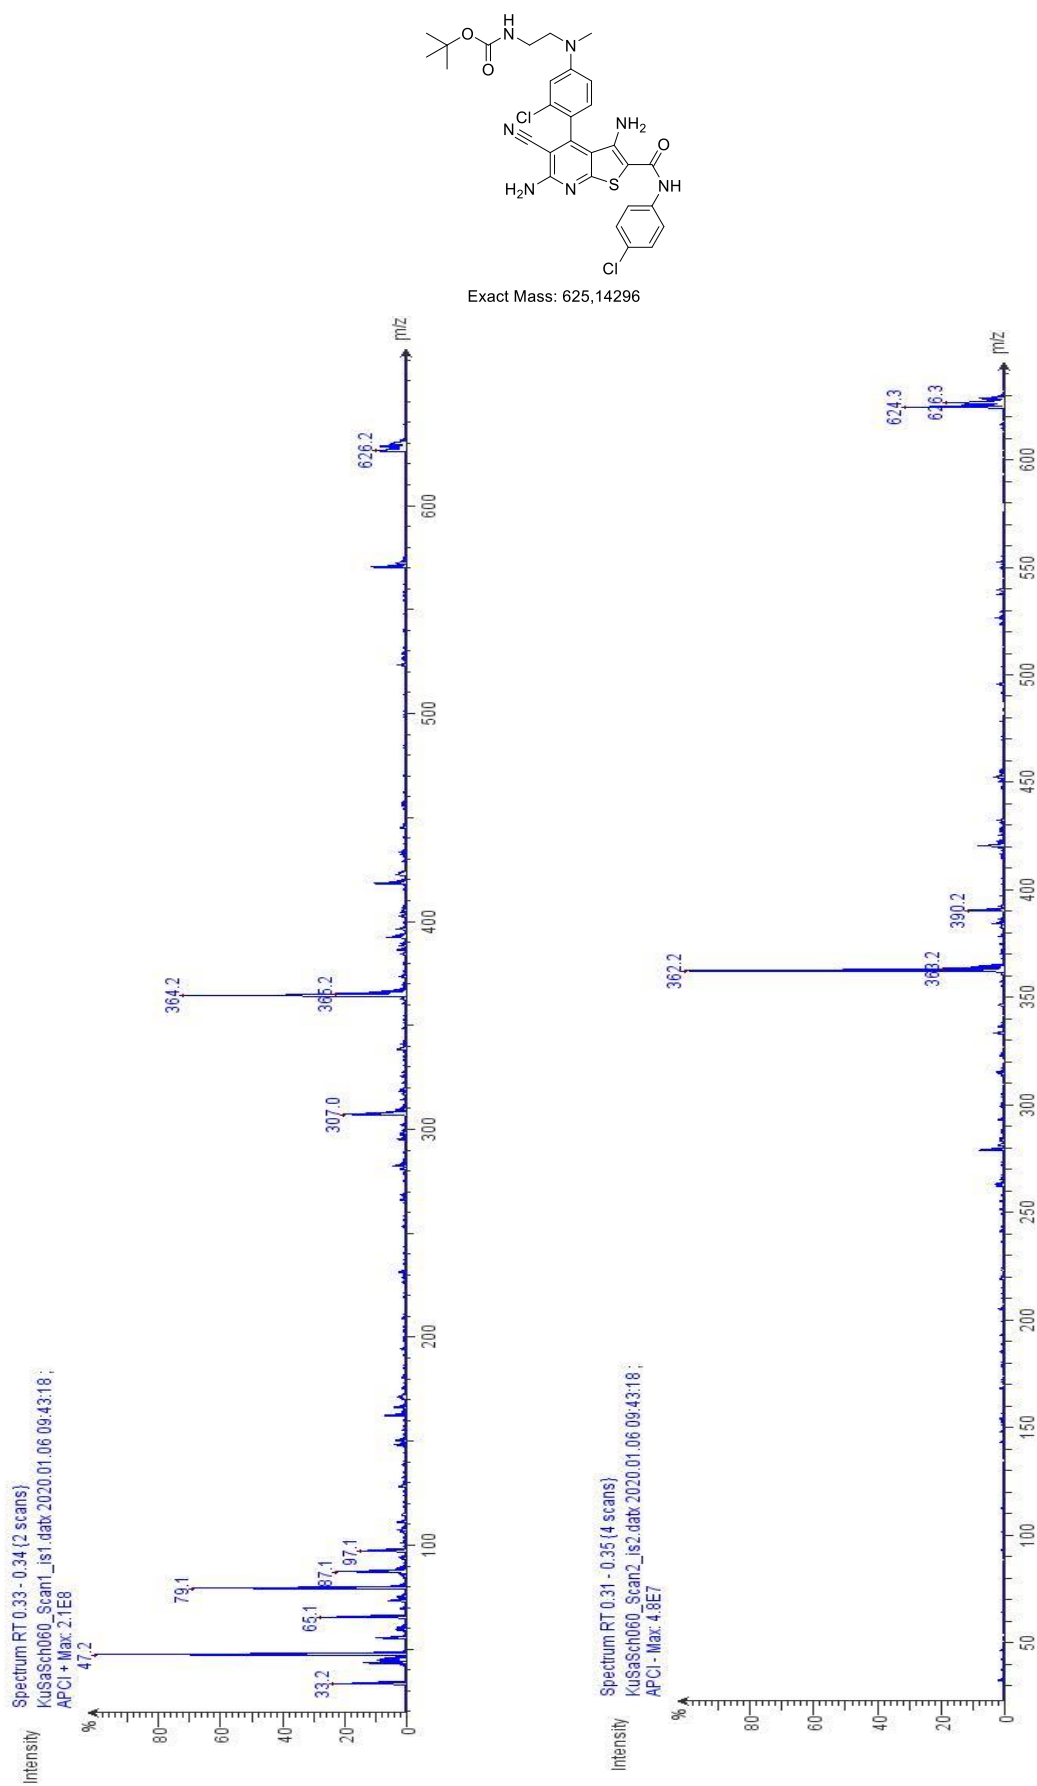

Figure S27:  $^1\text{H-NMR}$  spectrum of **9z** (KuSaSch063).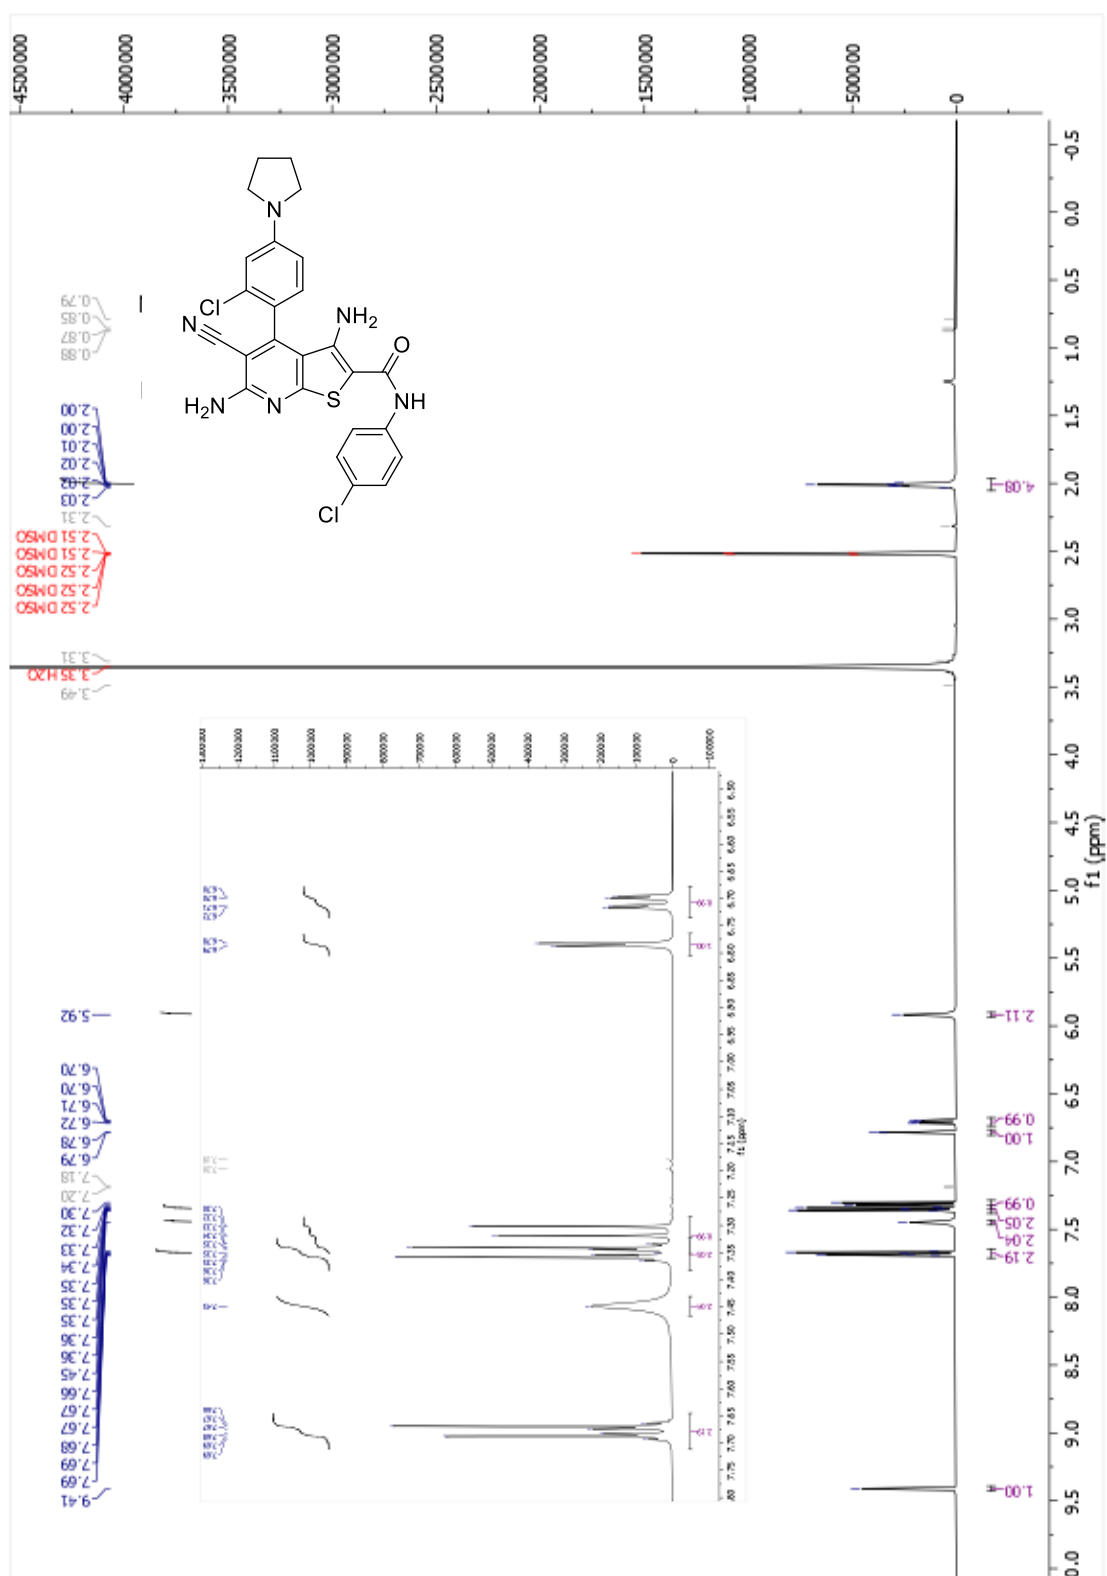

Figure S28:  $^{13}\text{C}$ -NMR spectrum of **9z** (KuSaSch063).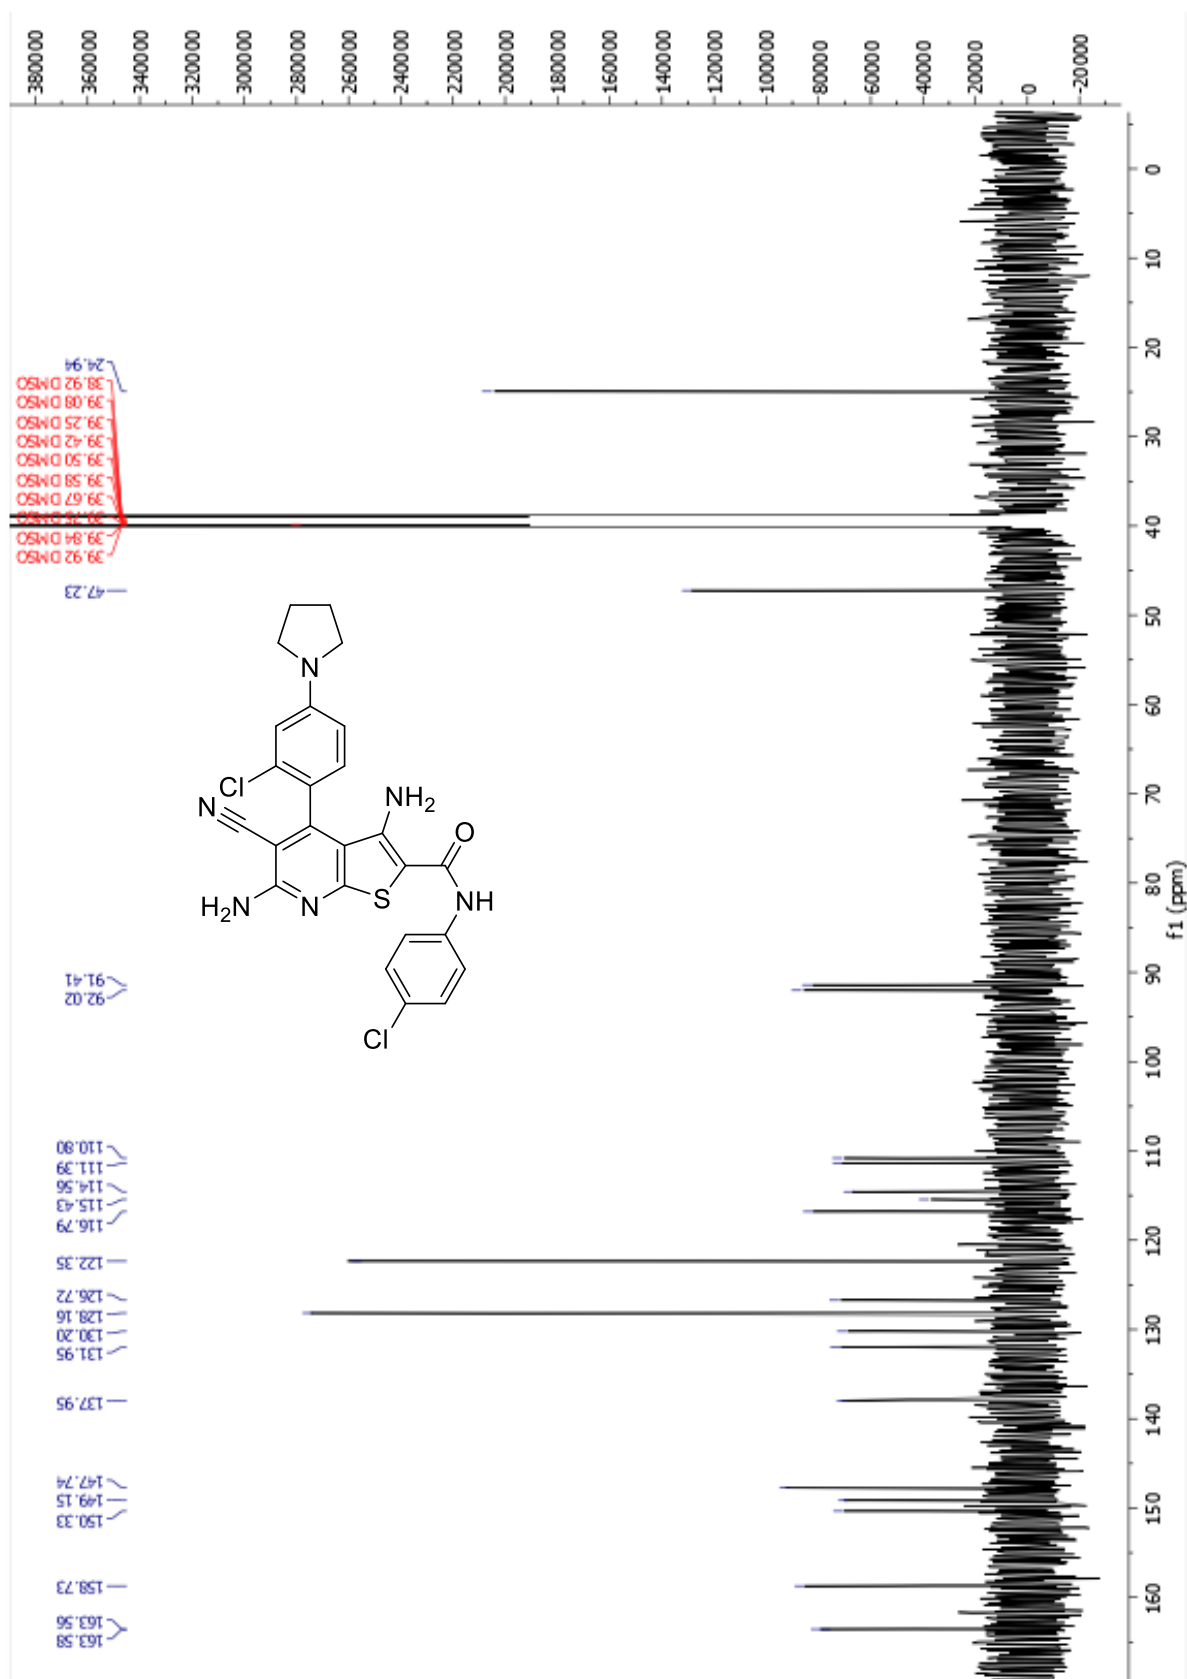

Figure S29: HSCQ-NMR spectrum of **9z** (KuSaSch063). The black circle confirms protons under the HDO signal.

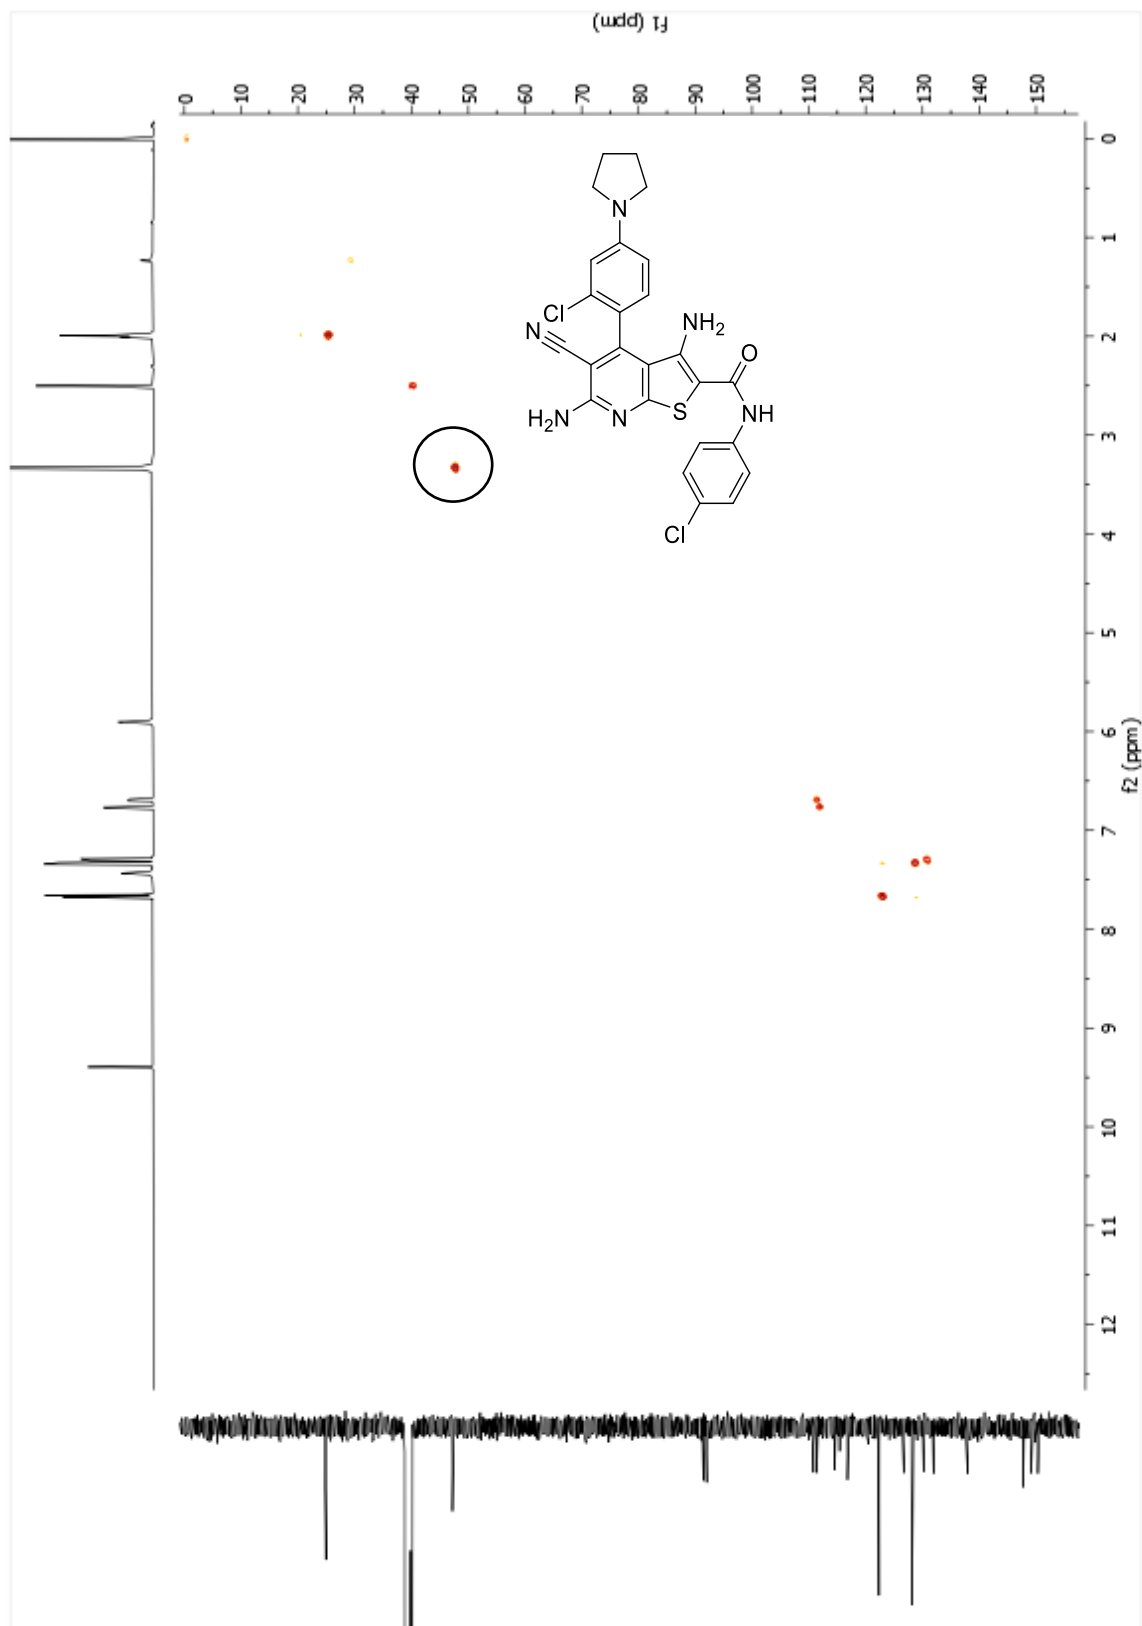

Figure S30: IR spectrum of **9z** (KuSaSch063).

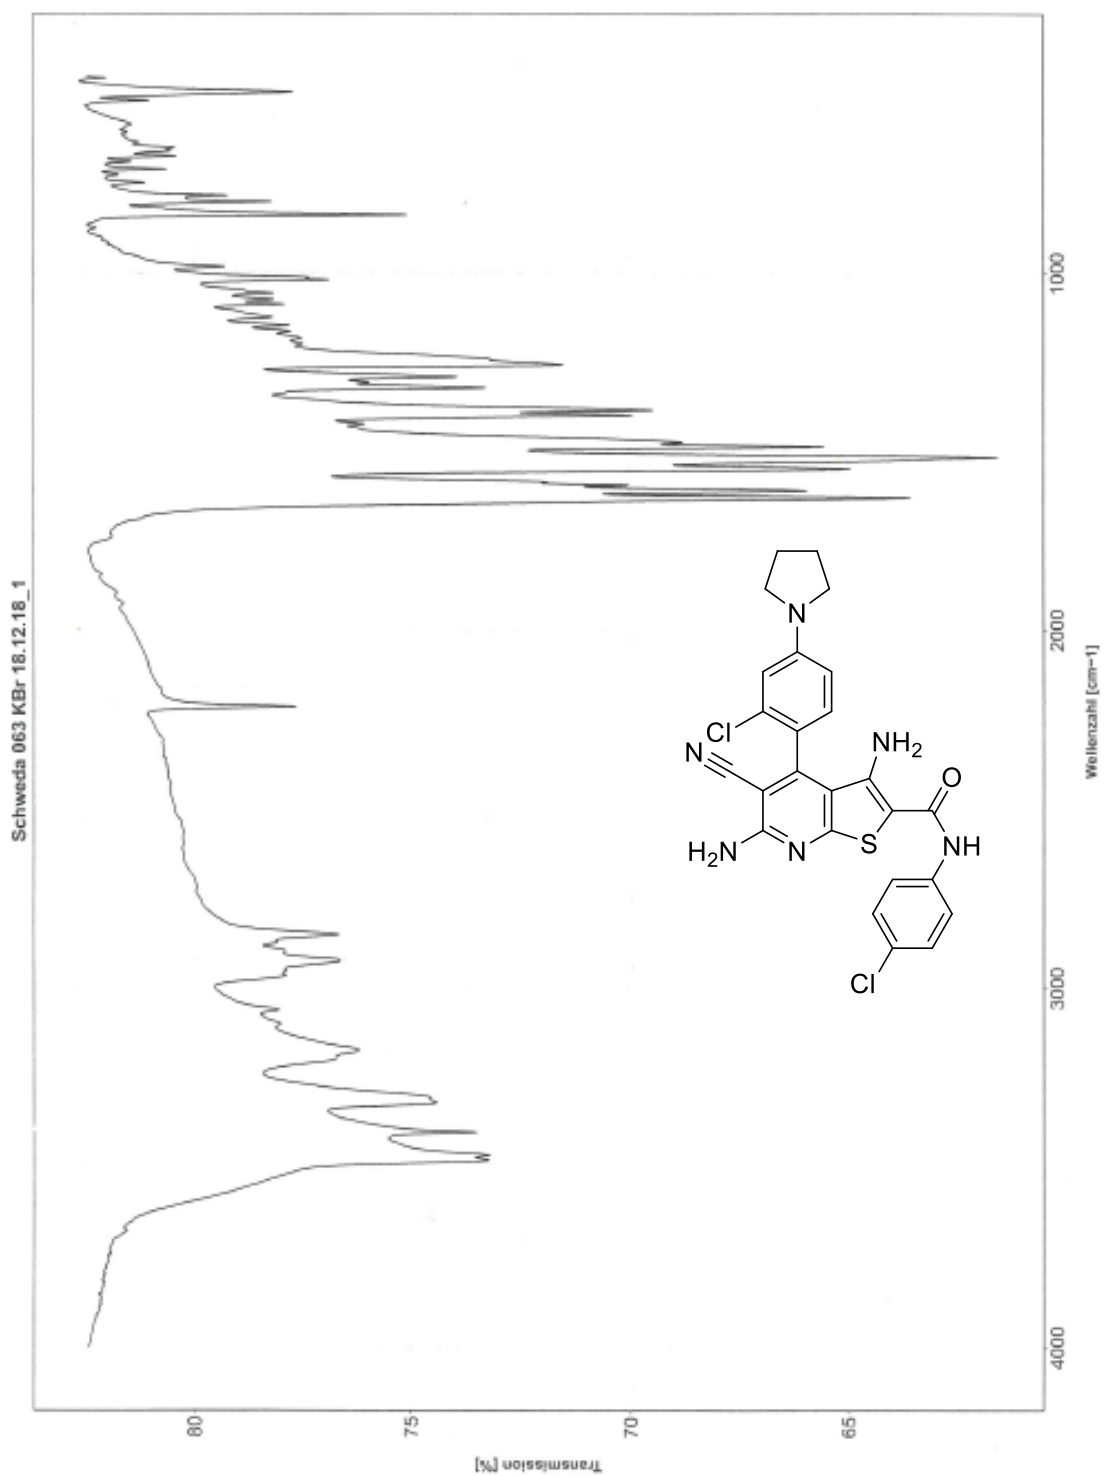

Figure S31: APCI-MS of **9z** (KuSaSch063).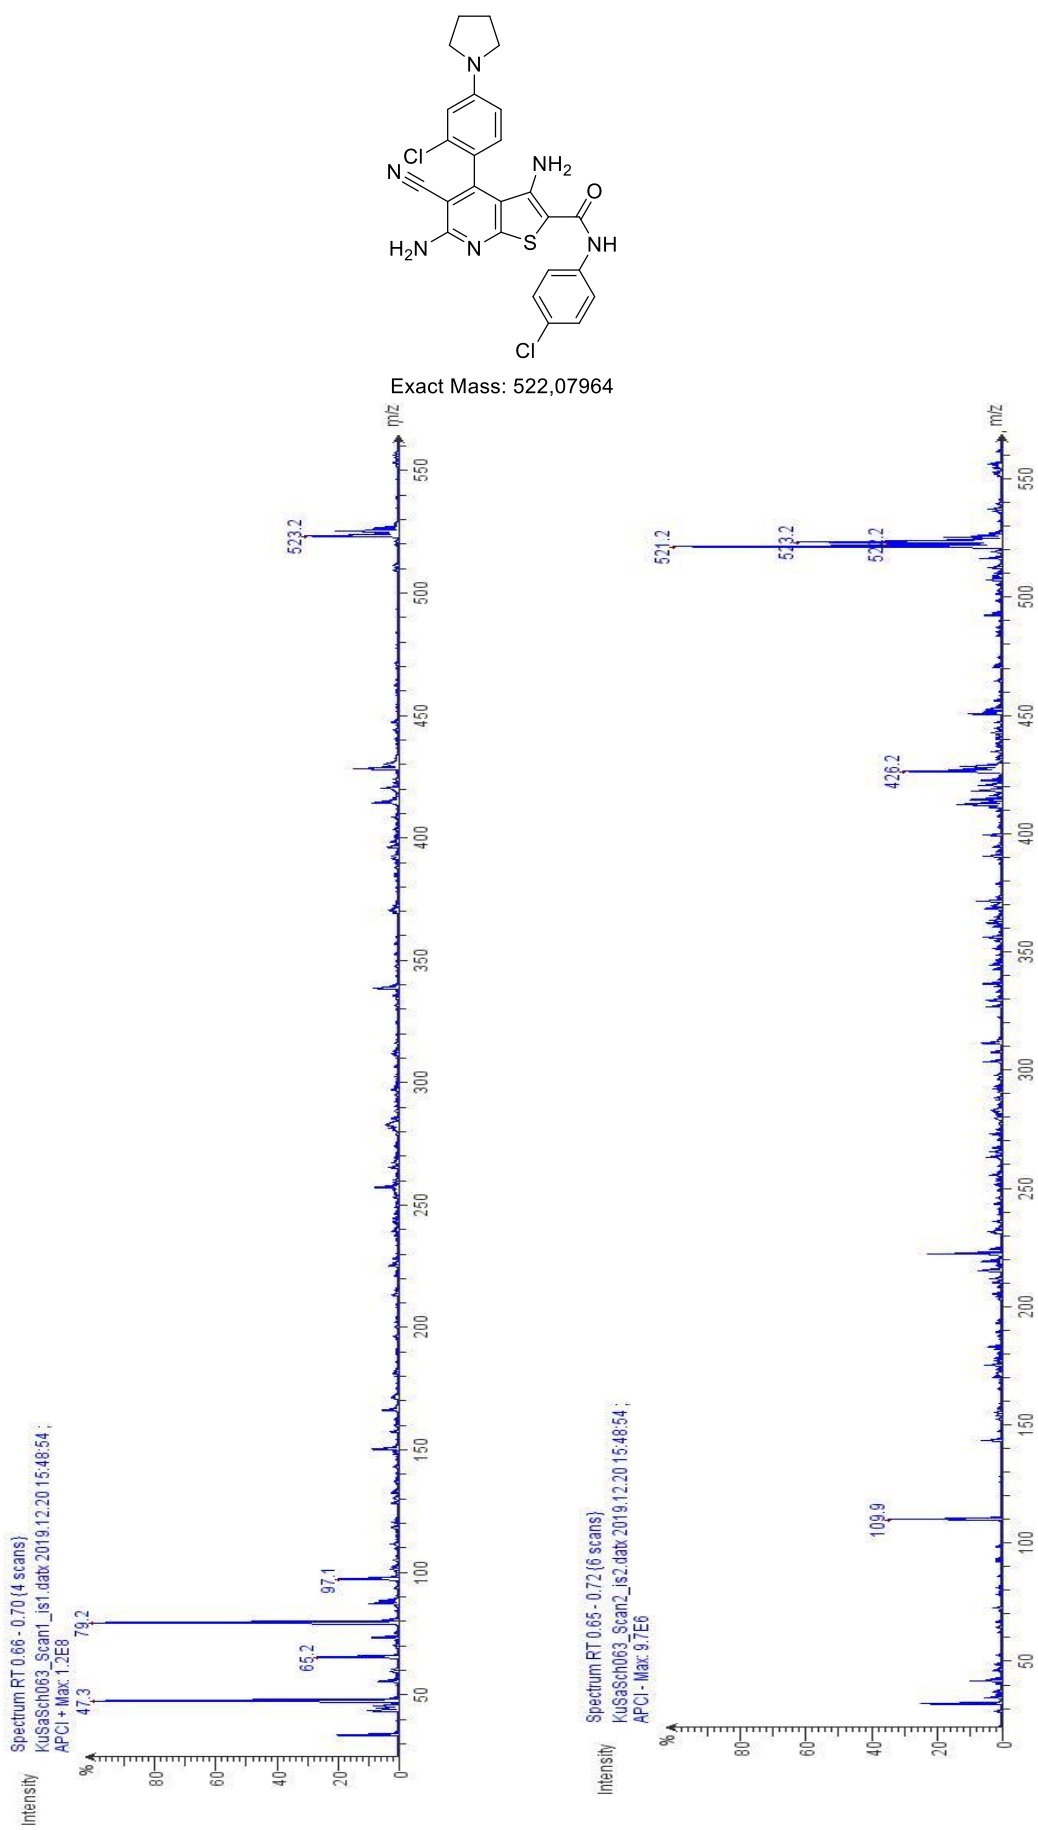

Figure S32:  $^1\text{H-NMR}$  spectrum of **9ac** (KuSaSch073).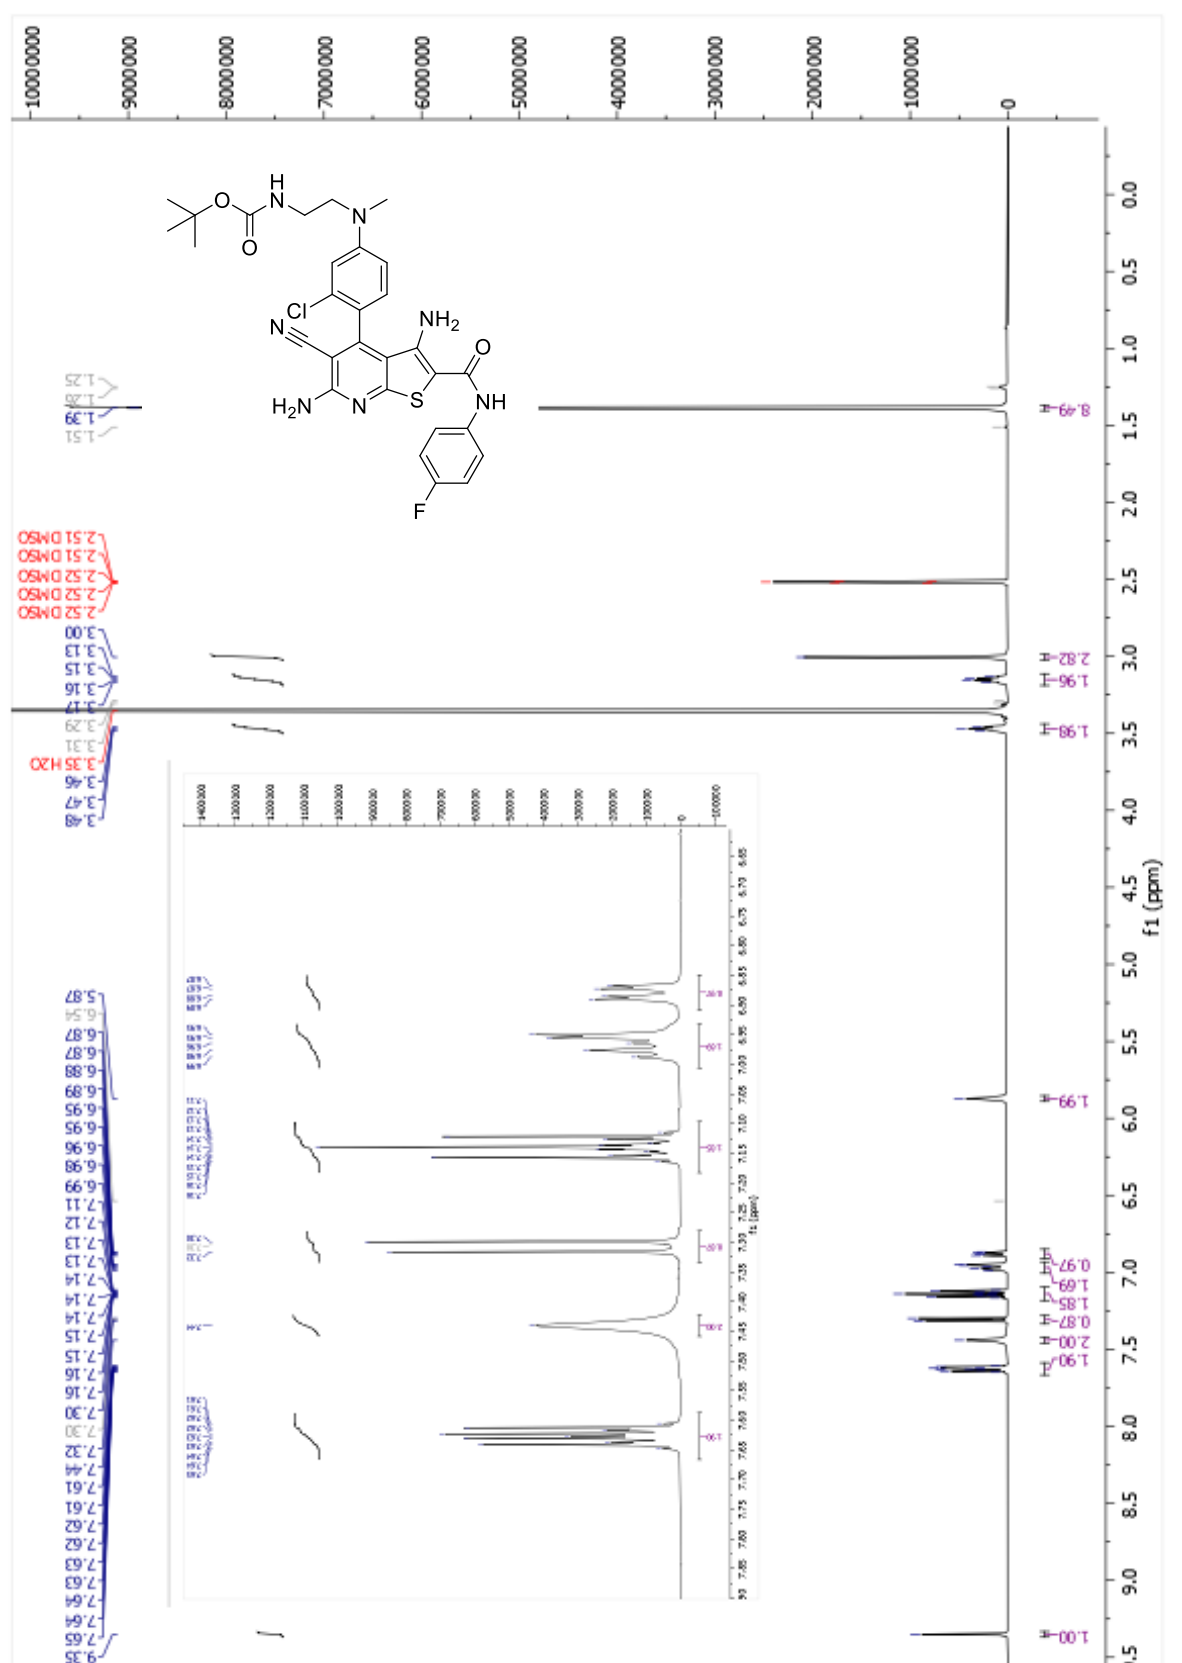



Figure S33:  $^{13}\text{C}$ -NMR spectrum of **9ac** (KuSaSch073).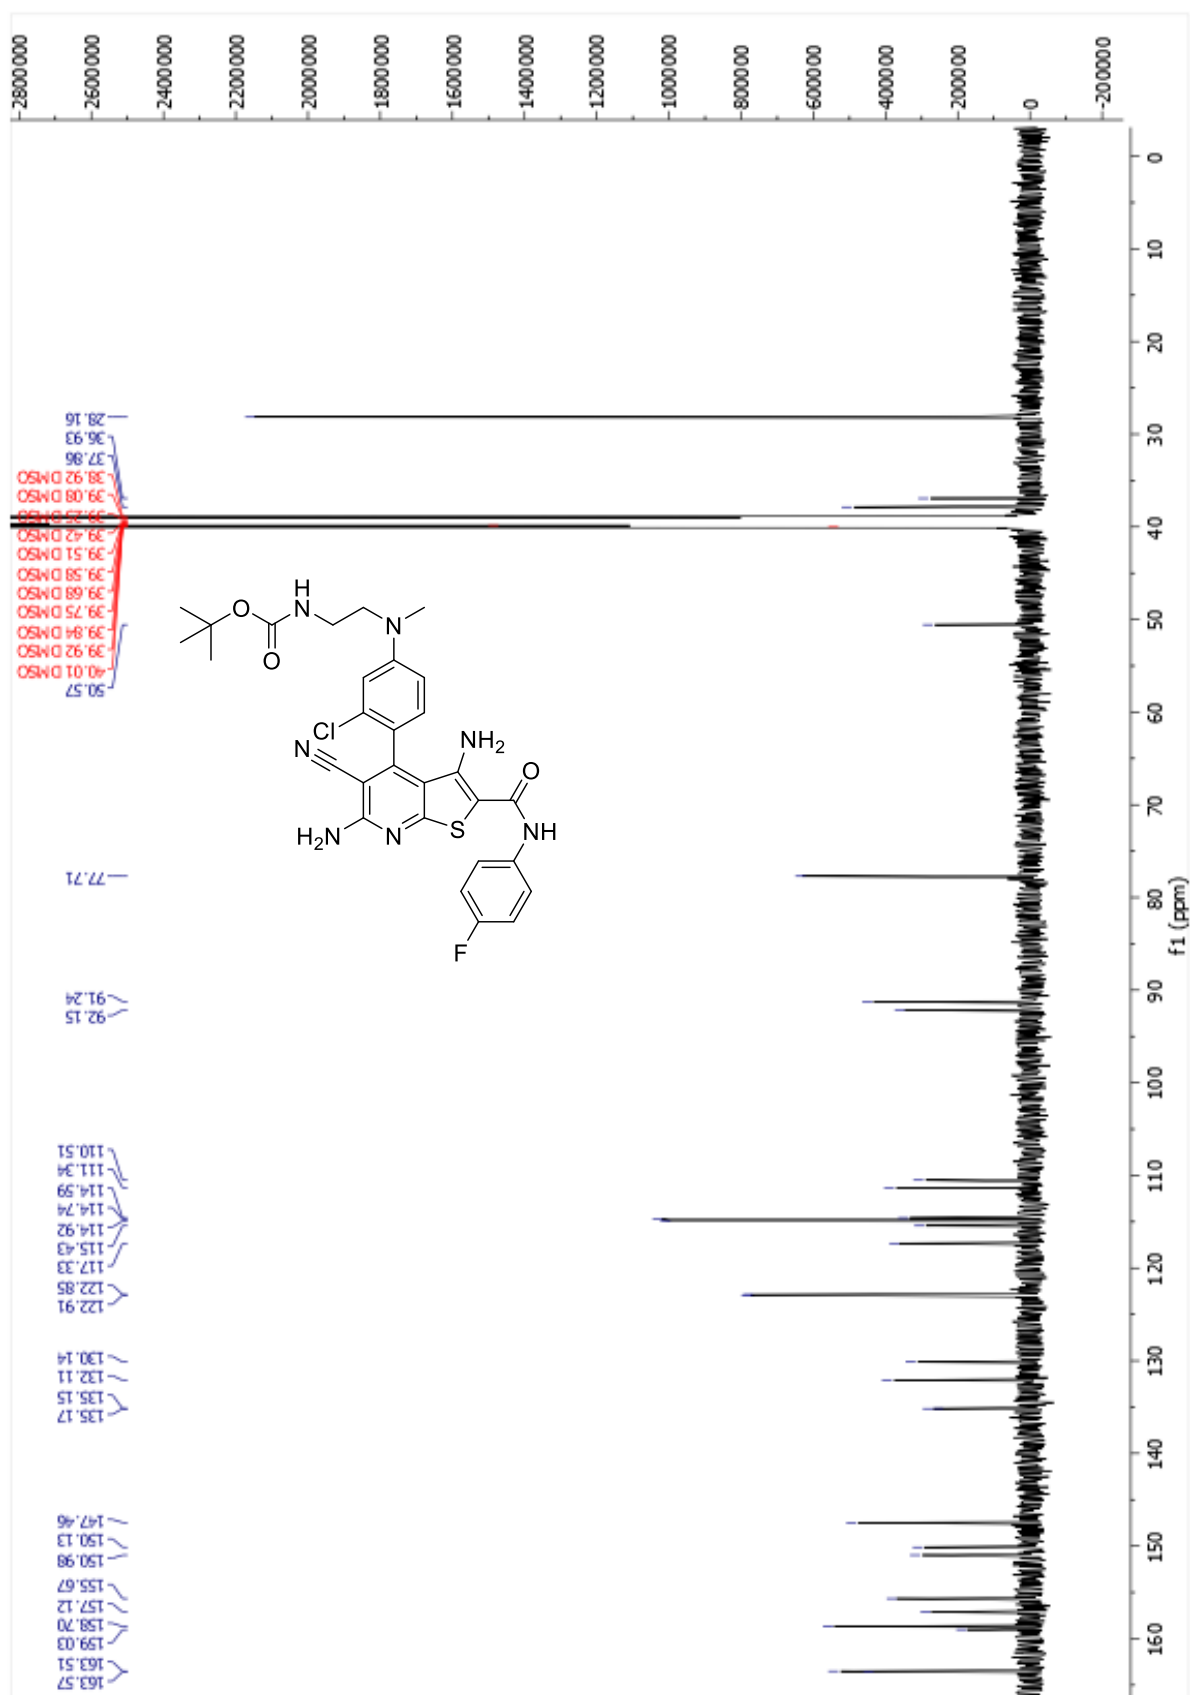

Figure S34: IR spectrum of **9ac** (KuSaSch073).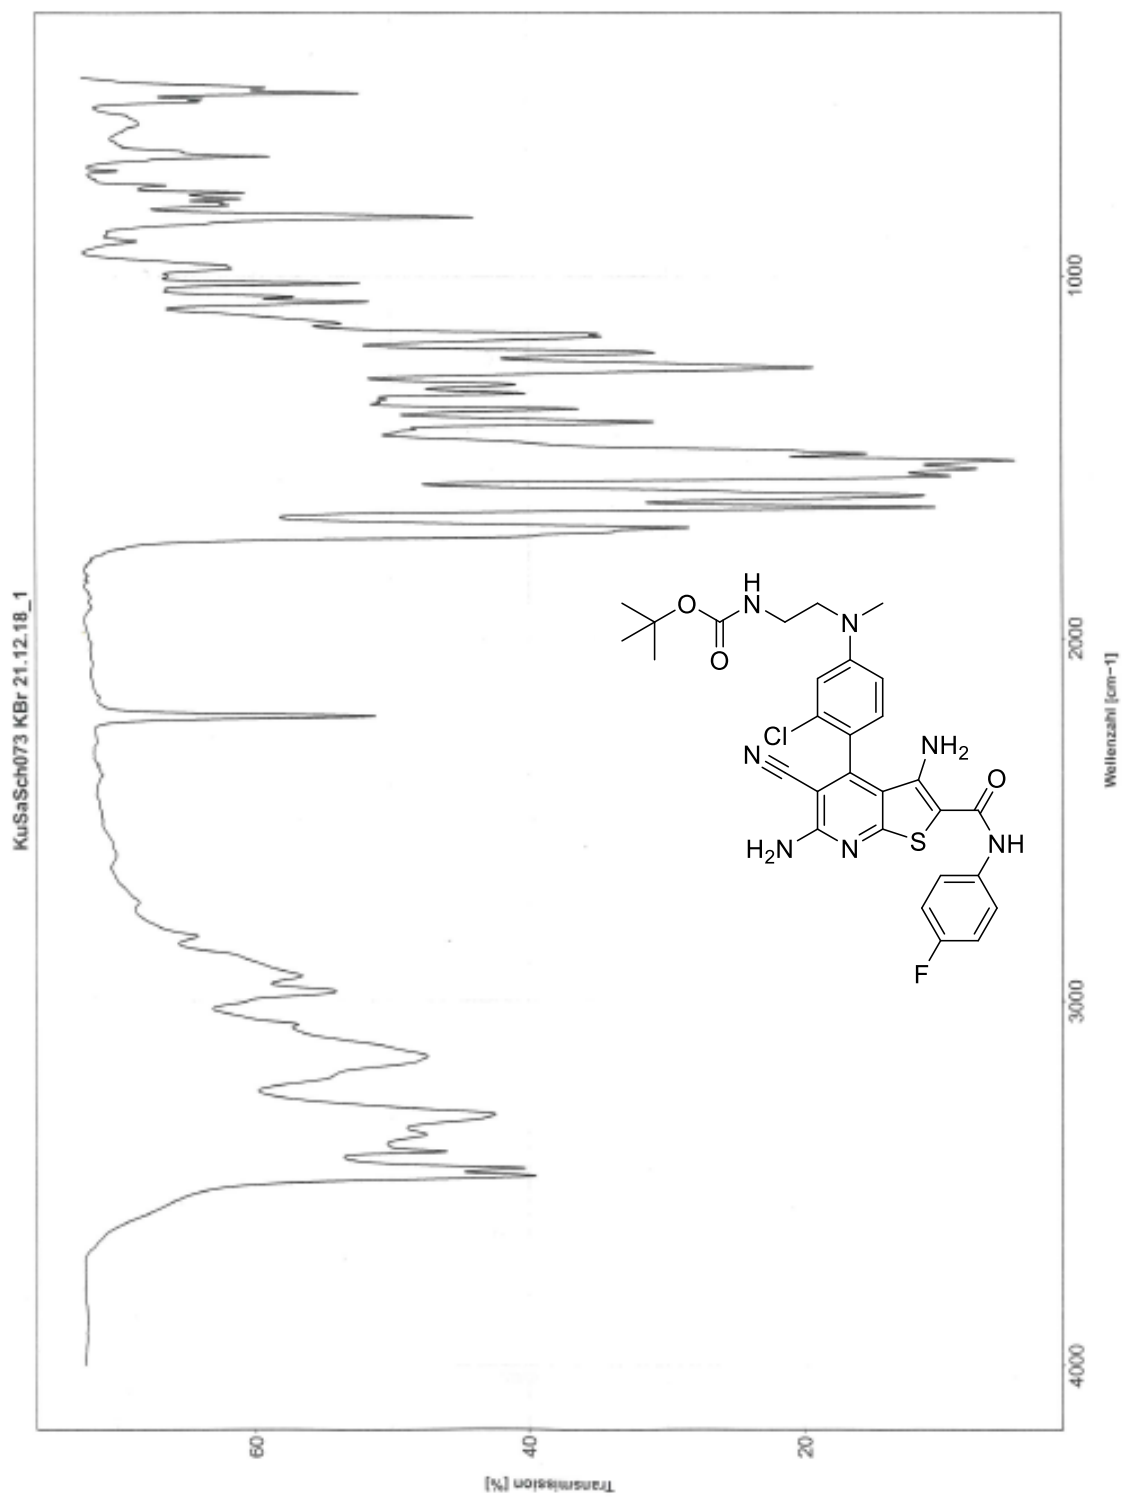

Figure S35: APCI-MS spectrum of **9ac** (KuSaSch073).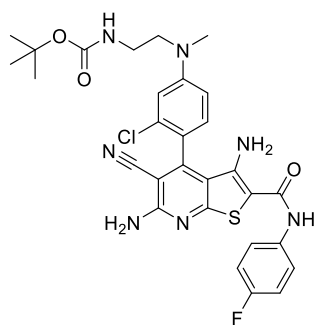

Exact Mass: 609,17251

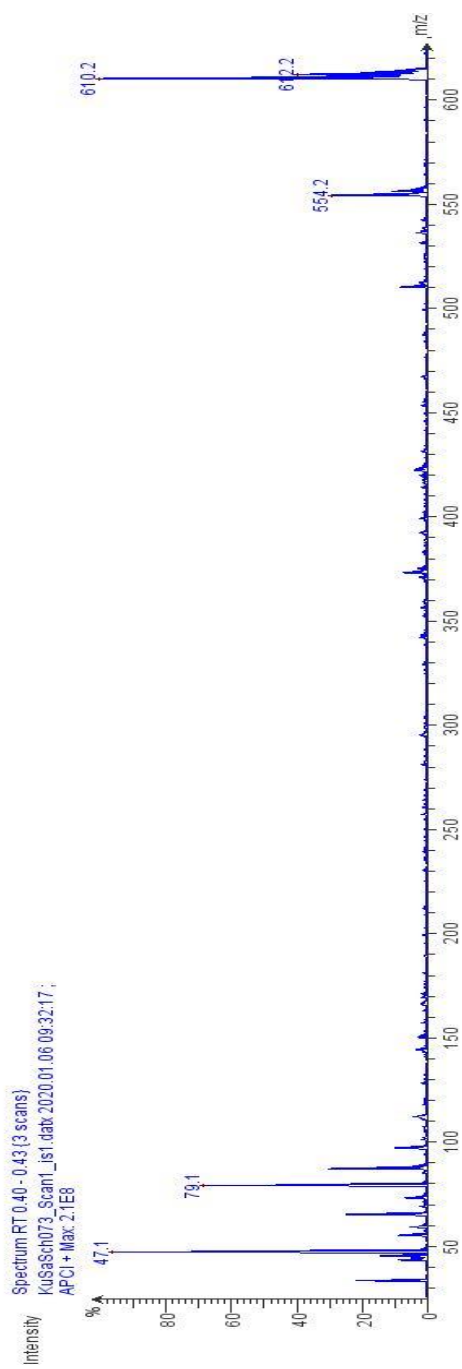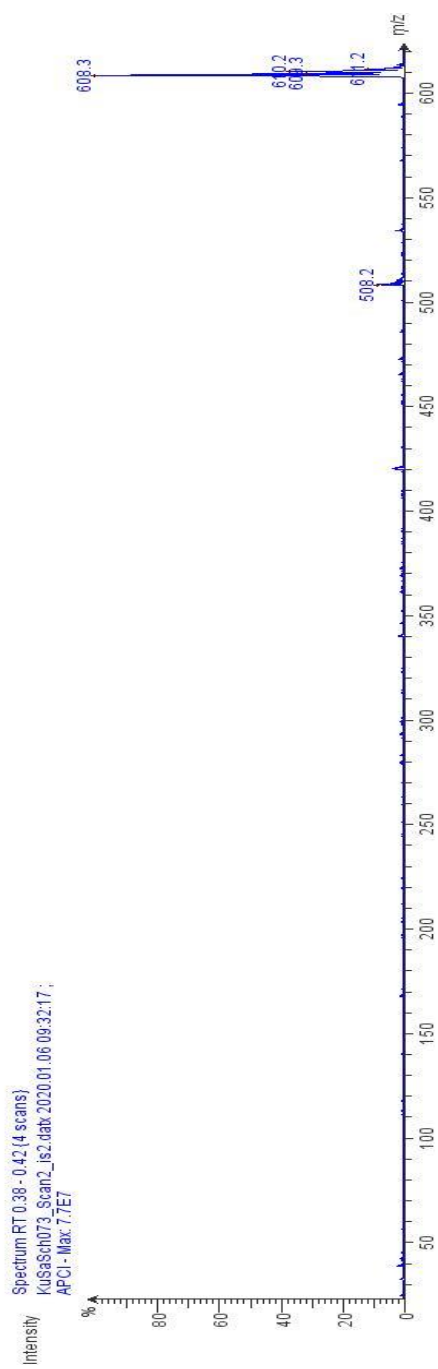

Figure S36:  $^1\text{H-NMR}$  spectrum of **17a** (KuSaSch095).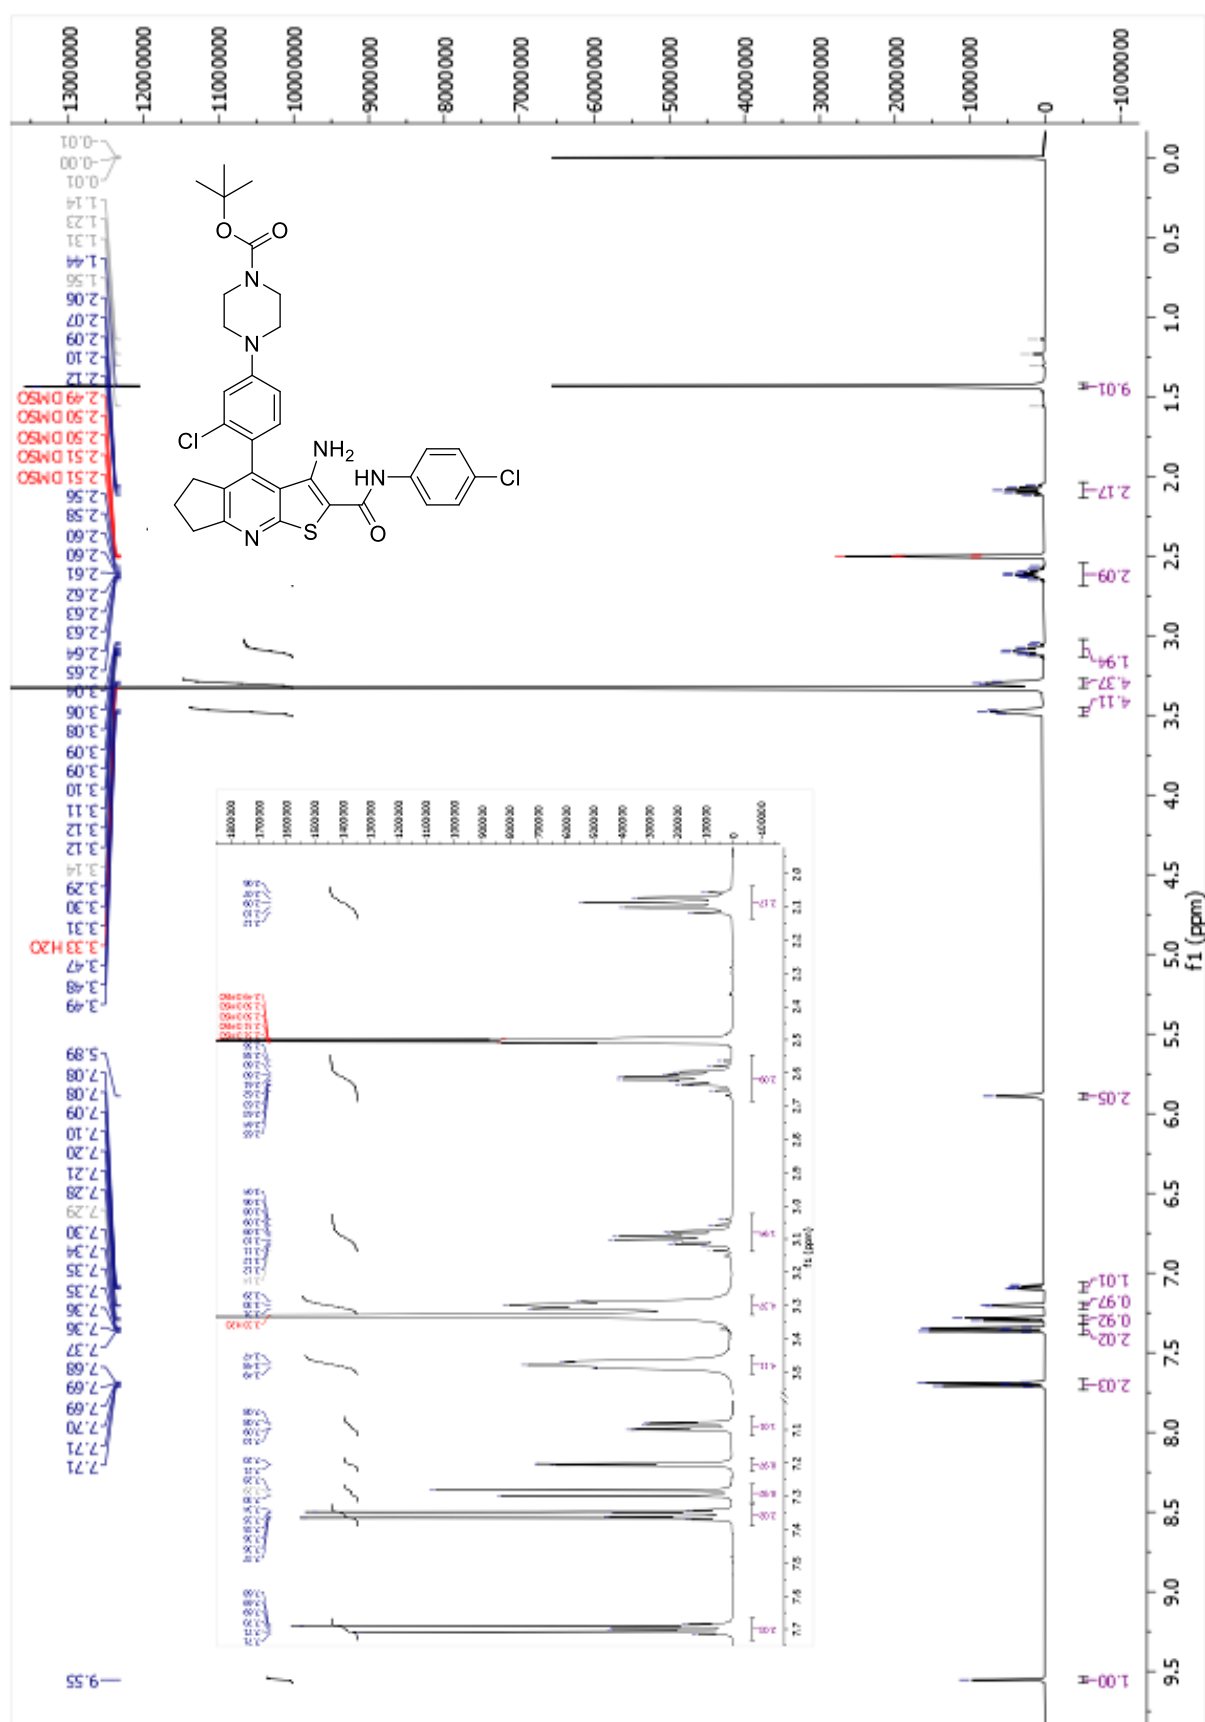

Figure S37:  $^{13}\text{C}$ -NMR spectrum of **17a** (KuSaSch095).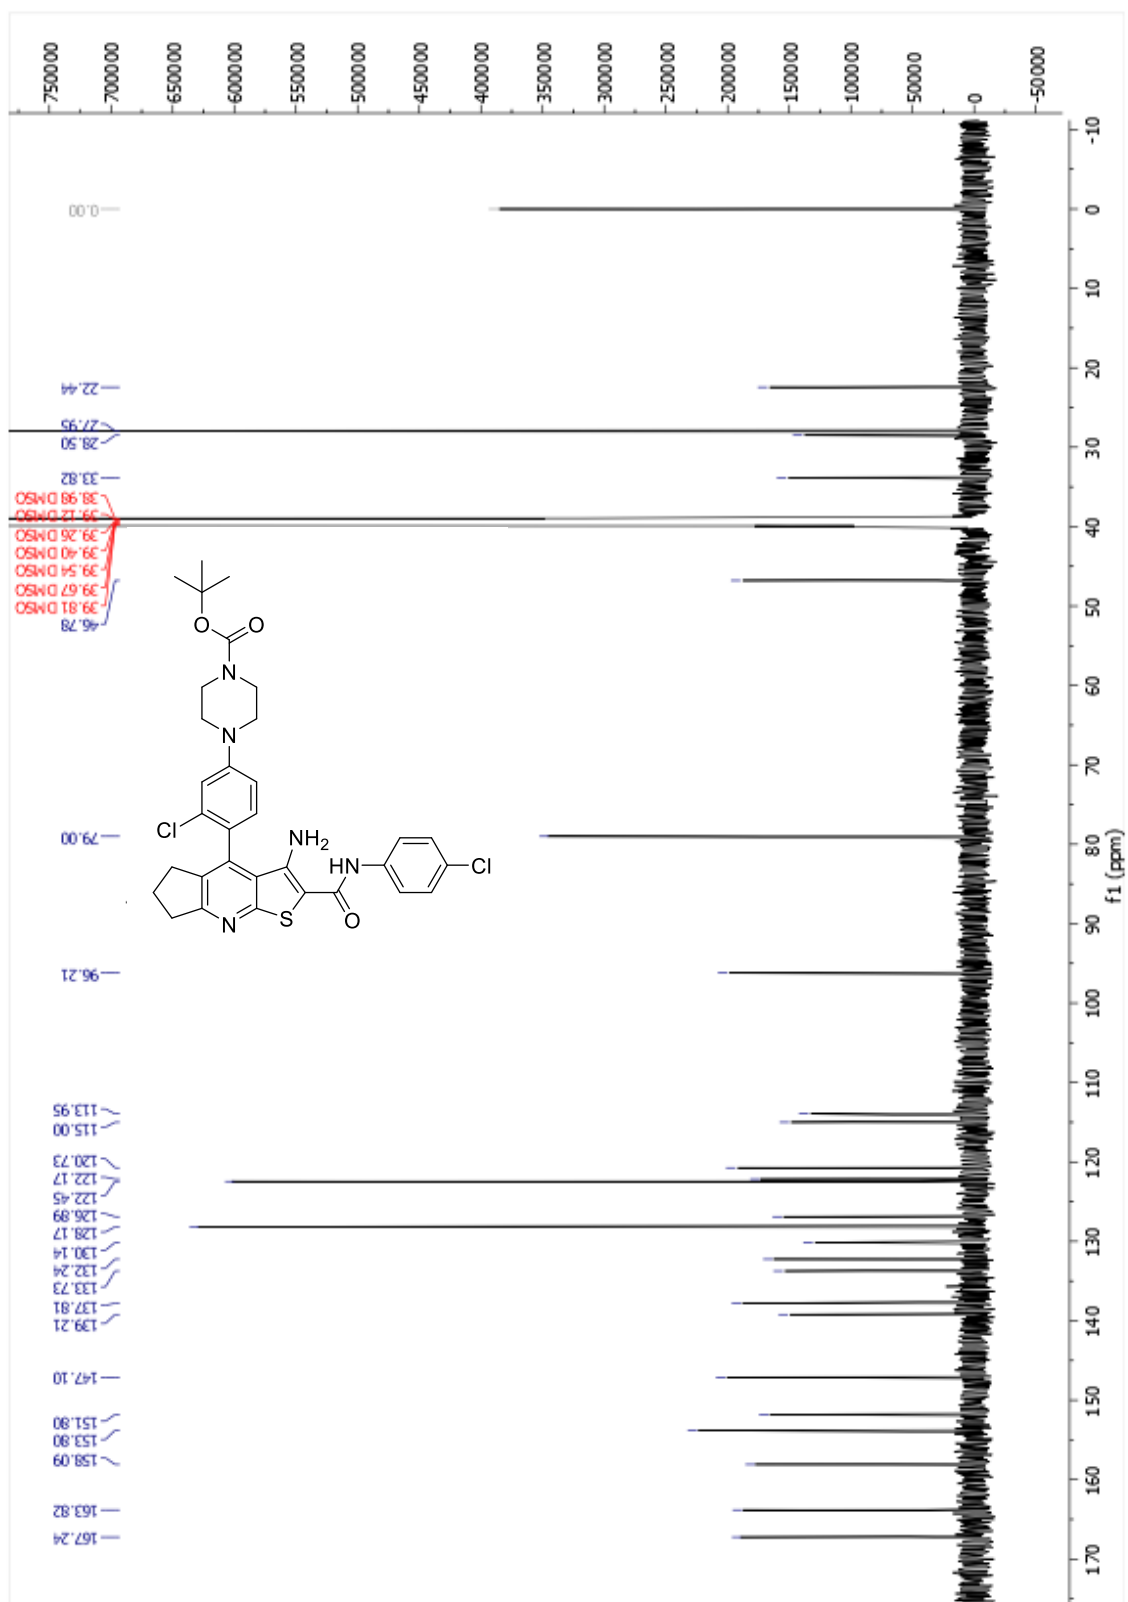

Figure S38: HSCQ-NMR spectrum of **17a** (KuSaSch095). The black circle confirms 4 protons under a missing signal for two carbons.

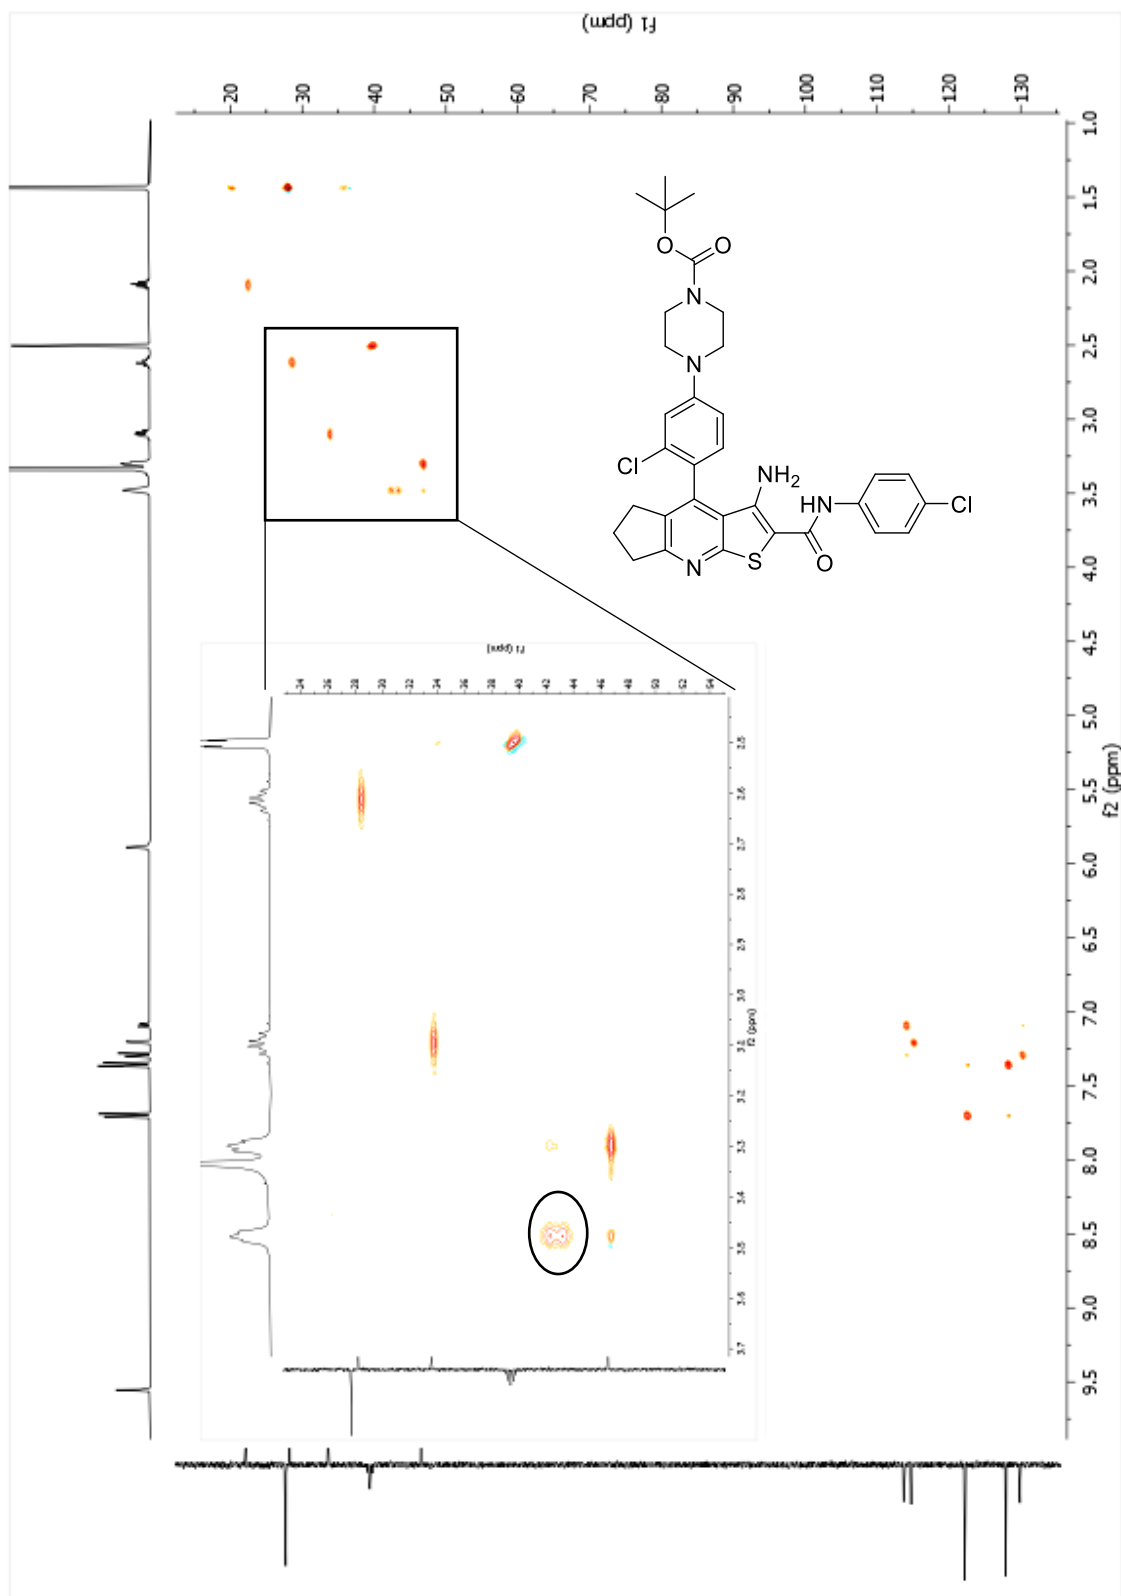

Figure S39: IR spectrum of **17a** (KuSaSch095).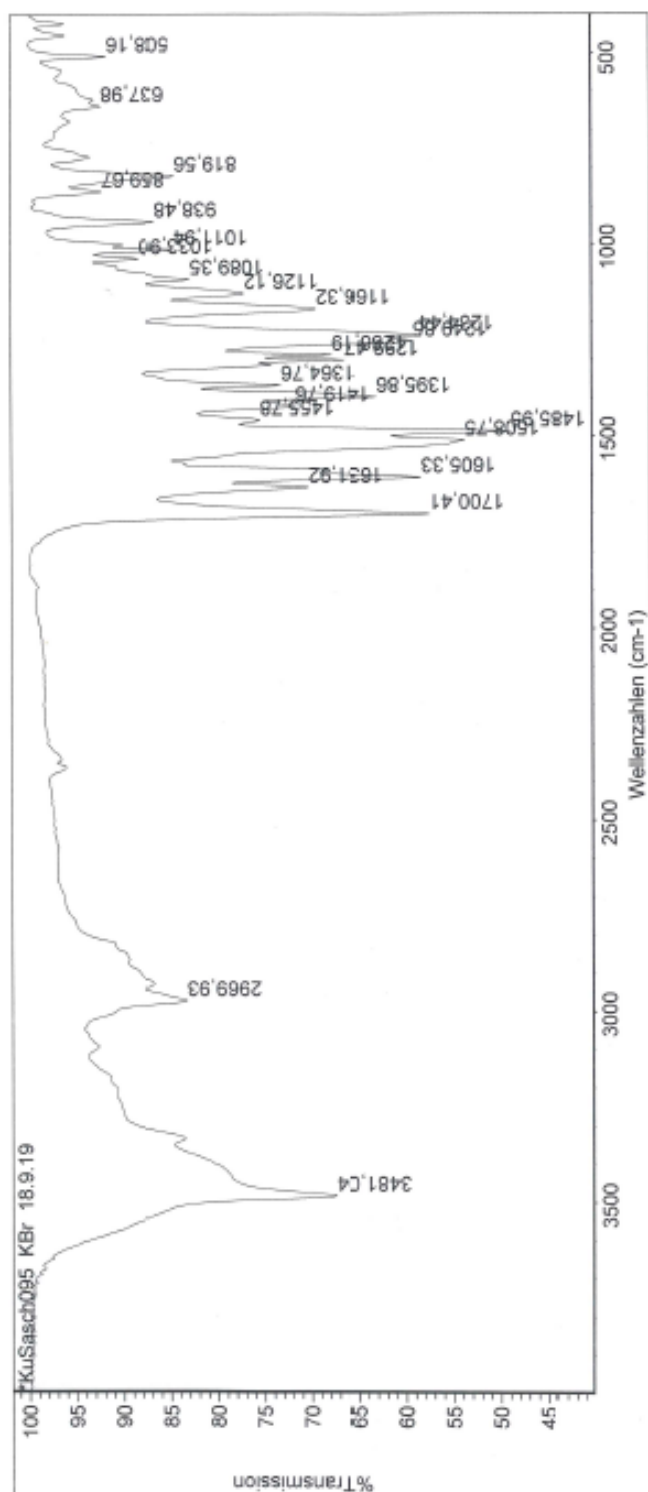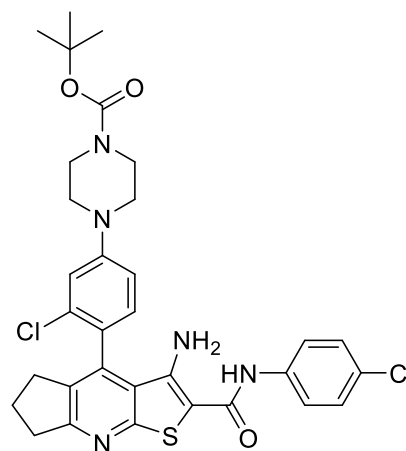

Wed Sep 18 11:41:24 2019 (GMT+02:00)

SUCHE BANDEN:

Spektrum: \*KuSaSch095 KBr 18.9.19

Bereich: 3998,04 400,00

Absoluter Schwellwert: 92,448

Sensitivität: 50

Bandentabelle:

|           |         |             |        |
|-----------|---------|-------------|--------|
| Position: | 1485,95 | Intensität: | 48,784 |
| Position: | 1508,75 | Intensität: | 53,652 |
| Position: | 1700,41 | Intensität: | 57,404 |
| Position: | 1234,44 | Intensität: | 58,445 |
| Position: | 1605,33 | Intensität: | 58,309 |
| Position: | 1249,85 | Intensität: | 59,121 |
| Position: | 1395,86 | Intensität: | 63,019 |

Figure S40: APCI-MS spectrum of **17a** (KuSaSch095).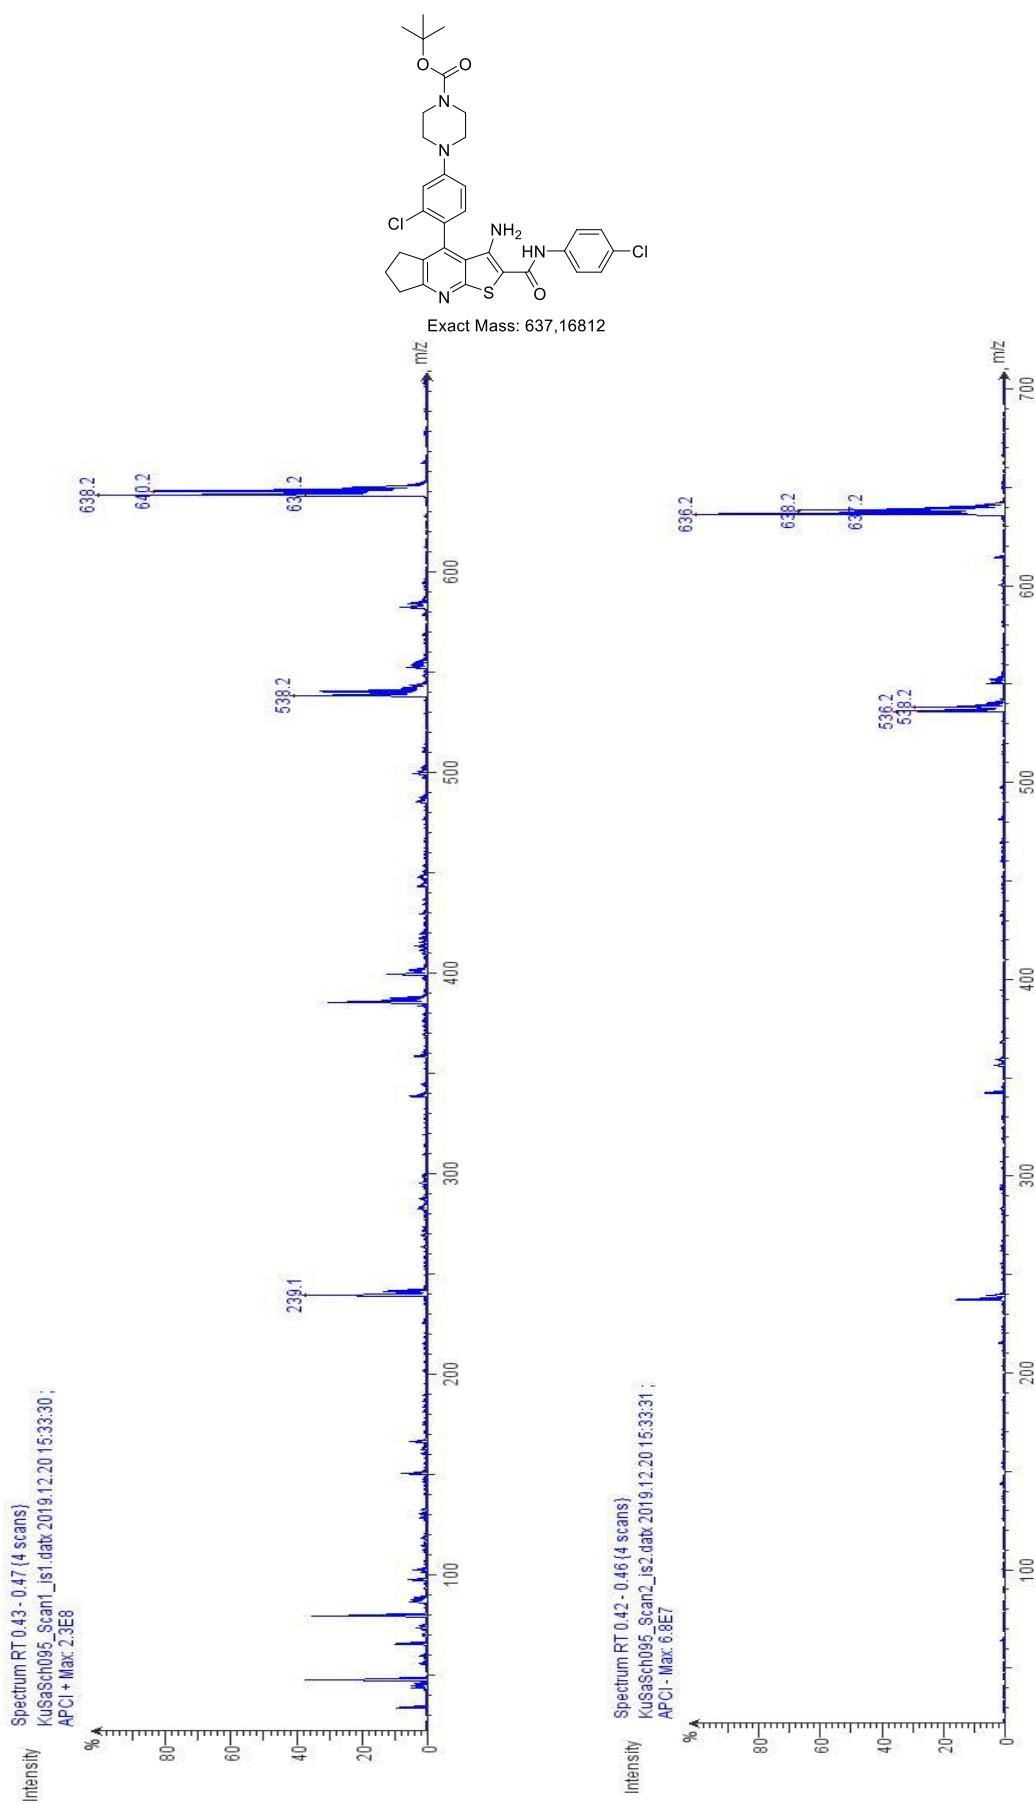





Figure S42:  $^{13}\text{C}$ -NMR spectrum of **17b** (KuSaSch100).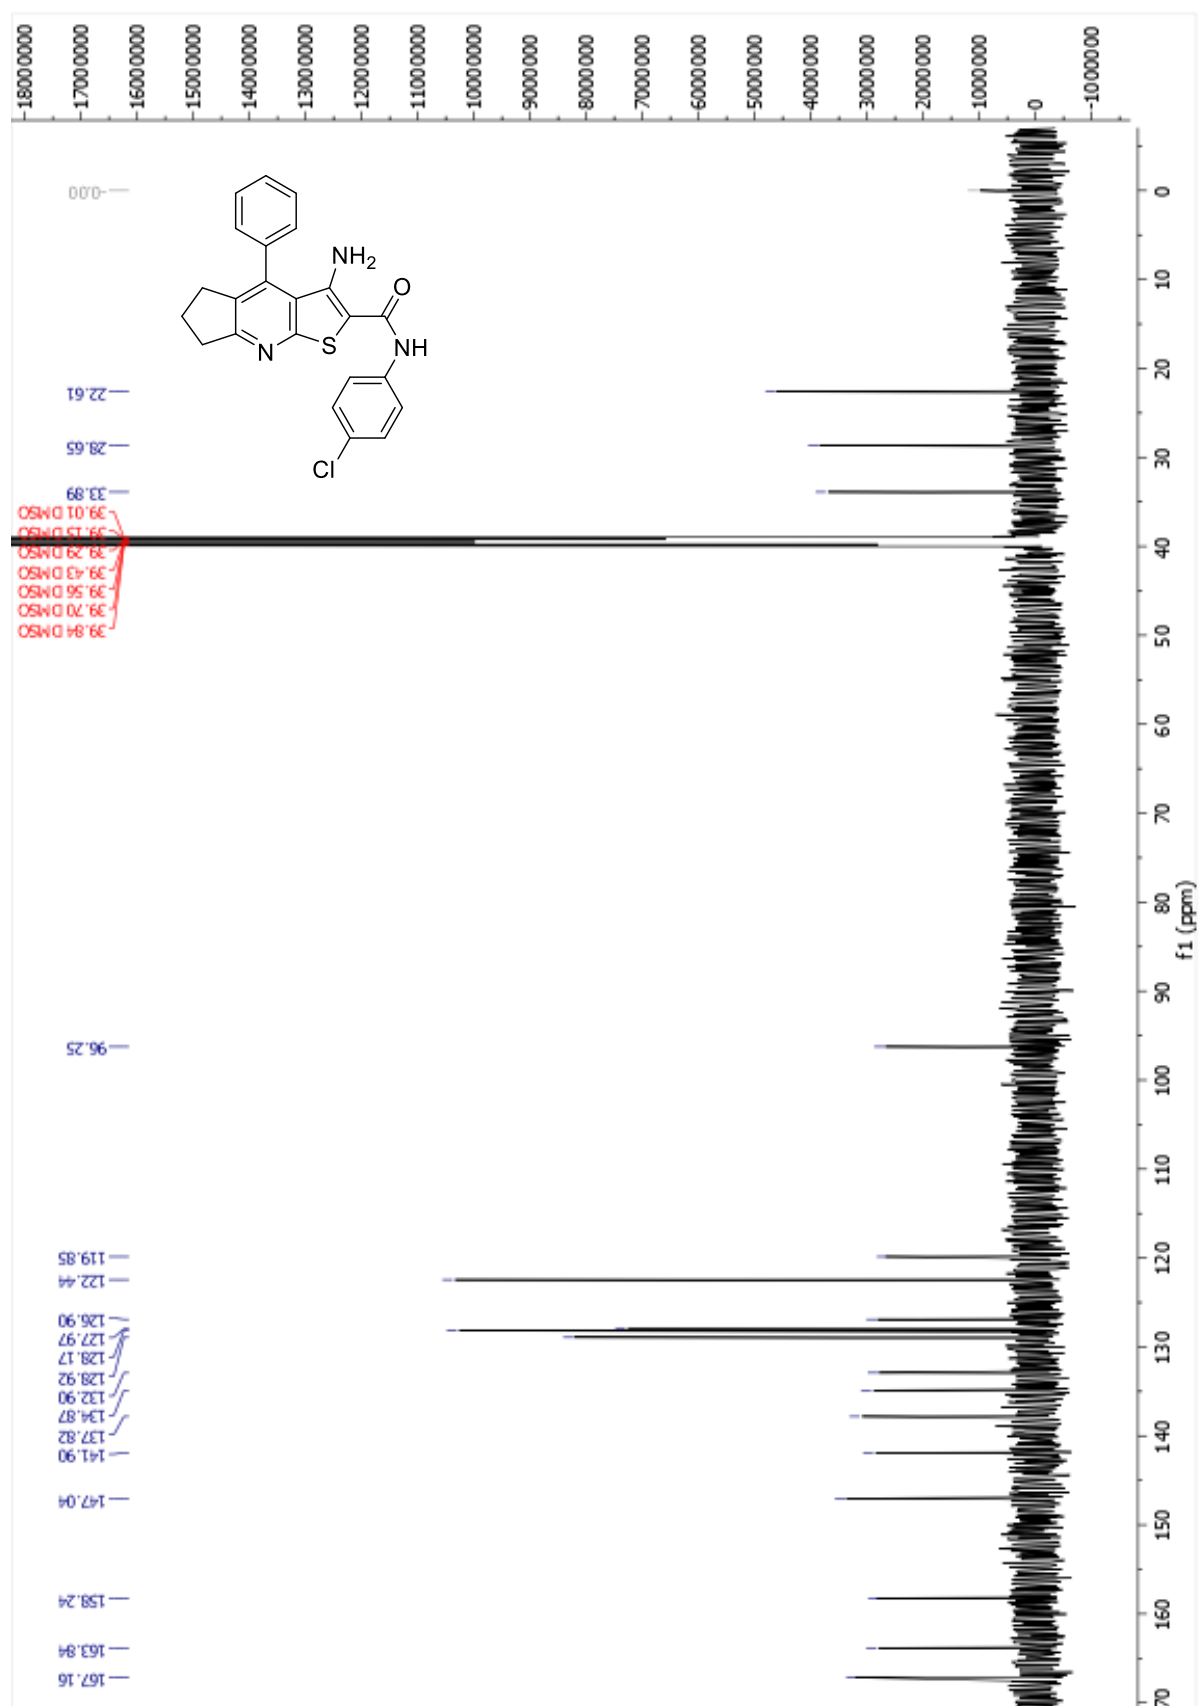

Figure S43: HSQC-NMR spectrum of **17b** (KuSaSch100). The black circle confirms 3 protons under one carbon signal.

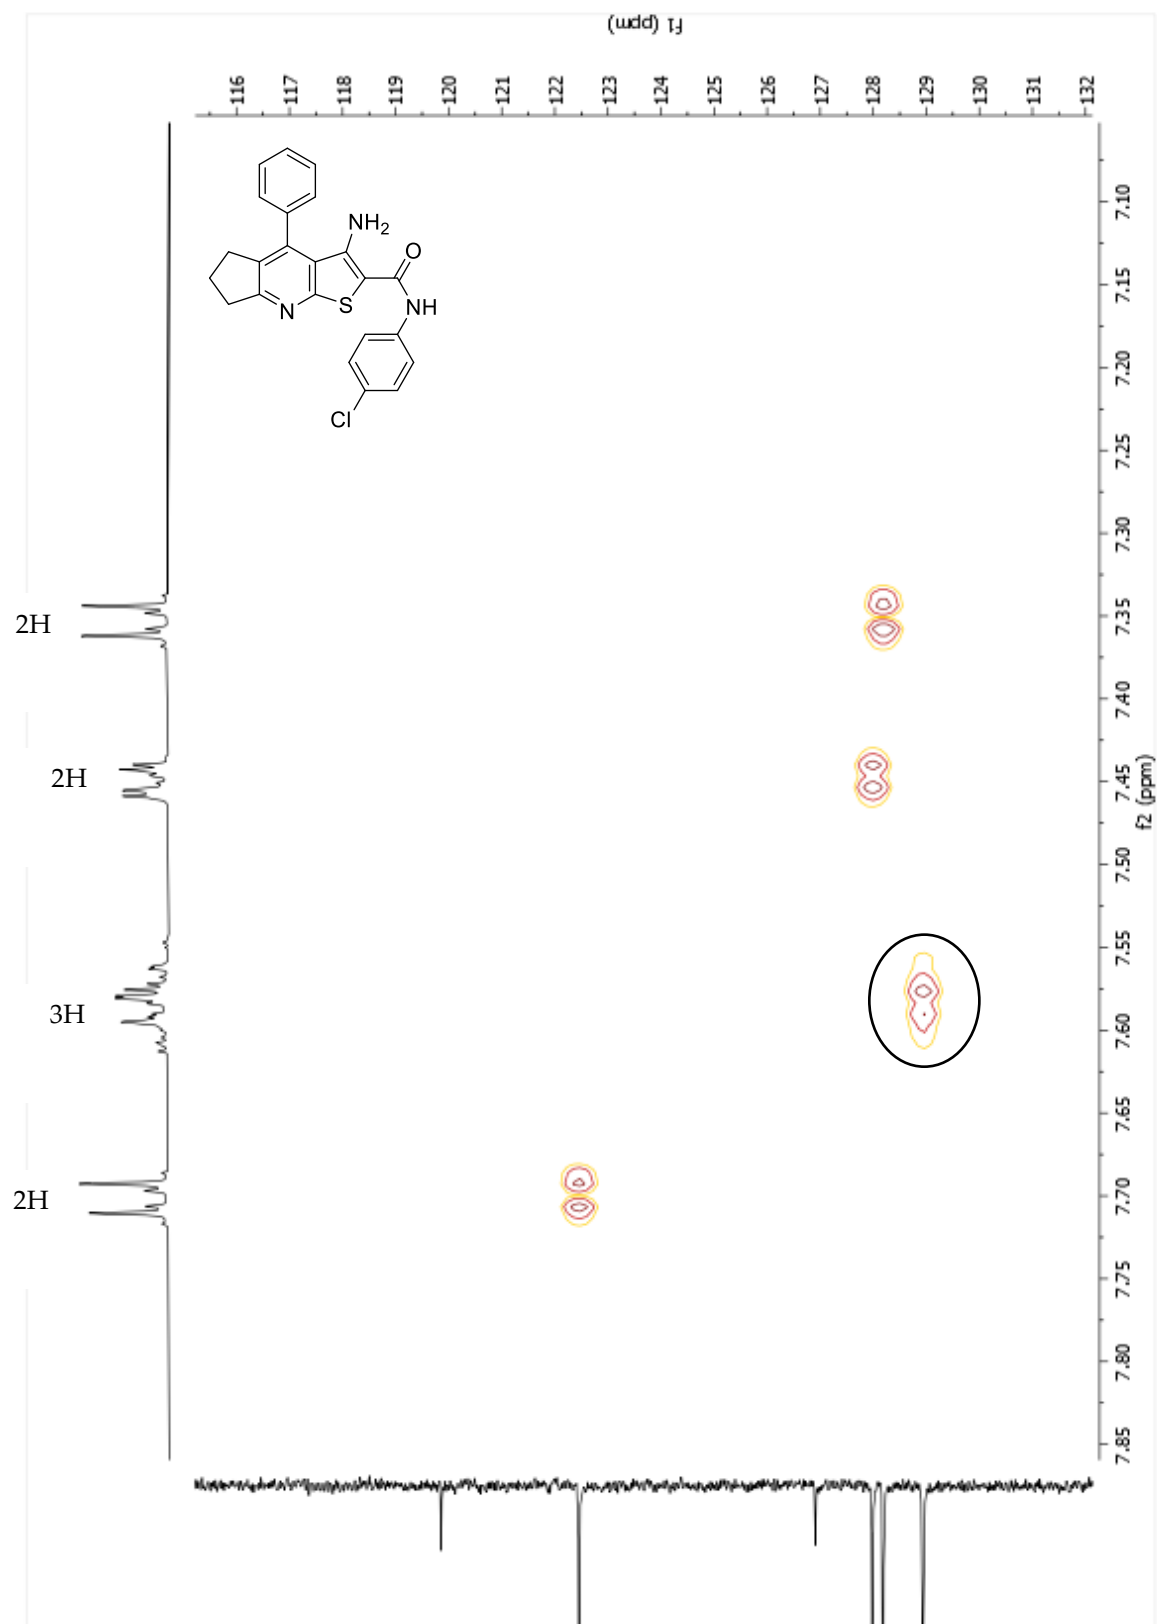

Figure S44: IR spectrum of **17b** (KuSaSch100).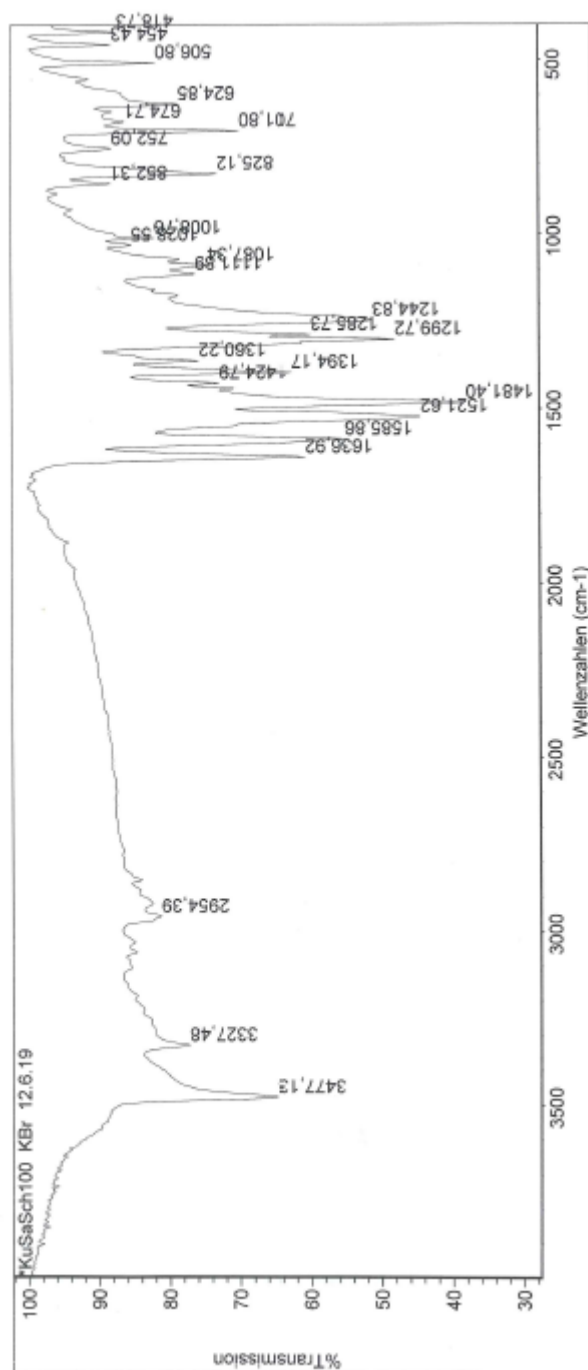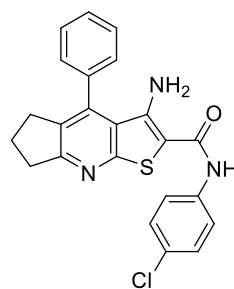

Wed Jun 12 14:06:44 2019 (GMT+02:00)

SUCHE BANDEN:

Spektrum: \*KuSaSch100 KBr 12.6.19

Bereich: 3999,64 400,00

Absoluter Schwellwert: 86,637

Sensitivität: 50

Bandentabelle:

| Position: | Intensität: |
|-----------|-------------|
| 1481,40   | 37,978      |
| 1521,62   | 44,386      |
| 1299,72   | 48,001      |
| 1244,83   | 51,089      |
| 1585,86   | 55,020      |
| 1285,73   | 59,849      |
| 1636,92   | 60,641      |

Figure S45: APCI-MS spectrum of **17b** (KuSaSch100).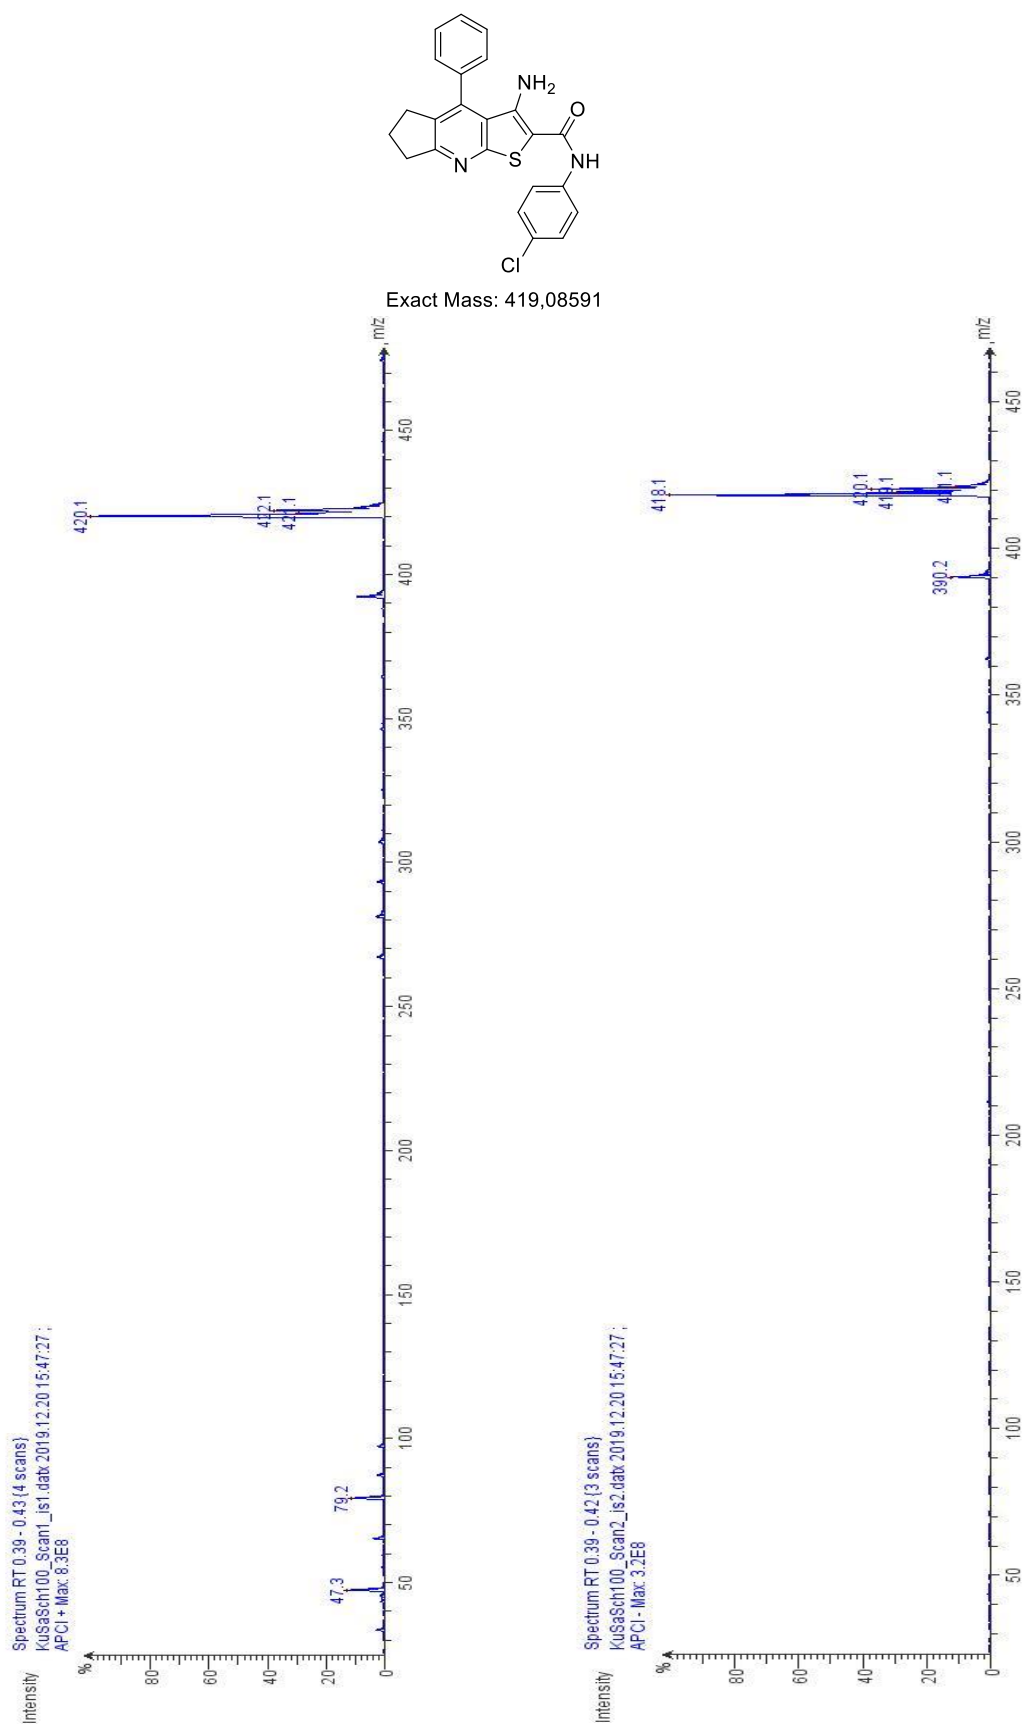

Figure S46: <sup>1</sup>H-NMR spectrum of **17e** (KuSaSch107).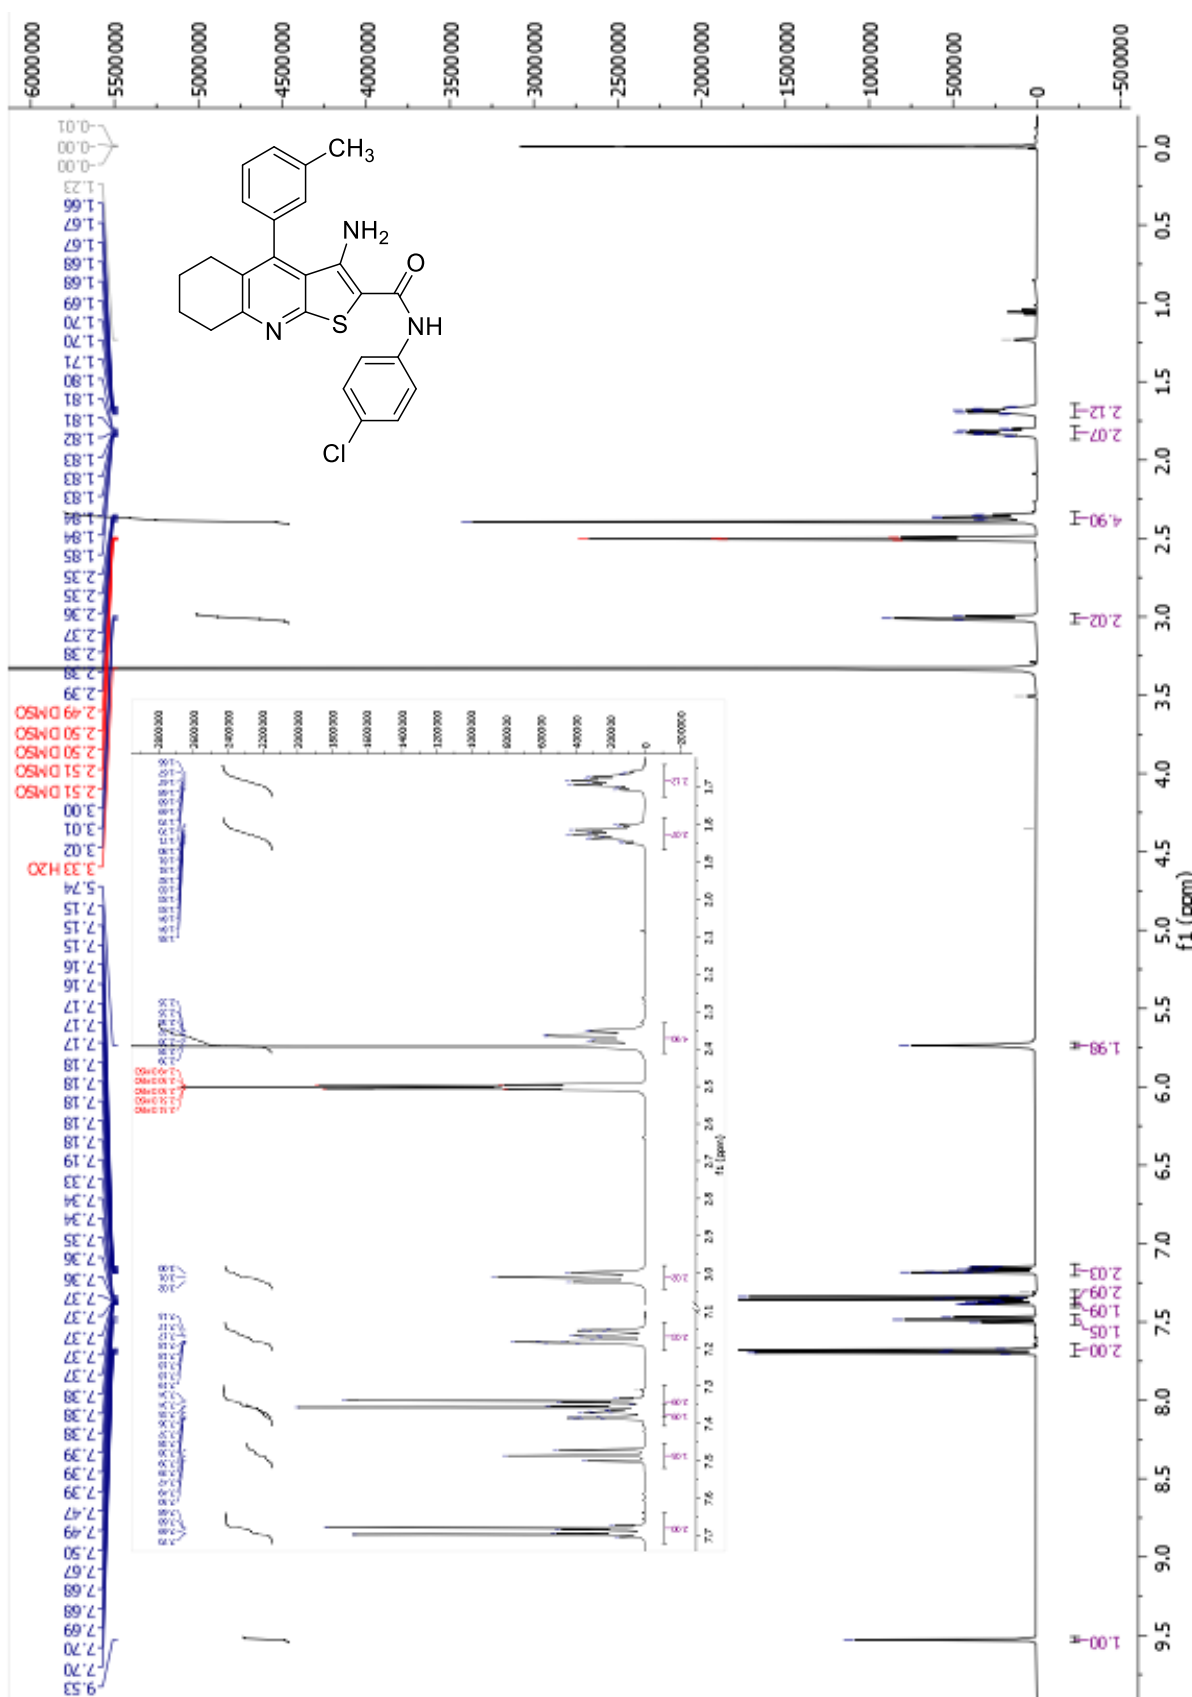

Figure S47:  $^{13}\text{C}$ -NMR spectrum of **17e** (KuSaSch107).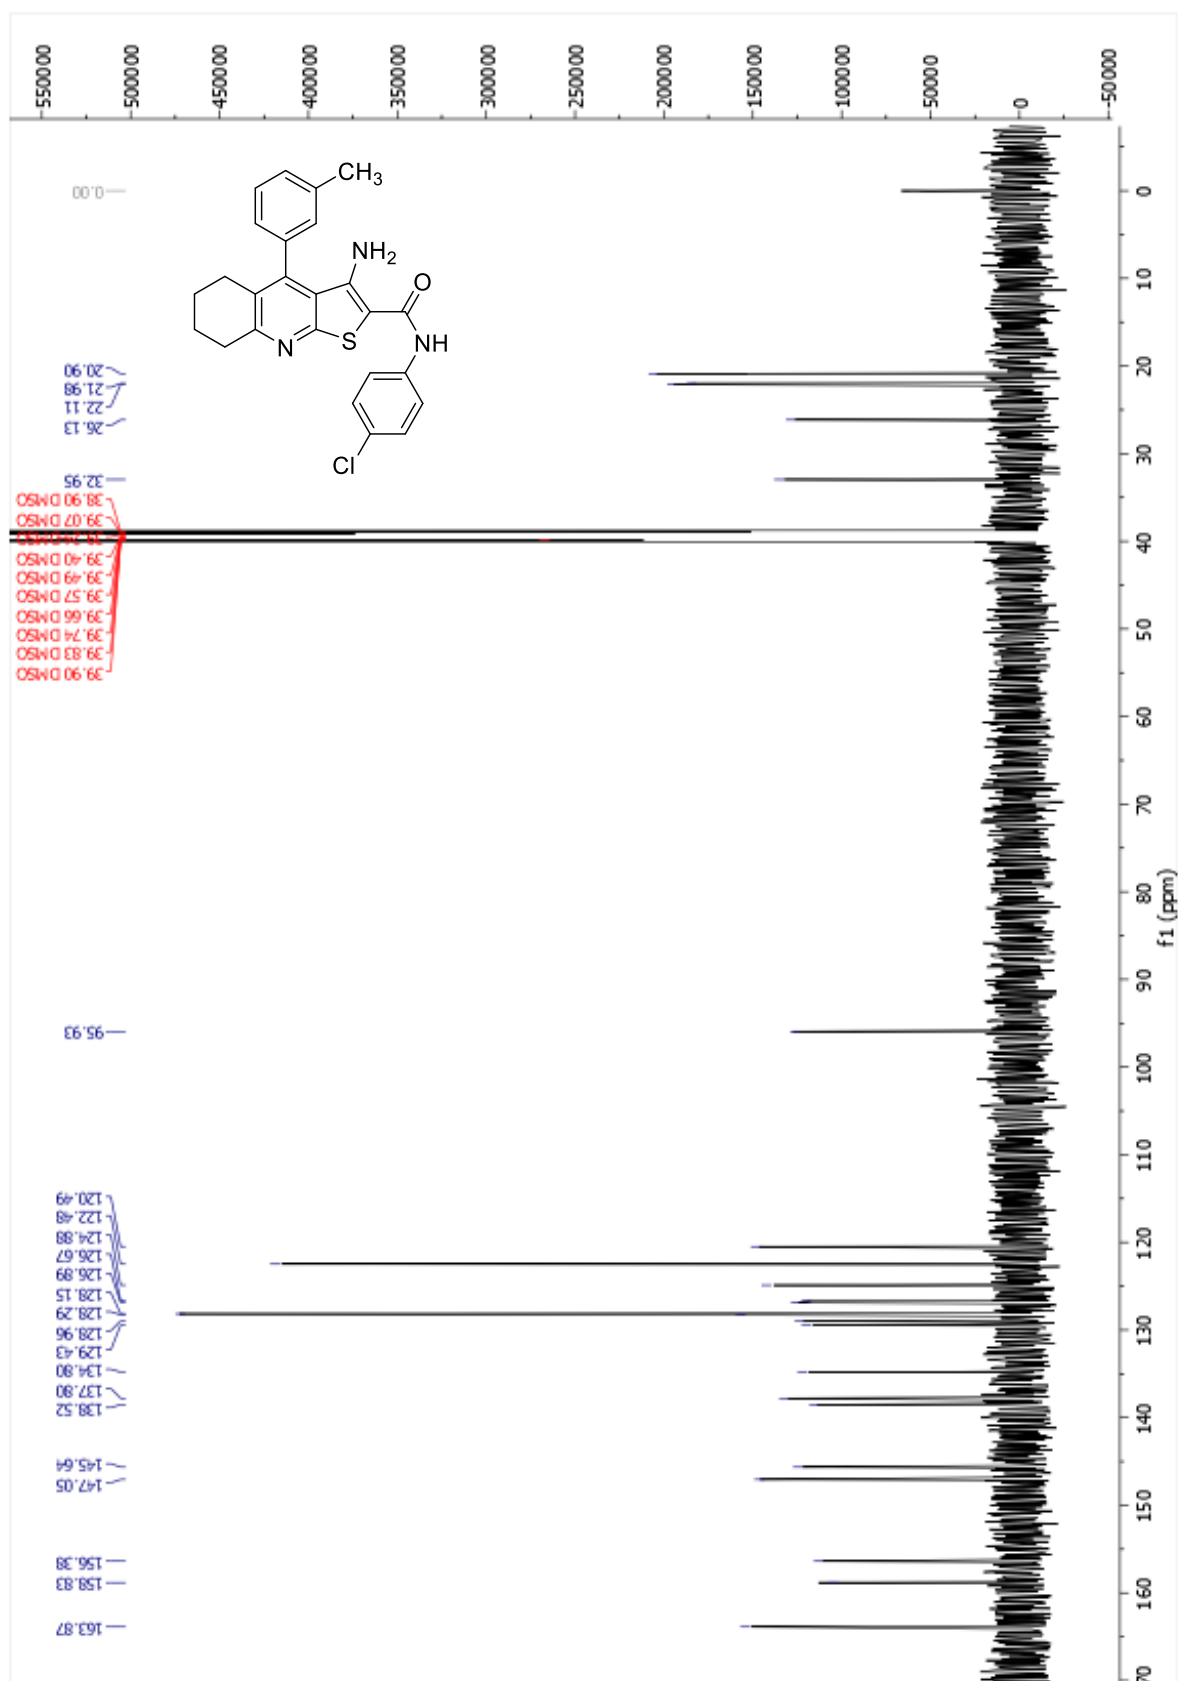

Figure S48: IR spectrum of **17e** (KuSaSch107).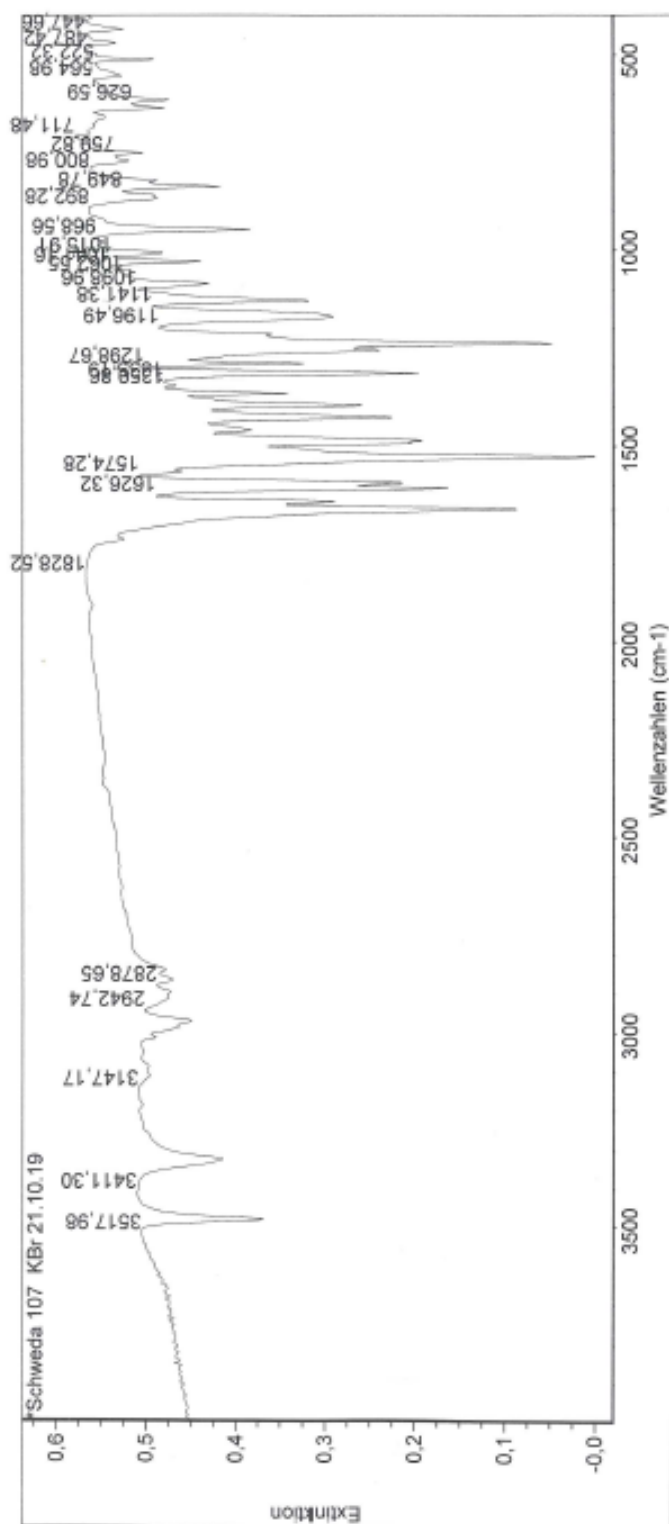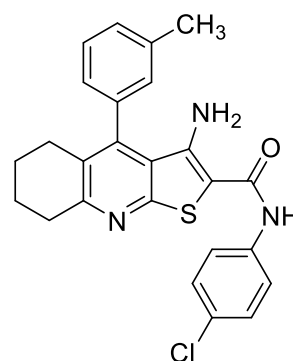

Mon Okt 21 13:06:42 2019 (GMT+02:00)

SUCHE BANDEN:

Spektrum: \*Schweda 107 KBr 21.10.19

Bereich: 3999,64 400,00

Absoluter Schwellwert: 0,467

Sensitivität: 60

Bandentabelle:

|           |         |             |       |
|-----------|---------|-------------|-------|
| Position: | 711,48  | Intensität: | 0,580 |
| Position: | 447,66  | Intensität: | 0,568 |
| Position: | 1828,52 | Intensität: | 0,567 |
| Position: | 487,42  | Intensität: | 0,565 |
| Position: | 892,28  | Intensität: | 0,563 |
| Position: | 800,98  | Intensität: | 0,563 |
| Position: | 564,98  | Intensität: | 0,558 |



Figure S49: APCI-MS spectrum of **17e** (KuSaSch107).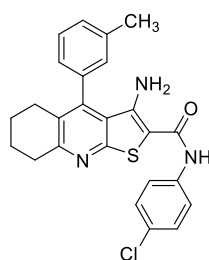

Exact Mass: 447,11721

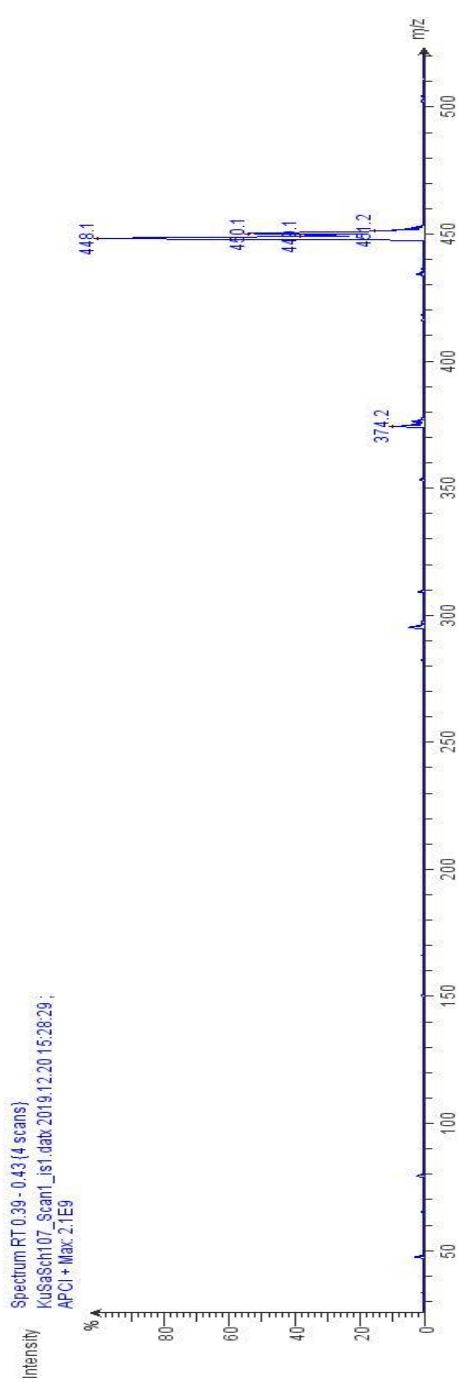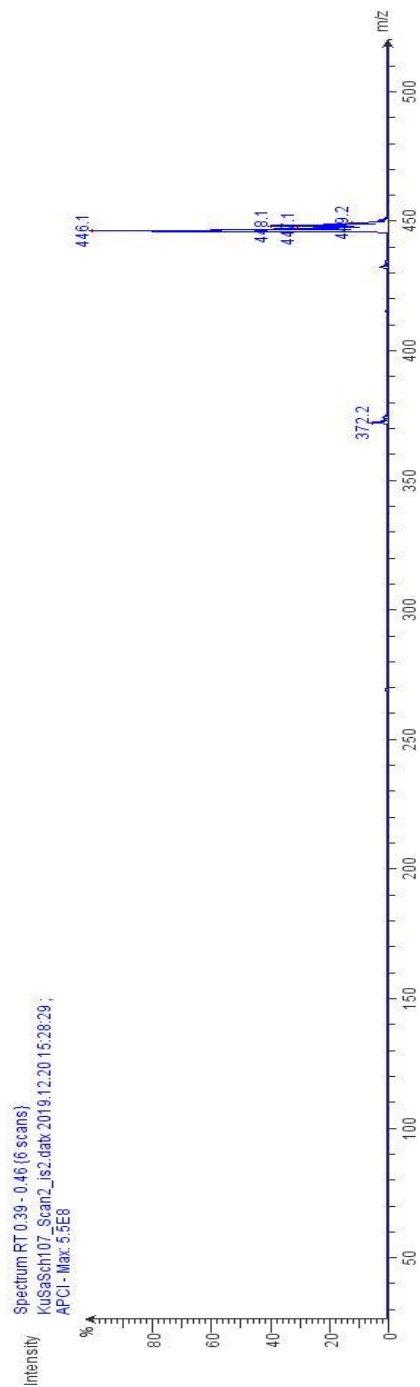



Figure S51:  $^{13}\text{C}$ -NMR spectrum of **17f** (KuSaSch110).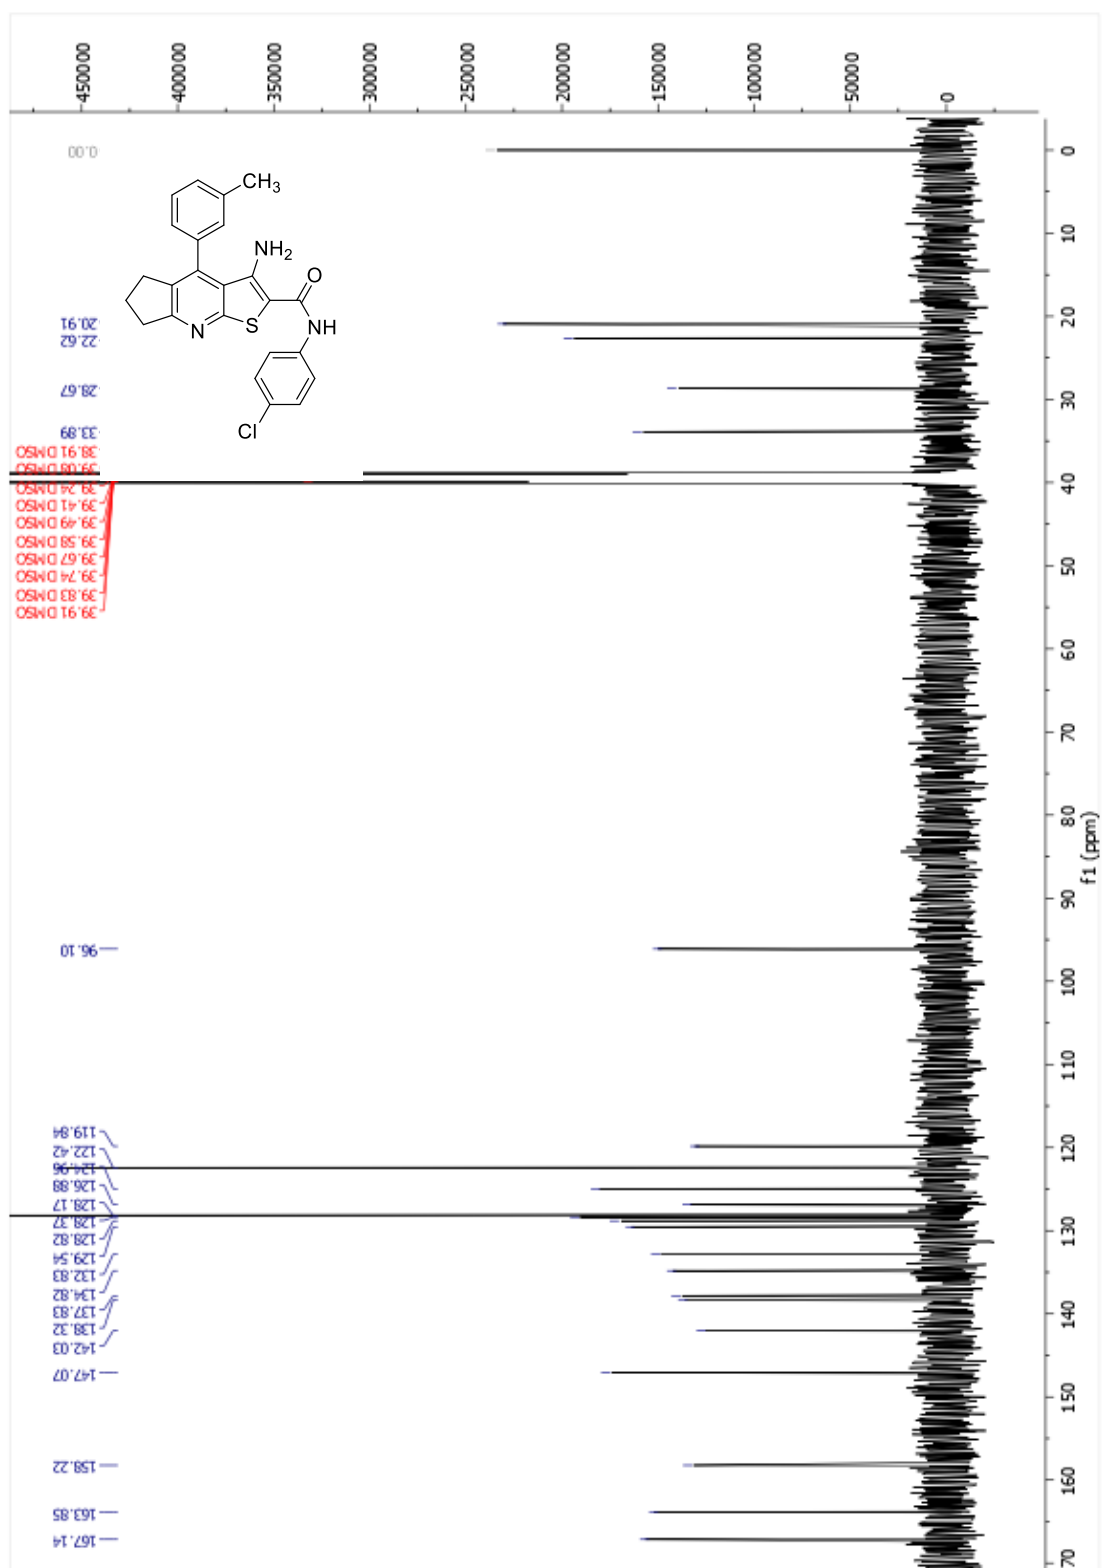

Figure S52: IR spectrum of **17f** (KuSaSch110).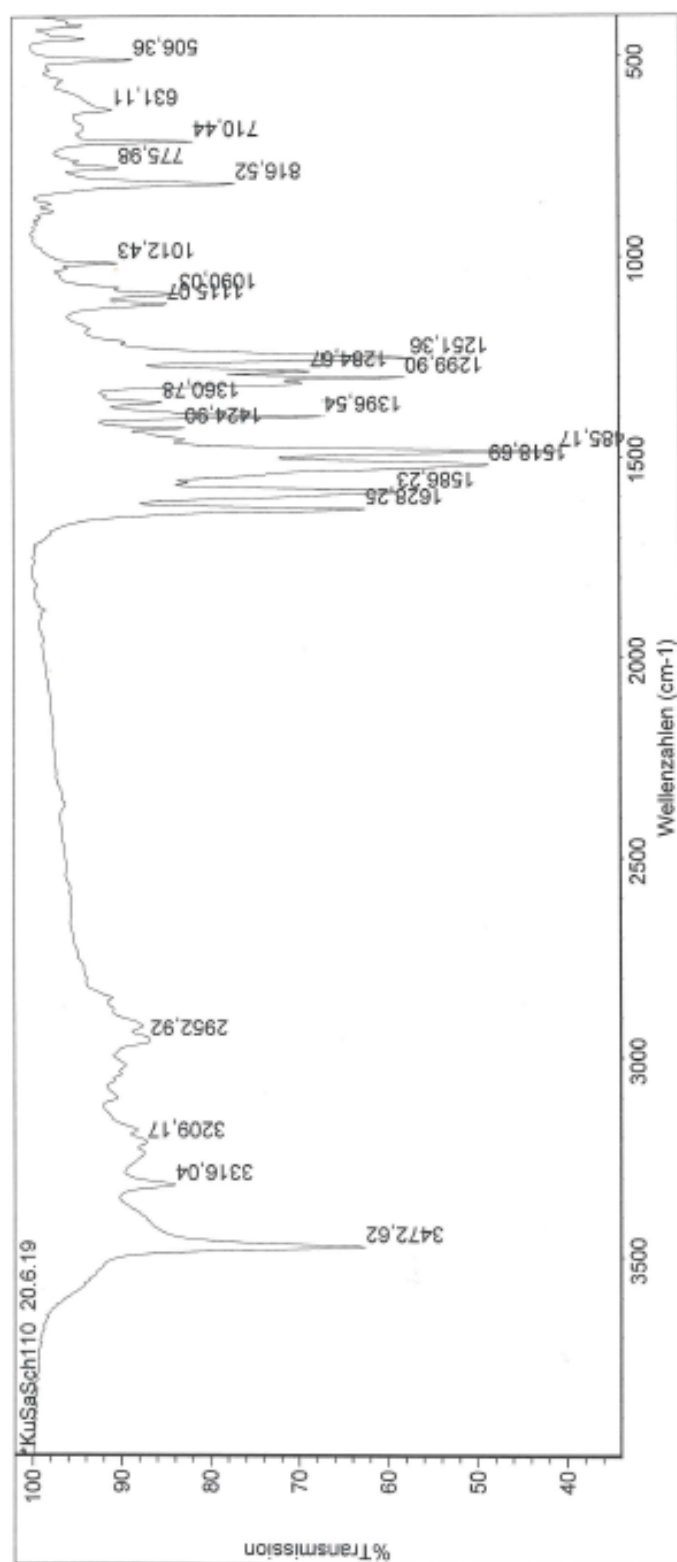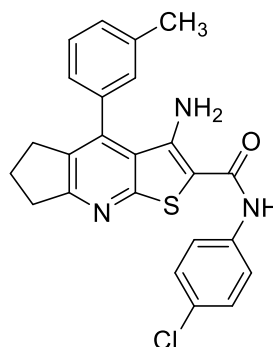

Thu Jun 20 11:21:46 2019 (GMT+02:00)

SUCHE BANDEN:

Spektrum: \*KuSaSch110 20.6.19

Bereich: 3999,64 400,00

Absoluter Schwellwert: 91,017

Sensitivität: 50

Bandentabelle:

|           |         |             |        |
|-----------|---------|-------------|--------|
| Position: | 1485,17 | Intensität: | 40,677 |
| Position: | 1518,69 | Intensität: | 48,530 |
| Position: | 1251,36 | Intensität: | 57,328 |
| Position: | 1299,90 | Intensität: | 57,912 |
| Position: | 1586,23 | Intensität: | 58,842 |
| Position: | 1628,25 | Intensität: | 62,427 |
| Position: | 3472,62 | Intensität: | 62,577 |

Figure S53: APCI-MS spectrum of **17f** (KuSaSch110).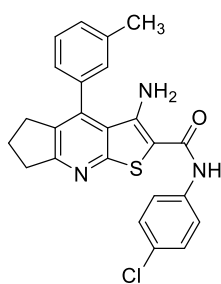

Exact Mass: 433,10156

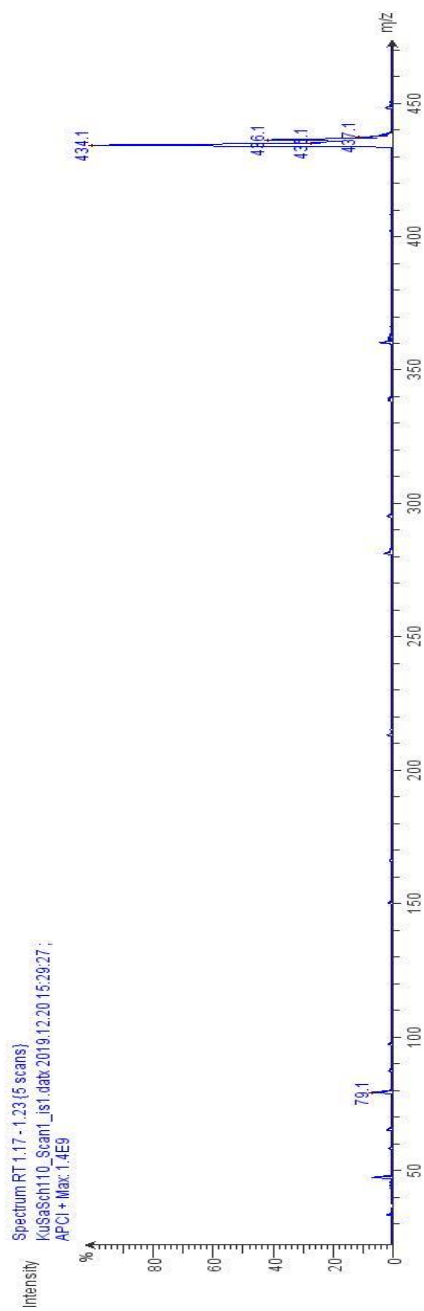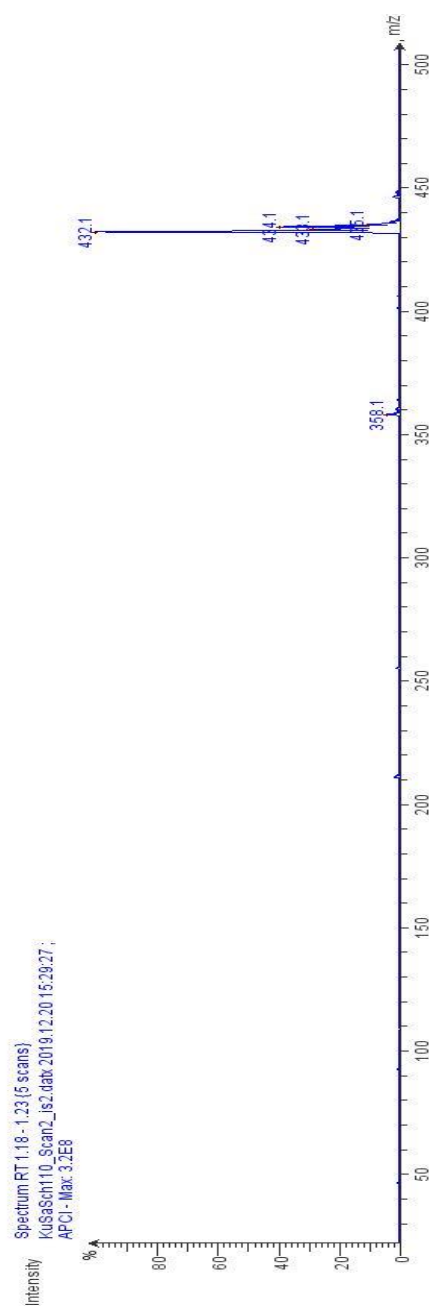

Figure S54:  $^1\text{H-NMR}$  spectrum of **17g** (KuSaSch111).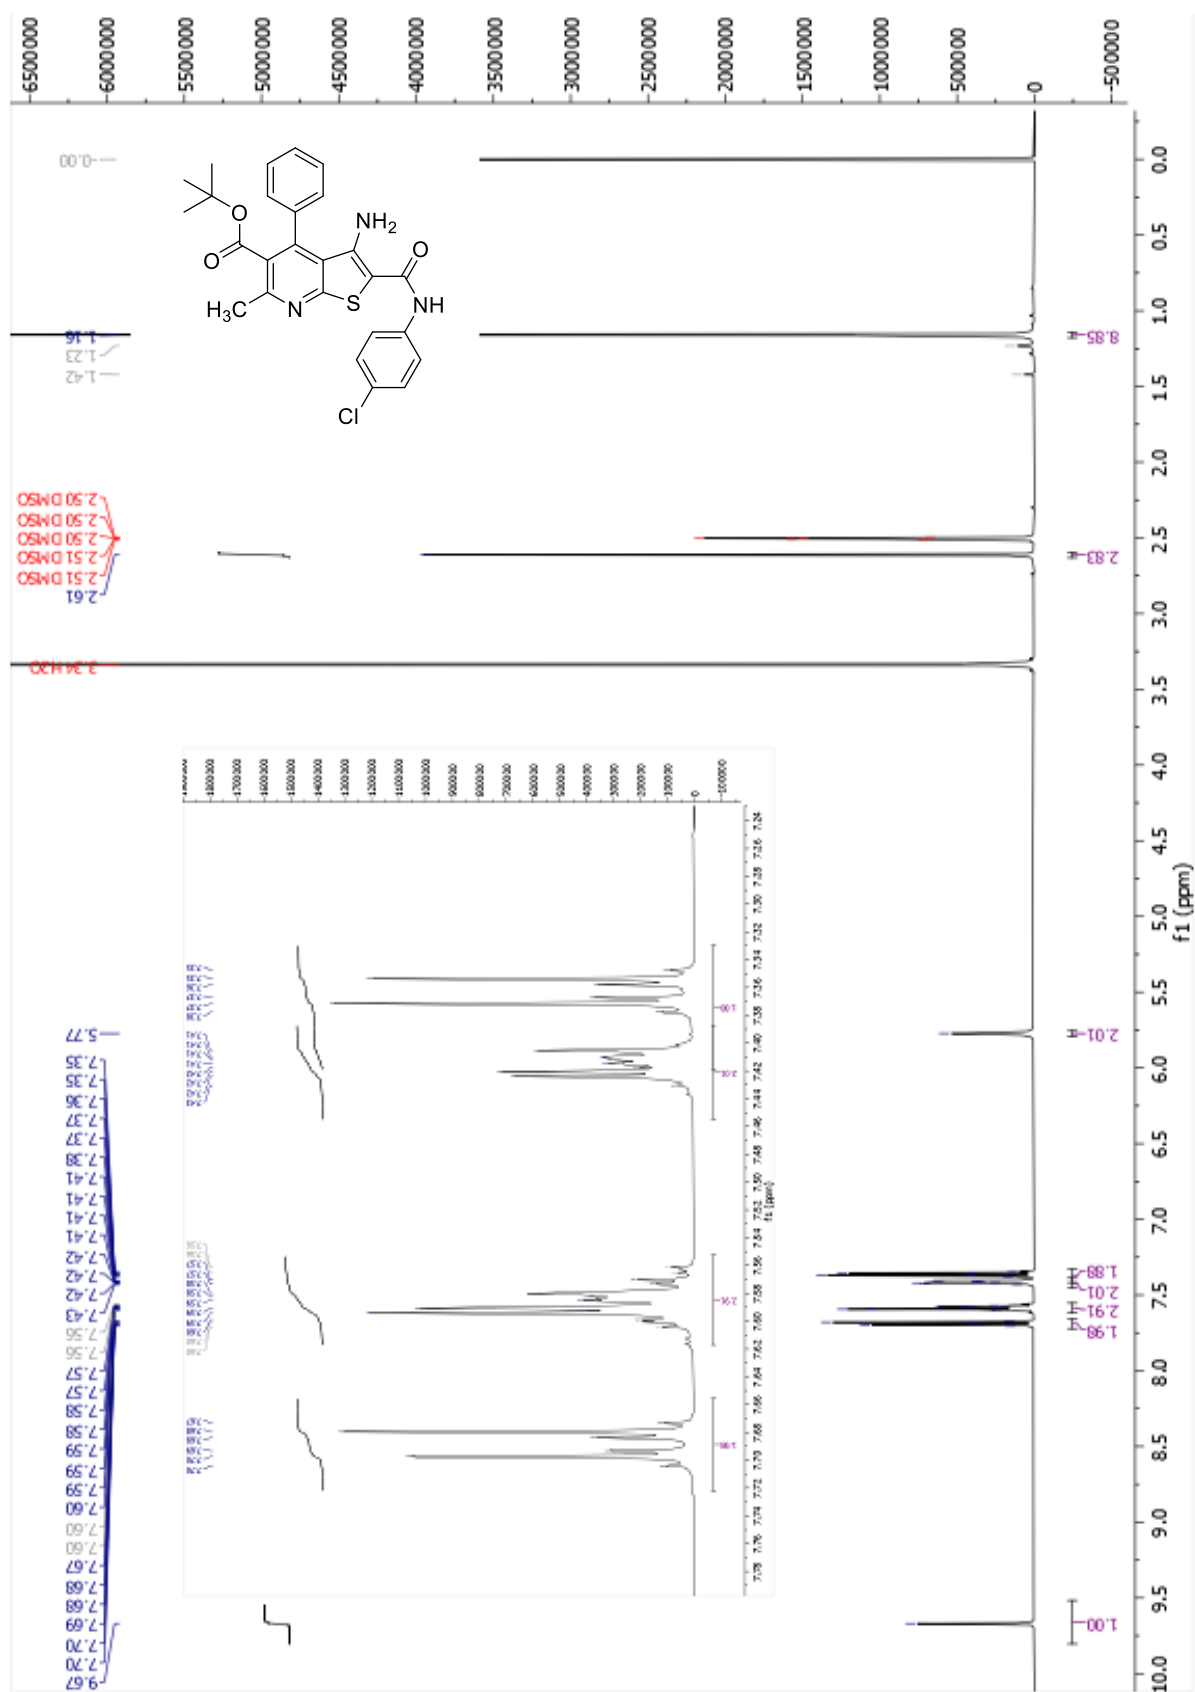

Figure S55:  $^{13}\text{C}$ -NMR spectrum of **17f** (KuSaSch111).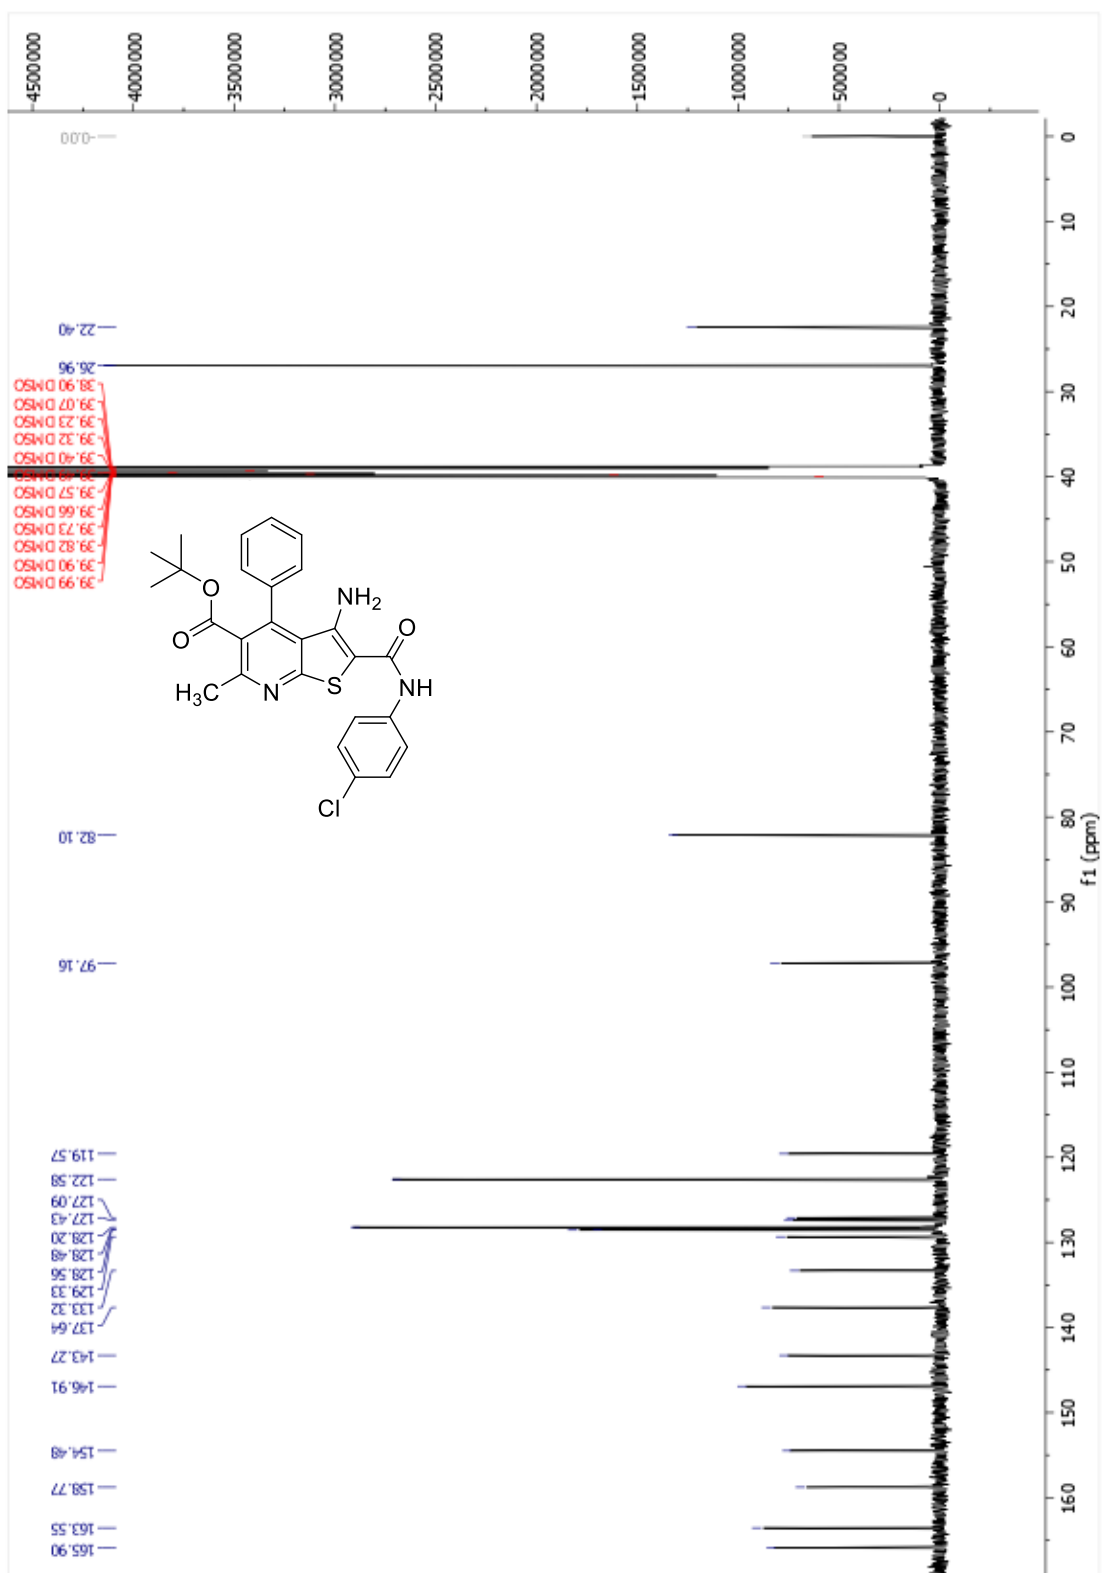

Figure S56: IR spectrum of **17f** (KuSaSch111).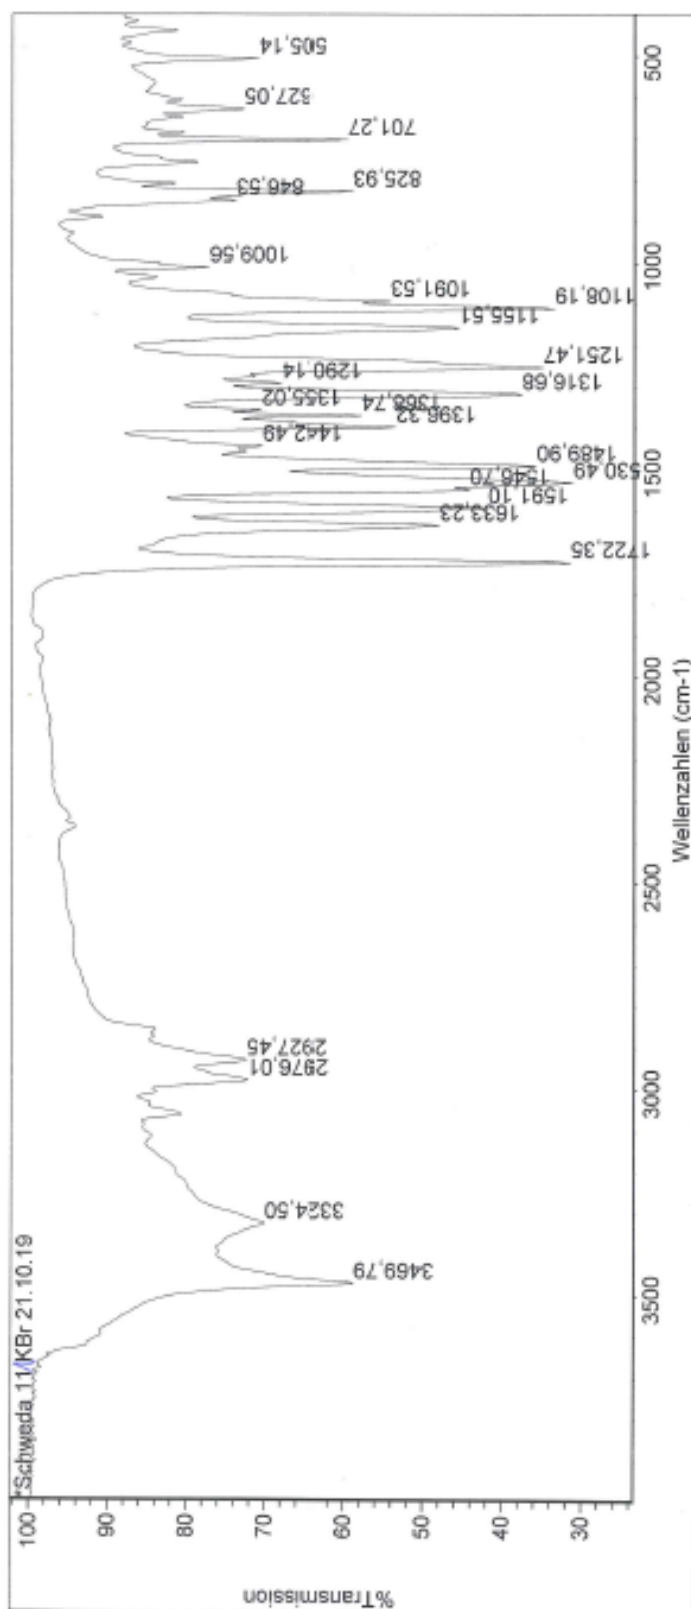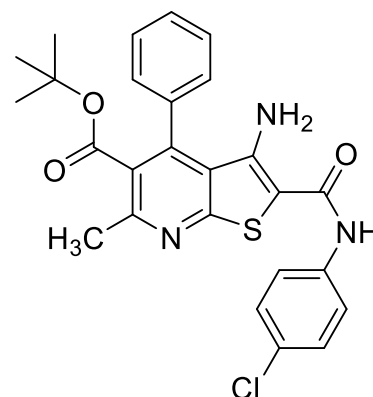

Mon Okt 21 10:47:18 2019 (GMT+02:00)

SUCHE BANDEN:

Spektrum: \*Schweda 11/KBr 21.10.19

Bereich: 3999,64 400,00

Absoluter Schwellwert: 78,073

Sensitivität: 60

Bandentabelle:

|           |         |             |        |
|-----------|---------|-------------|--------|
| Position: | 1530,49 | Intensität: | 31,150 |
| Position: | 1722,35 | Intensität: | 31,451 |
| Position: | 1108,19 | Intensität: | 33,485 |
| Position: | 1251,47 | Intensität: | 34,966 |
| Position: | 1489,90 | Intensität: | 35,764 |
| Position: | 1316,68 | Intensität: | 37,631 |
| Position: | 1591,10 | Intensität: | 41,909 |



Figure S57: APCI-MS spectrum of **17f** (KuSaSch111).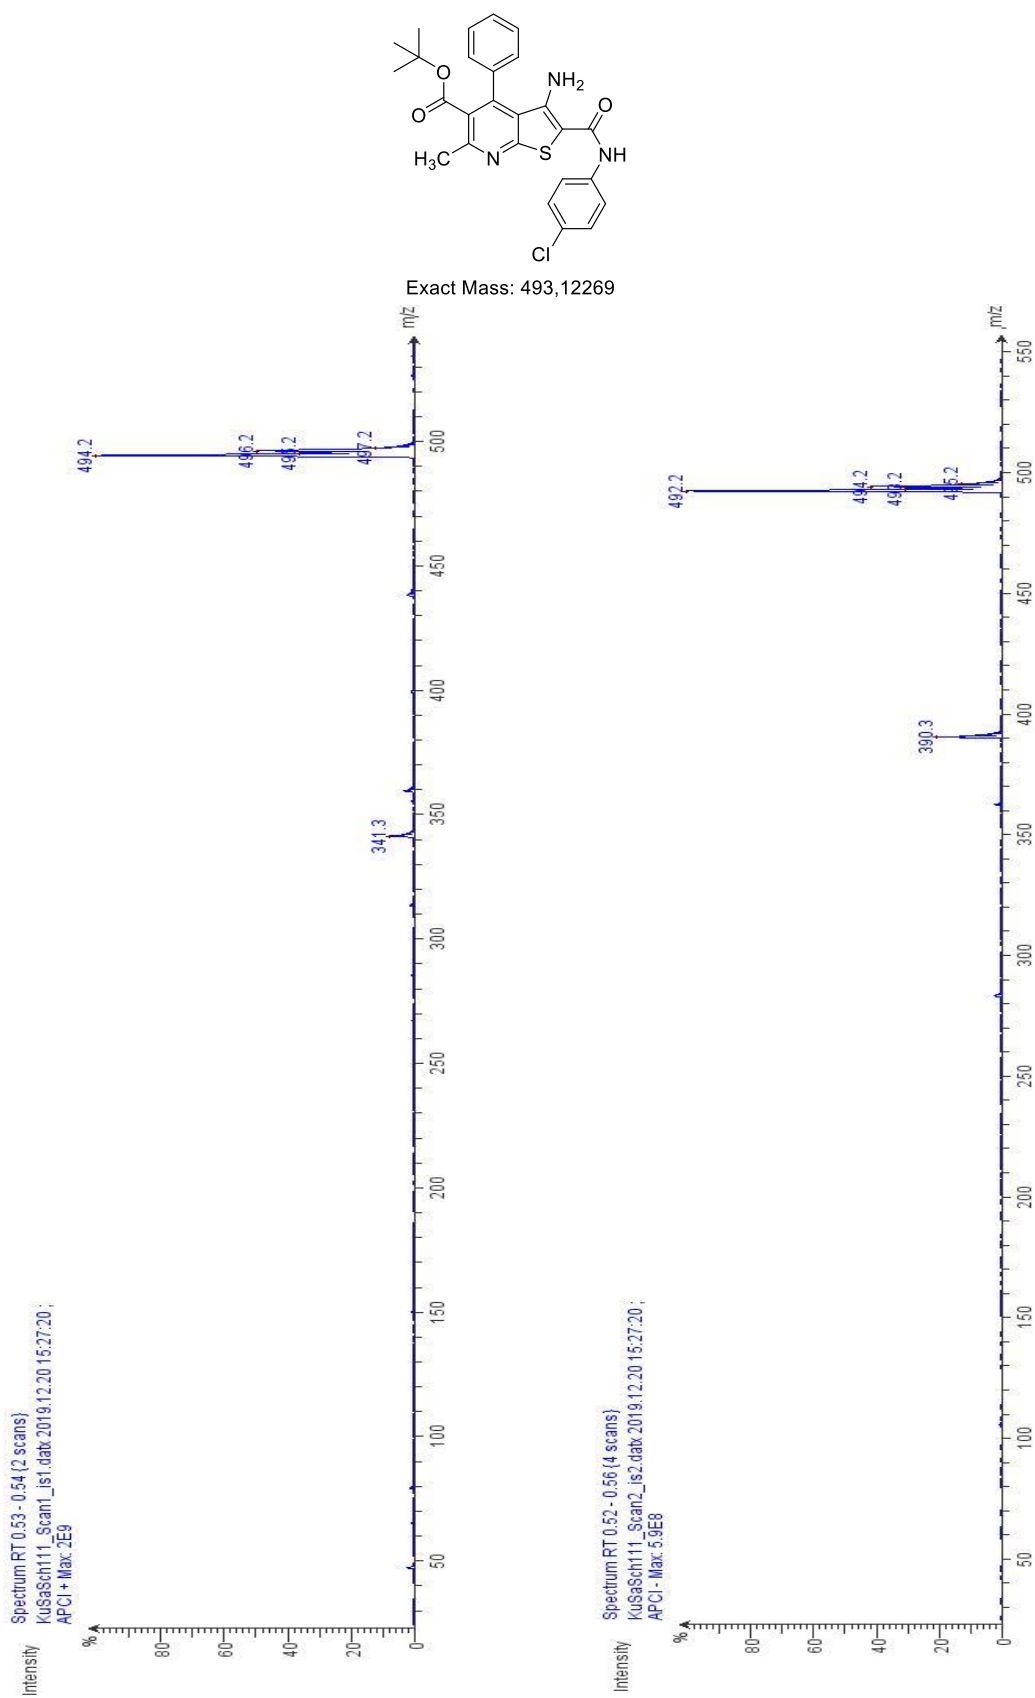

Figure S58:  $^1\text{H-NMR}$  spectrum of **17h** (KuSaSch112).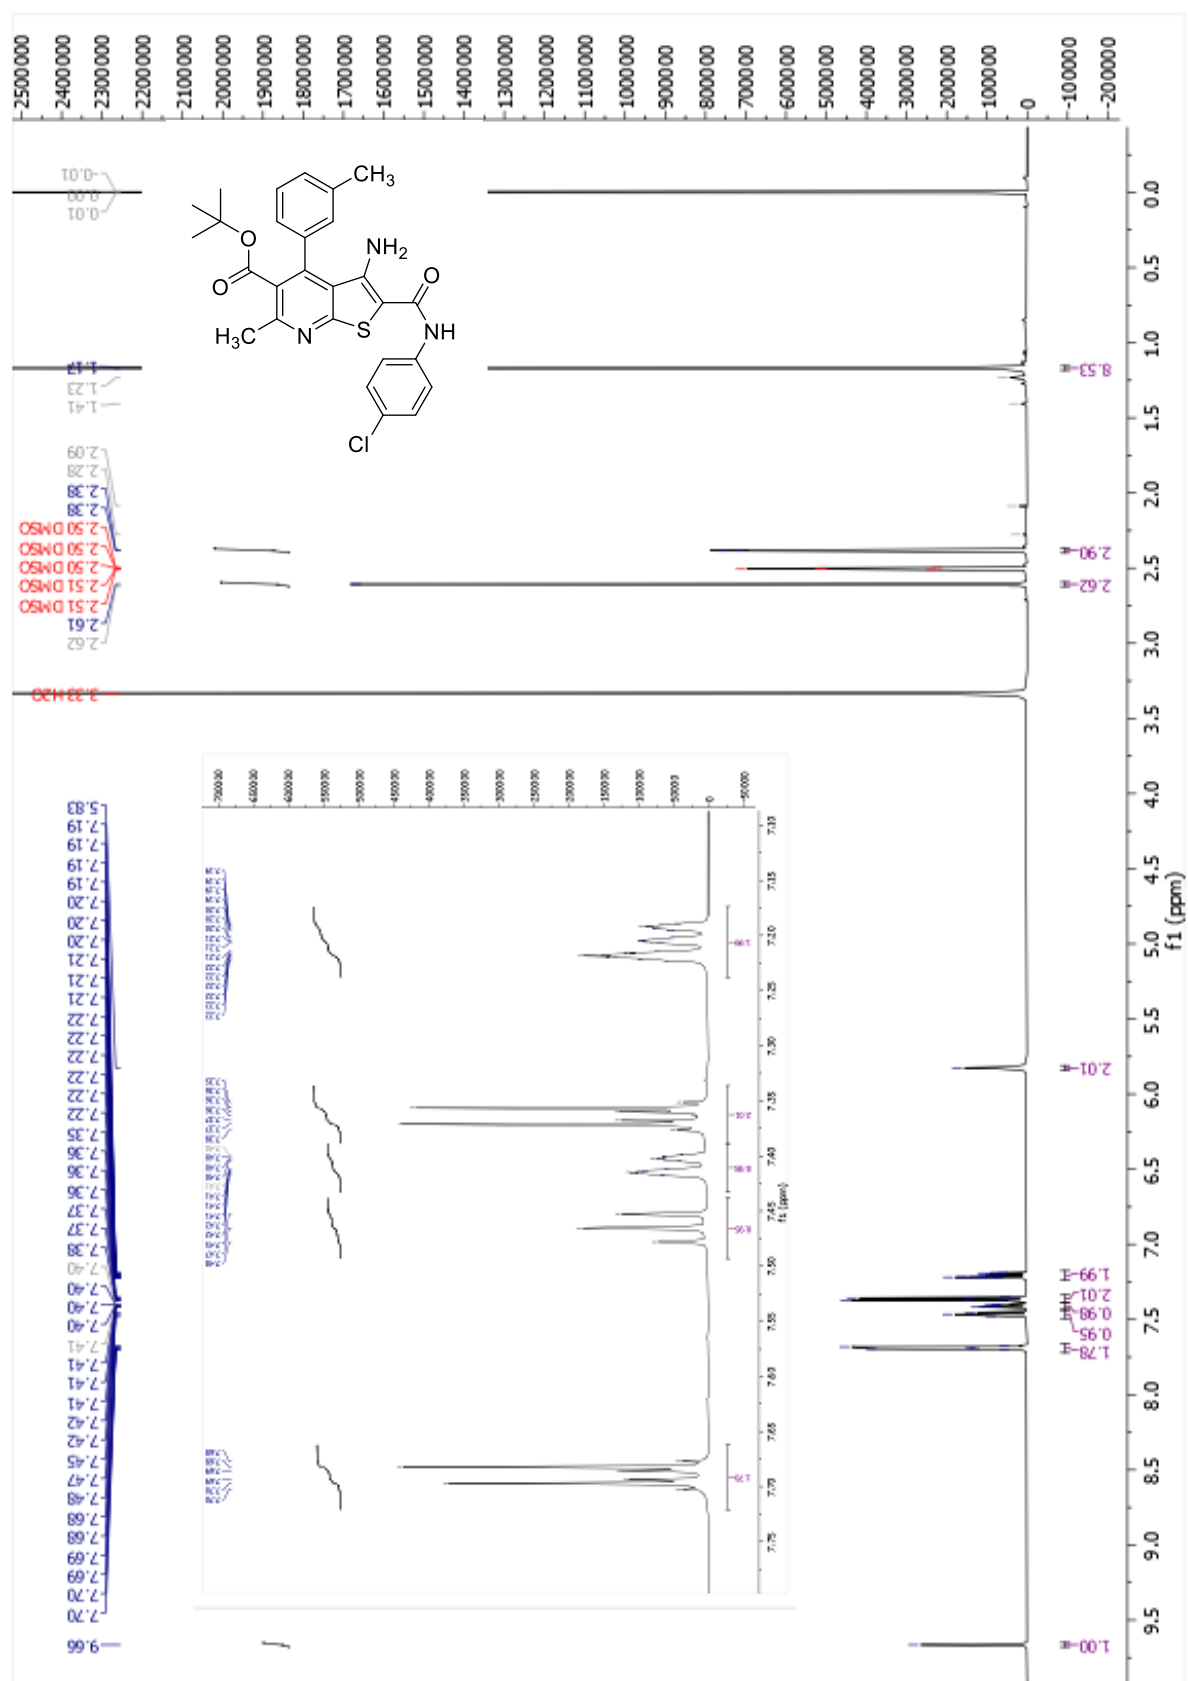

Figure S59:  $^{13}\text{C}$ -NMR spectrum of **17h** (KuSaSch112).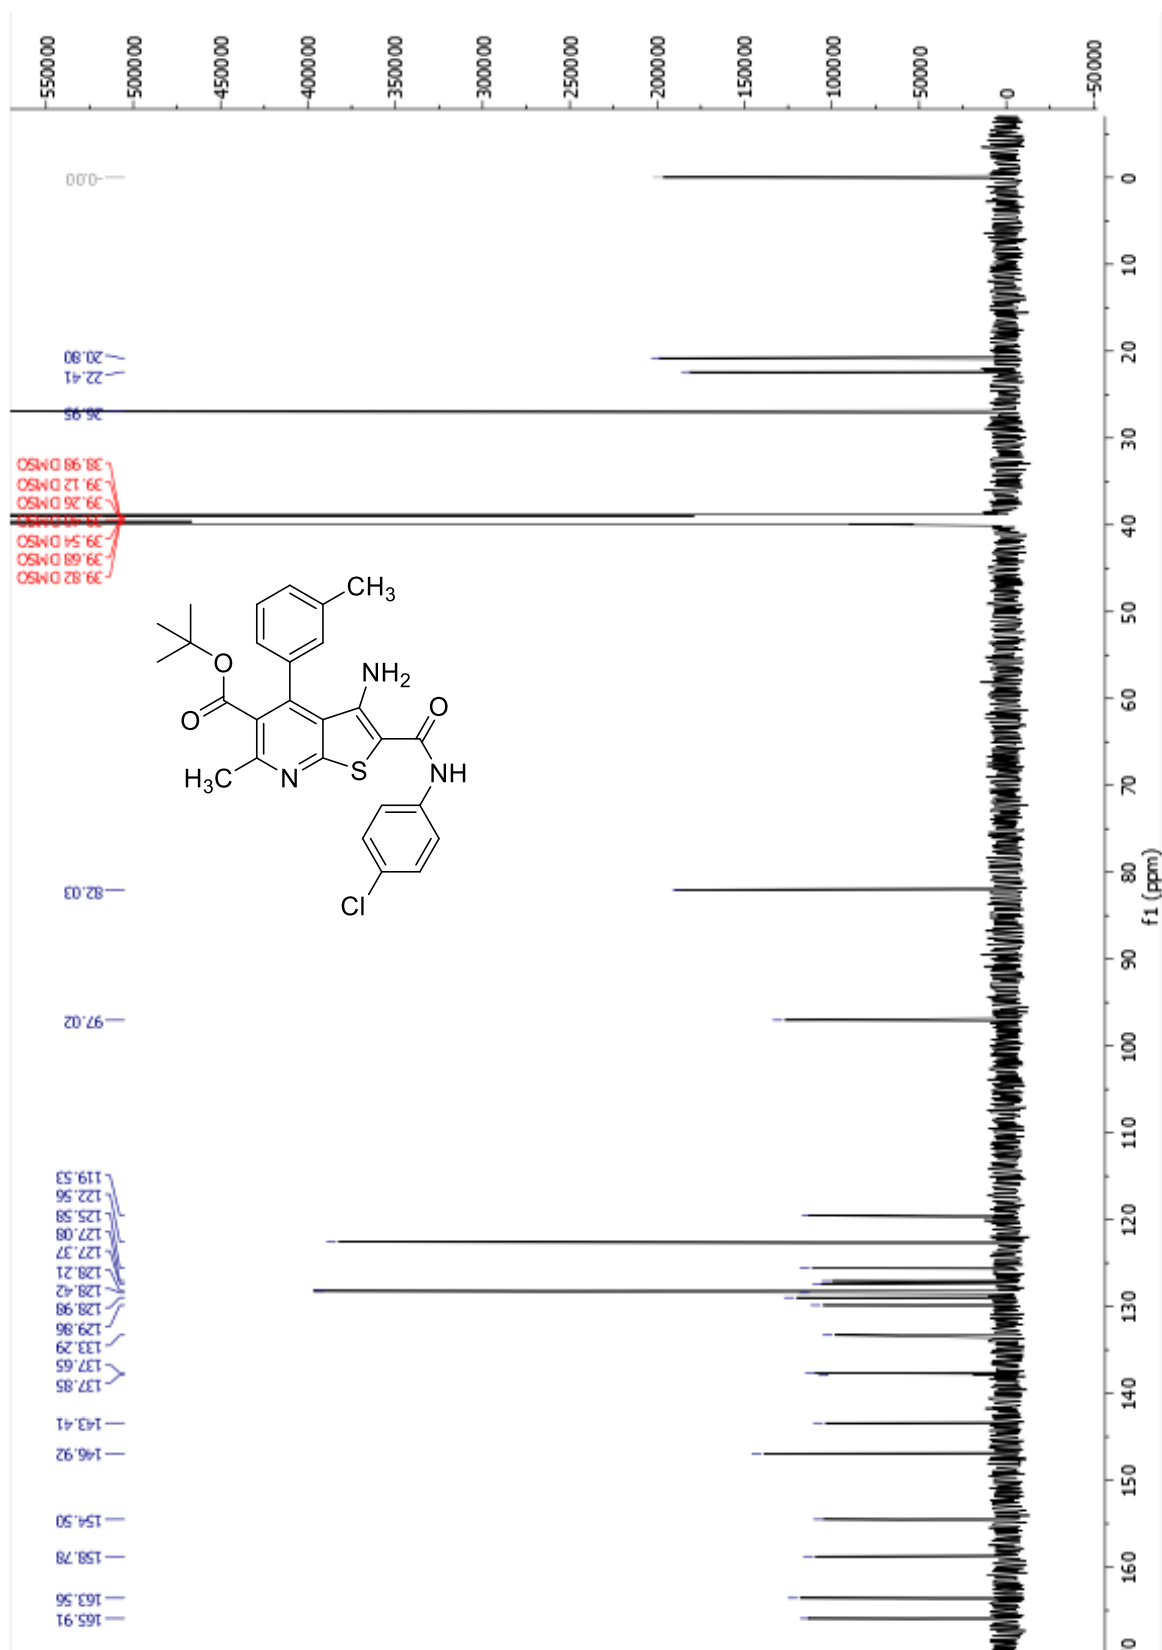

Figure S60: IR spectrum of **17h** (KuSaSch112).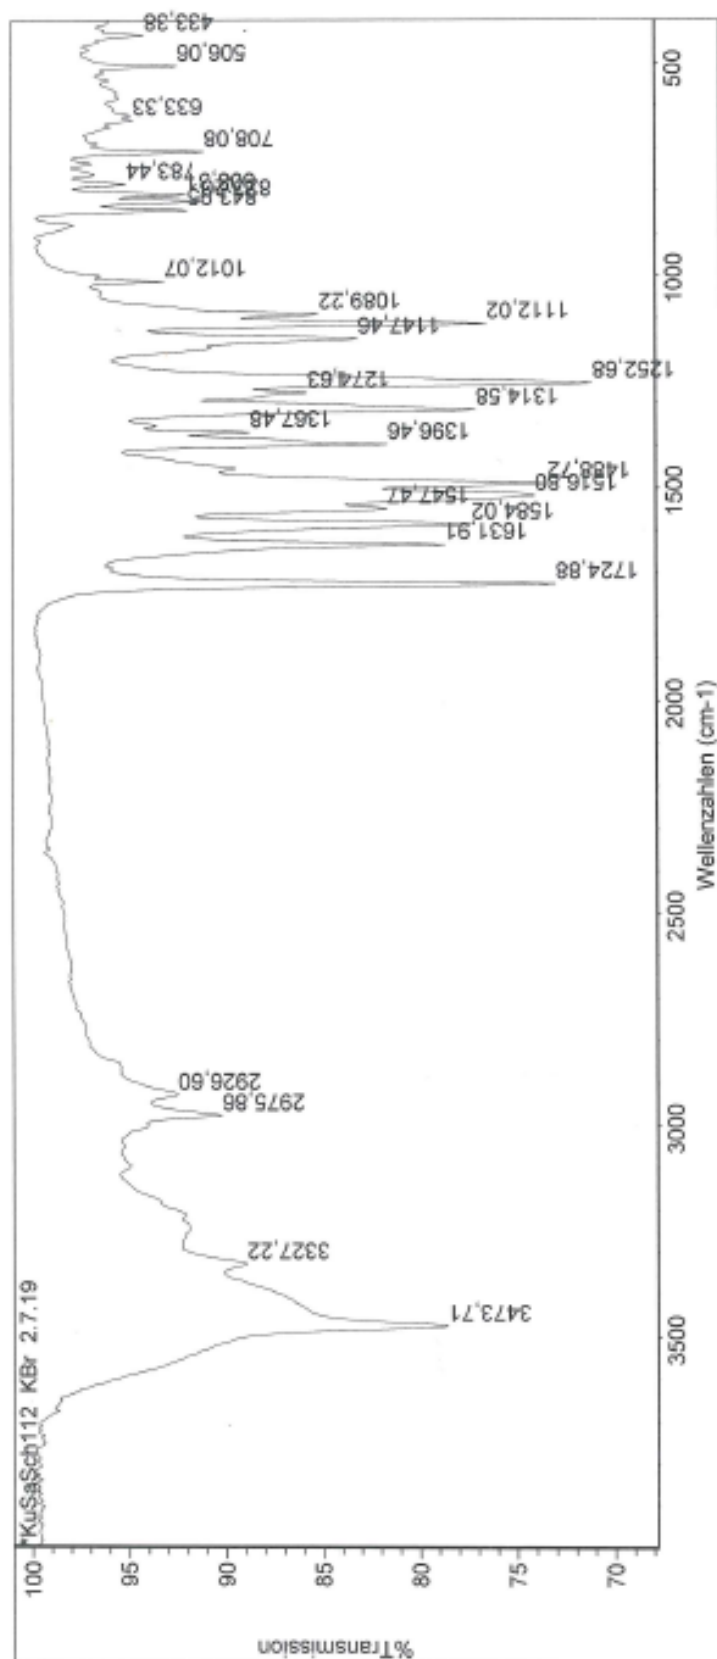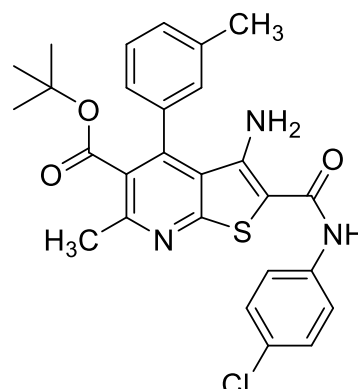

Tue Jul 02 11:08:55 2019 (GMT+02:00)

SUCHE BANDEN:

Spektrum: \*KuSaSch112 KBr 2.7.19

Bereich: 3999,64 400,00

Absoluter Schwellwert: 95,401

Sensitivität: 50

Bandentabelle:

|           |         |             |        |
|-----------|---------|-------------|--------|
| Position: | 1252,68 | Intensität: | 71,078 |
| Position: | 1724,88 | Intensität: | 72,978 |
| Position: | 1488,72 | Intensität: | 73,371 |
| Position: | 1516,80 | Intensität: | 74,028 |
| Position: | 1112,02 | Intensität: | 76,504 |
| Position: | 1314,58 | Intensität: | 77,063 |
| Position: | 1584,02 | Intensität: | 77,281 |

Figure S61: APCI-MS spectrum of **17h** (KuSaSch112).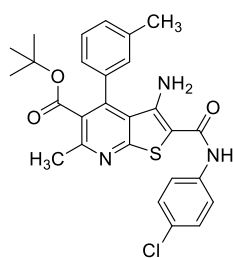

Exact Mass: 507,13834

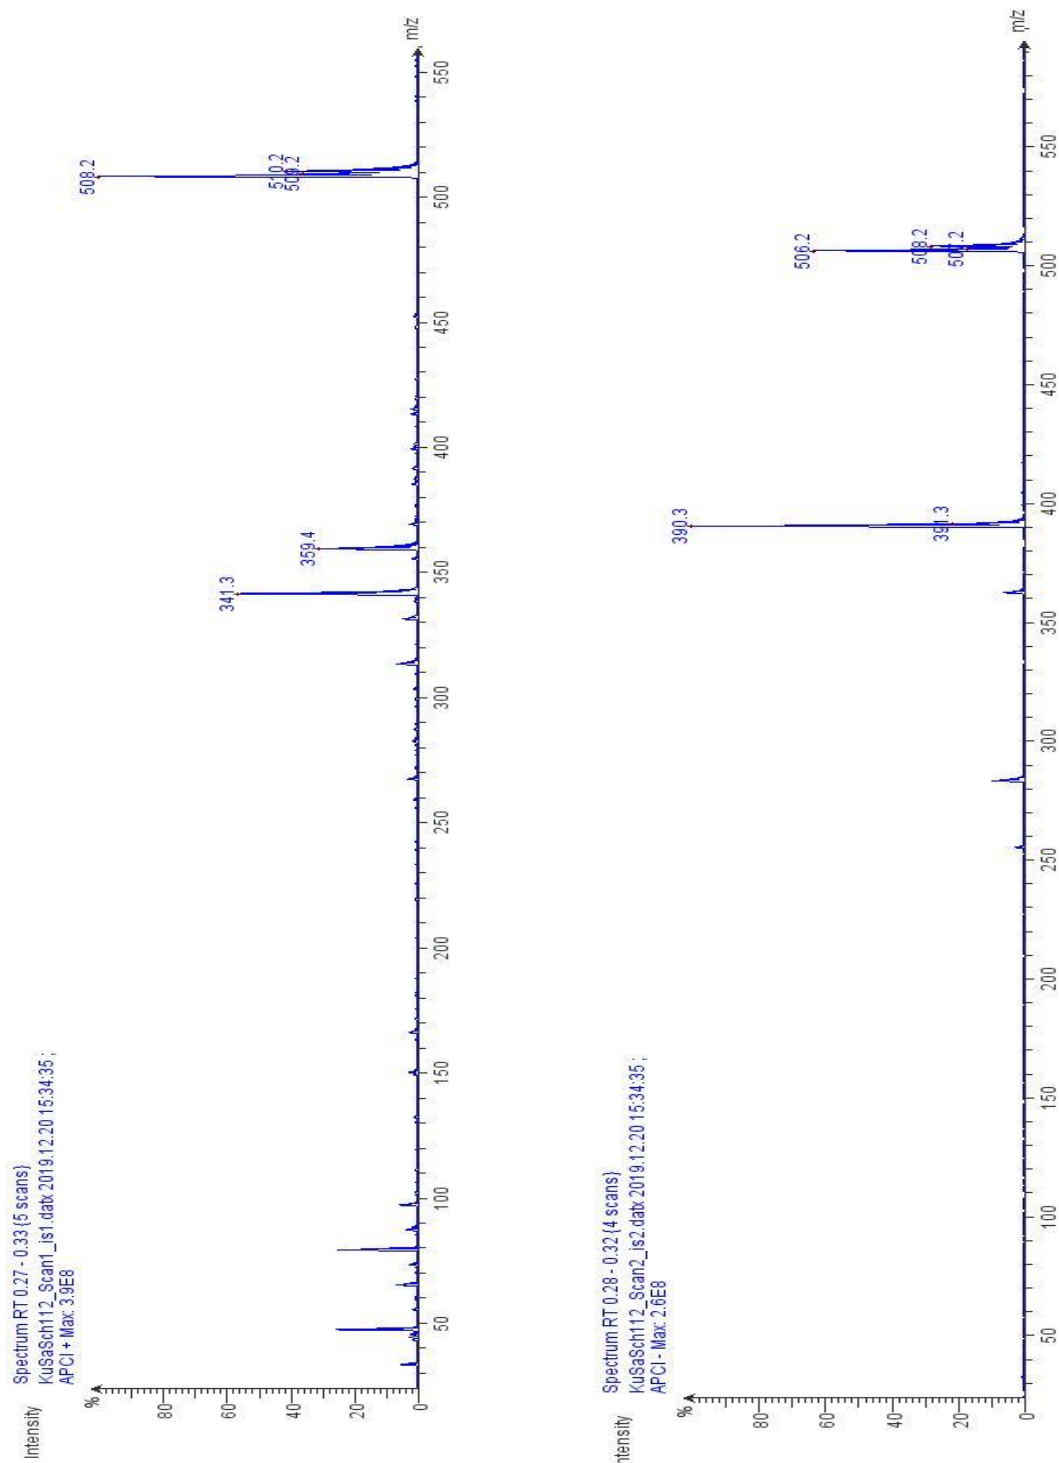

Figure S62: HPLC chromatogram of **9a** (KuSaSch018) – gradient method (HPLC 3)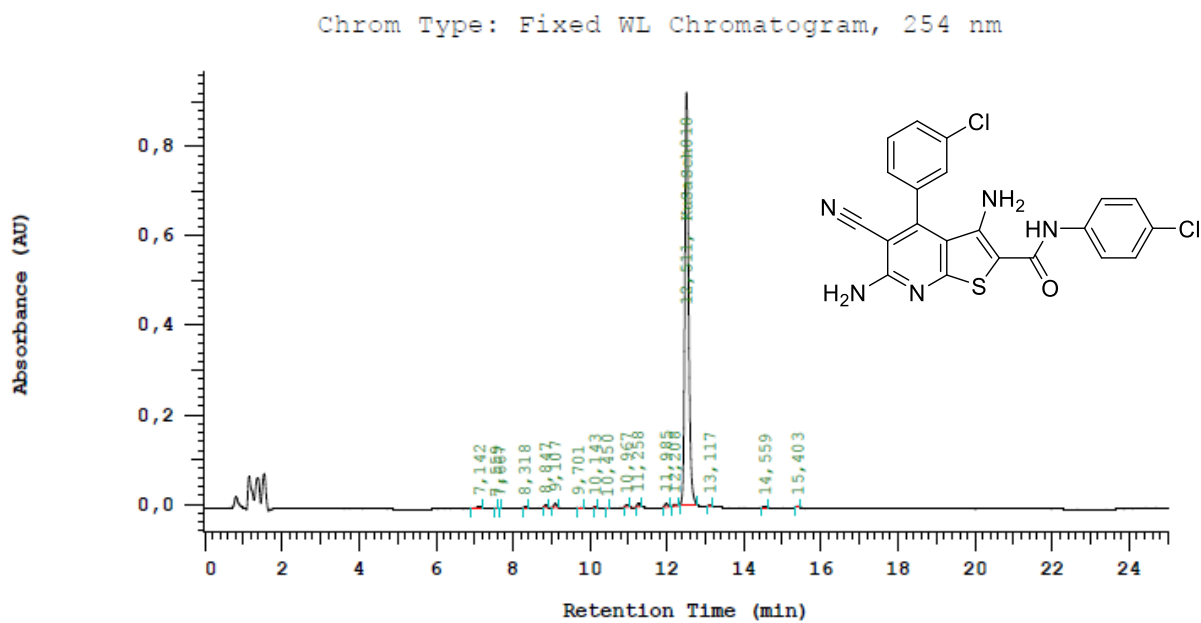Figure S63: HPLC chromatogram of **9a** (KuSaSch018) – isocratic method (HPLC 1)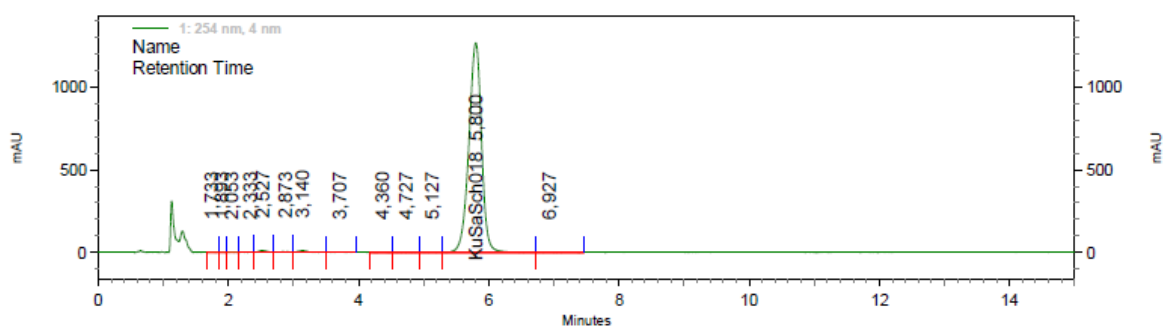

Figure S64: HPLC chromatogram of **9e** (KuSaSch031) – gradient method (HPLC 3)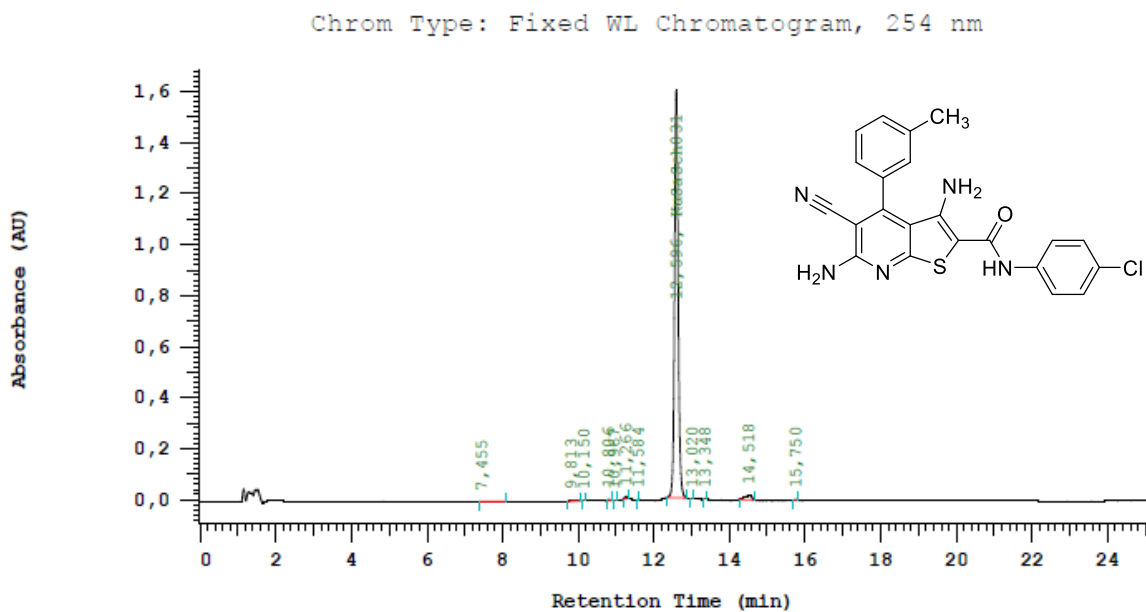Figure S65: HPLC chromatogram of **9e** (KuSaSch031) – isocratic method (HPLC 1)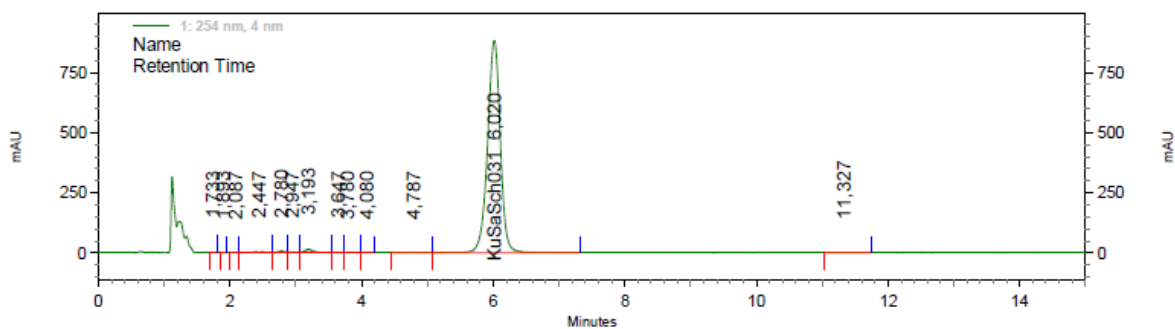

Figure S66: HPLC chromatogram of **9m** (KuSaSch134) – gradient method (HPLC 3)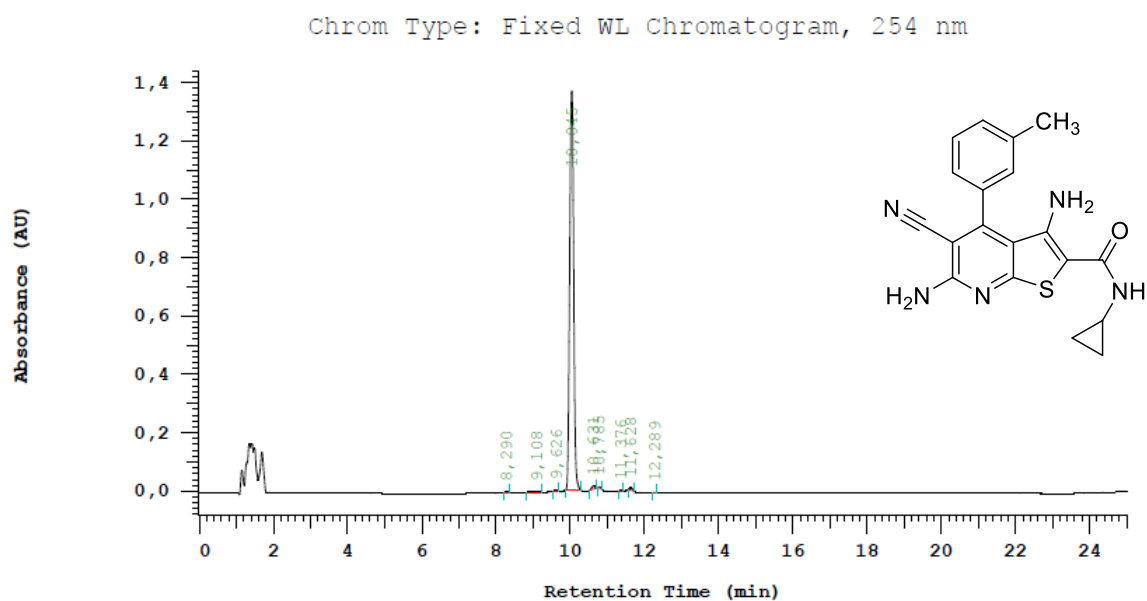Figure S67: HPLC chromatogram of **9m** (KuSaSch134) – isocratic method (HPLC 1)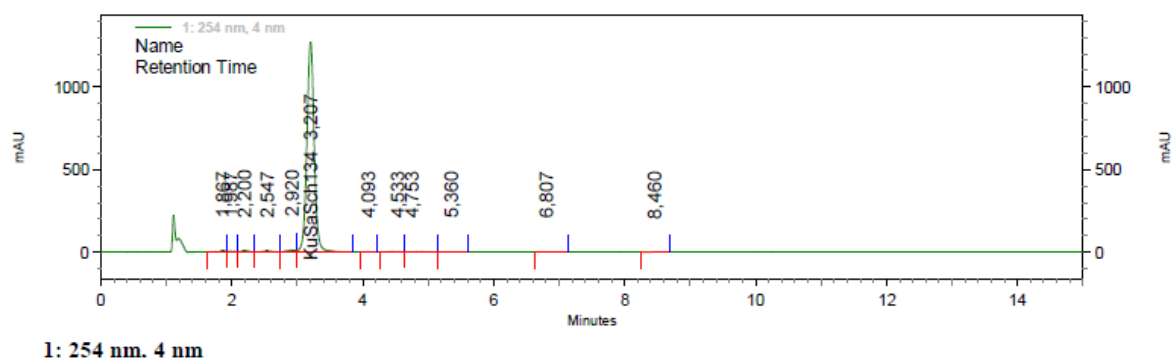



Figure S68: HPLC chromatogram of **9y** (KuSaSch060) – gradient method (HPLC 3)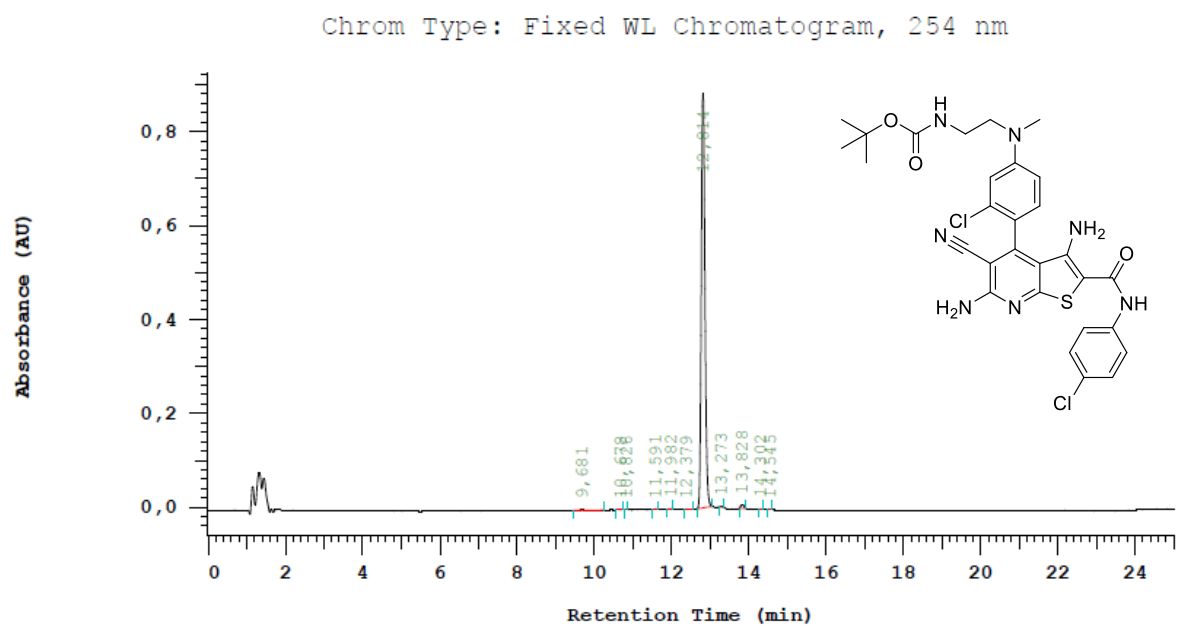Figure S69: HPLC chromatogram of **9y** (KuSaSch060) – isocratic method (HPLC 1)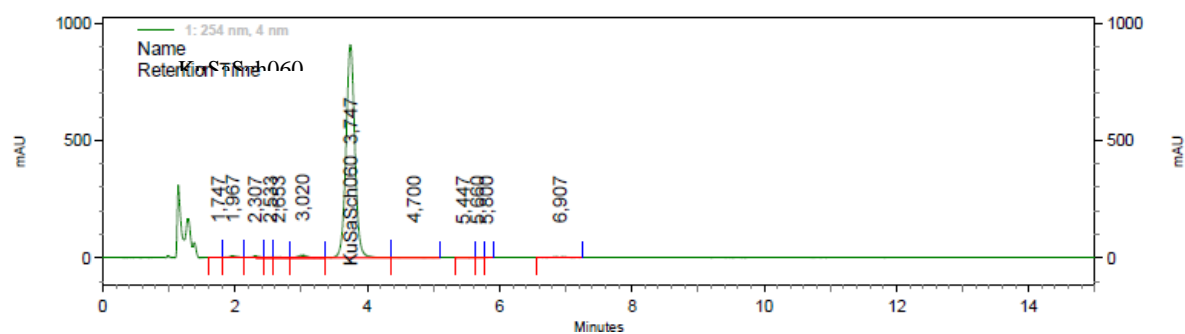

Figure S70: HPLC chromatogram of **9ac** (KuSaSch073) – gradient method (HPLC 3)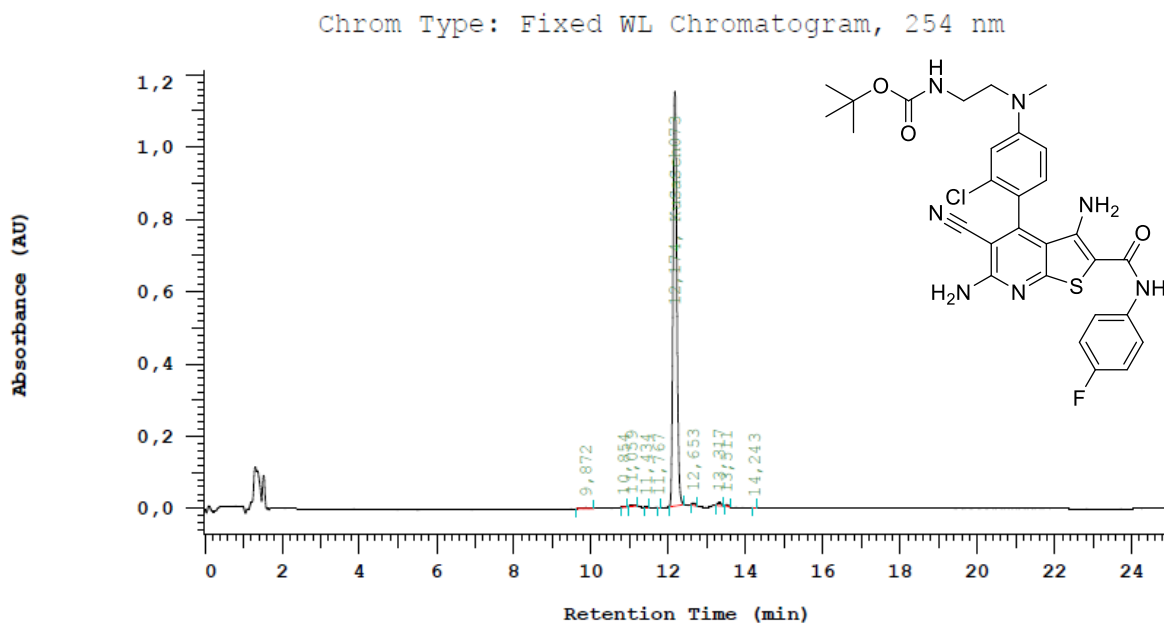Figure S71: HPLC chromatogram of **9ac** (KuSaSch073) – isocratic method (HPLC 1)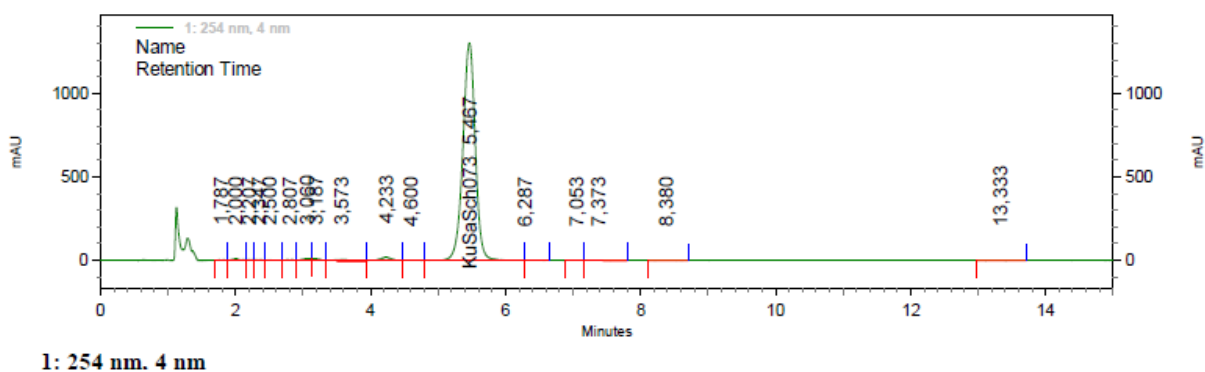

Figure S72: HPLC chromatogram of **17a** (KuSaSch095) – gradient method (HPLC 3)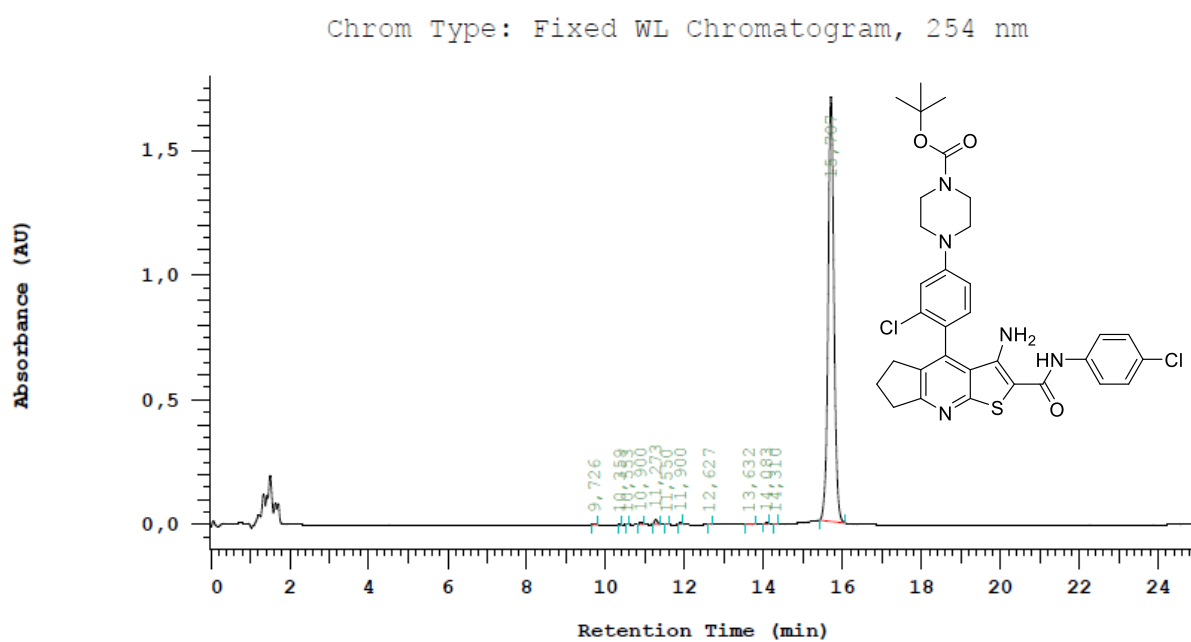Figure S73: HPLC chromatogram of **17a** (KuSaSch095) – isocratic method (HPLC 1)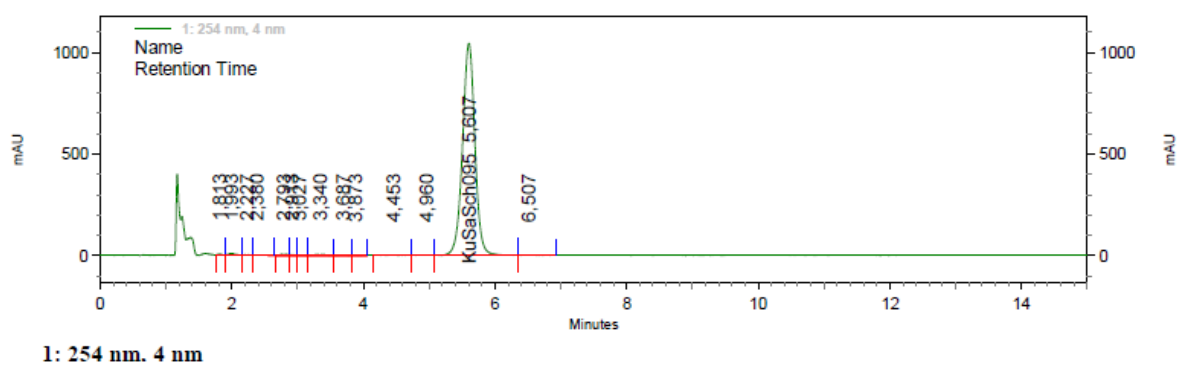

Figure S74: HPLC chromatogram of **17b** (KuSaSch100) – gradient method (HPLC 3)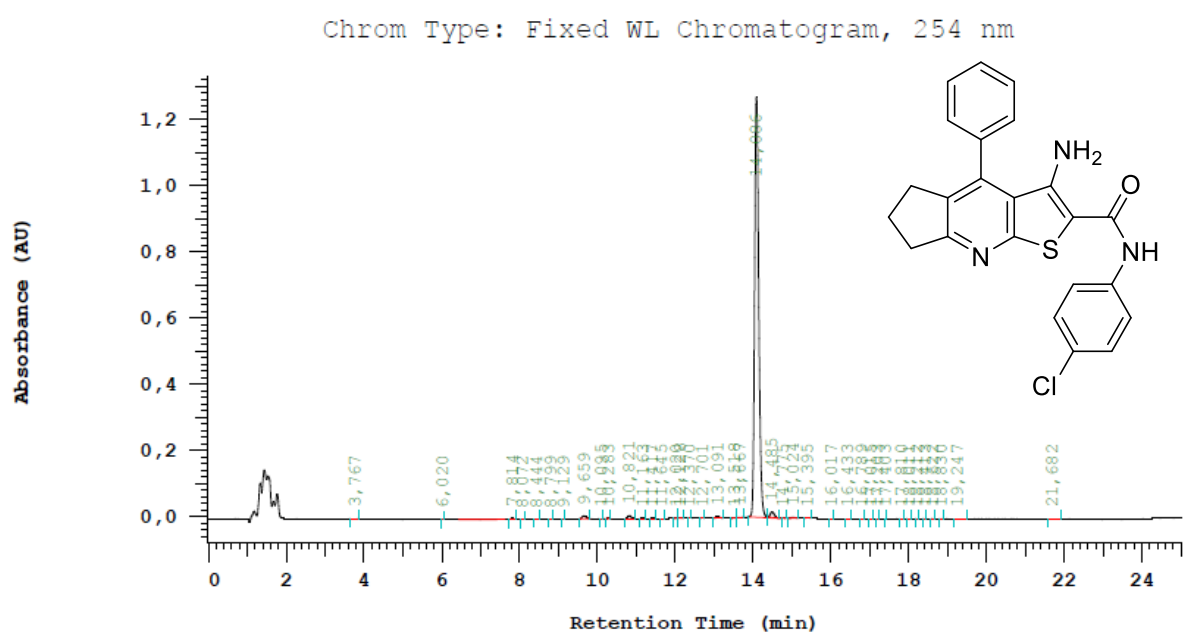Figure S75: HPLC chromatogram of **17b** (KuSaSch100) – isocratic method (HPLC 1)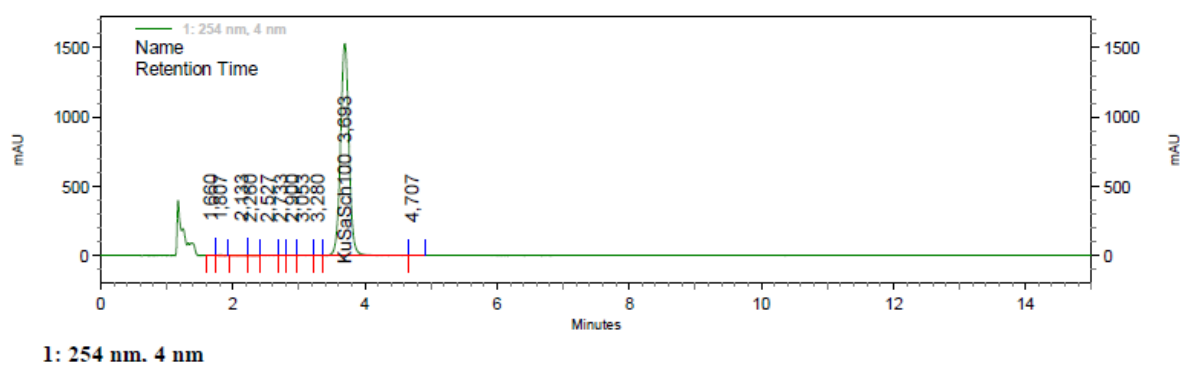

Figure S76: HPLC chromatogram of **17f** (KuSaSch110) – gradient method (HPLC 3)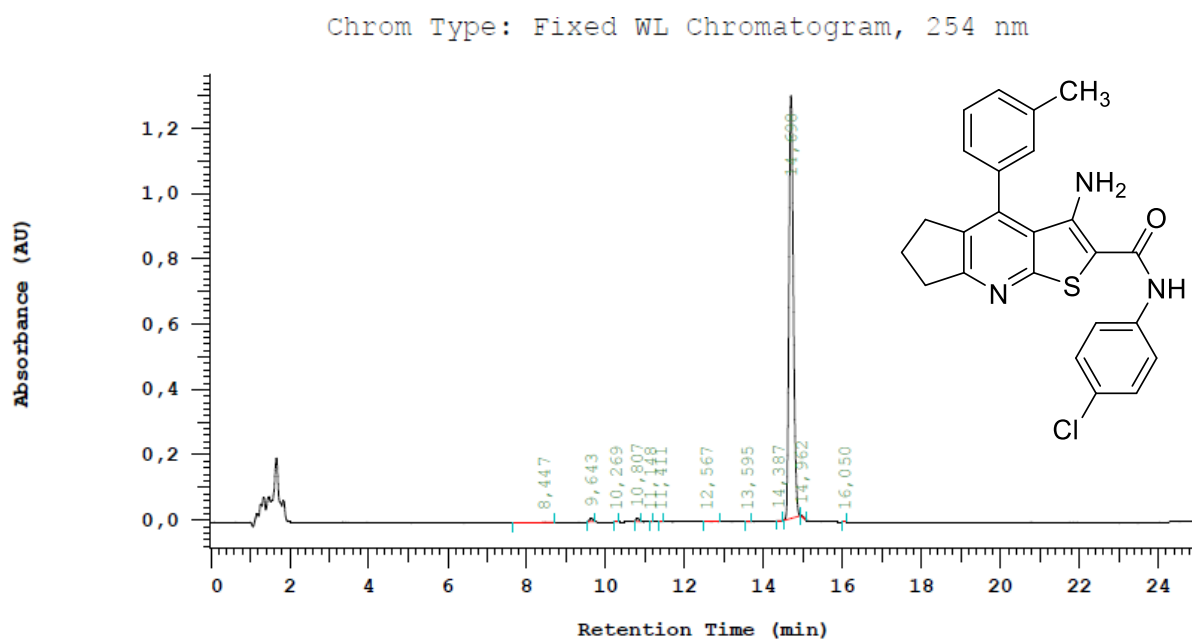Figure S77: HPLC chromatogram of **17f** (KuSaSch110) – isocratic method (HPLC 1)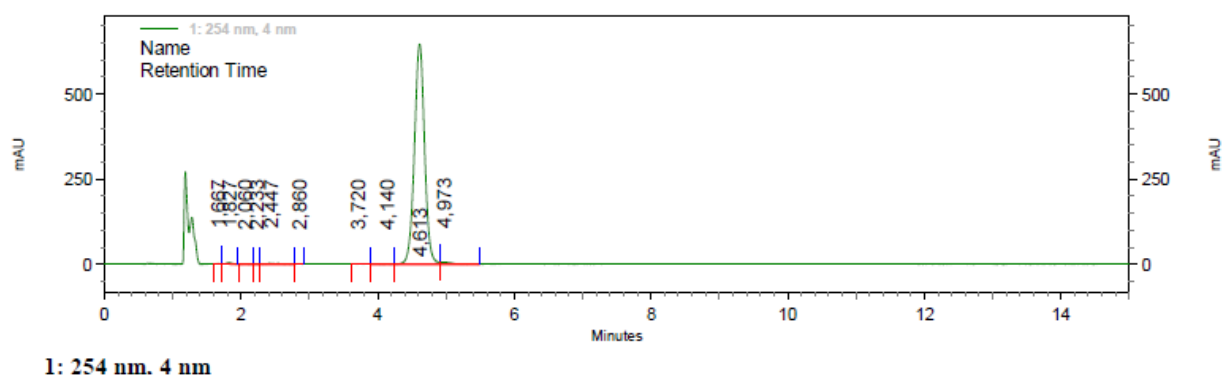

1: 254 nm, 4 nm

Figure S78: HPLC chromatogram of **17g** (KuSaSch111) – gradient method (HPLC 3)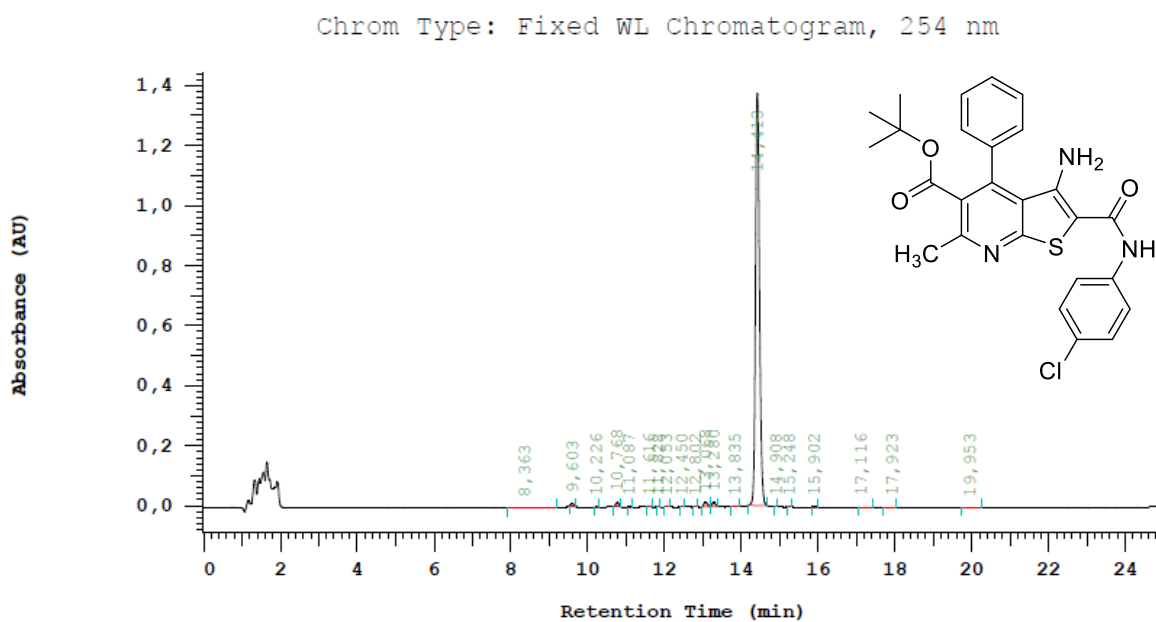Figure S79: HPLC chromatogram of **17g** (KuSaSch111) – isocratic method (HPLC 1)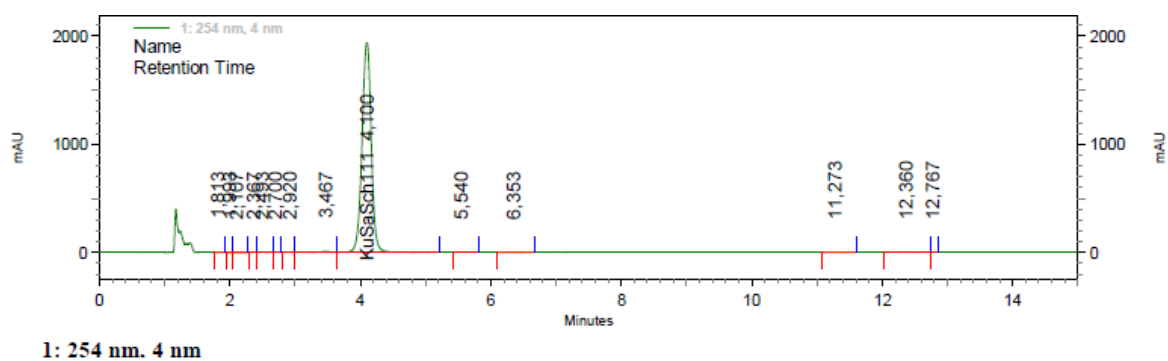

**Sample Availability:** Samples of the compounds are not available from the authors.

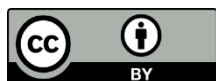

© 2020 by the authors. Submitted for possible open access publication under the terms and conditions of the Creative Commons Attribution (CC BY) license (<http://creativecommons.org/licenses/by/4.0/>).
